# Supplementary material for: A novel molecular classification of diffuse large B cell lymphoma based on Metabolism-related genes
Source: Research Square preprint supplement (doi:10.21203/rs.3.rs-132445/v1), 2020-12-23
Supplement: Supplementary file 1 [file b95cabbc500fa205bf459b98.xlsx]

## Sheet: Table S1
Supplementary Table-S1:The 948 metabolism associated genes
Gene Symbol
AACS
AADAT
AANAT
ABAT
AC005759.1
AC020613.1
AC139530.1
ACAA1
ACAA2
ACACA
ACACB
ACADL
ACADM
ACADS
ACADSB
ACADVL
ACAT1
ACAT2
ACER1
ACER2
ACER3
ACHE
ACMSD
ACO1
ACO2
ACOT12
ACOX1
ACOX3
ACP1
ACP2
ACP4
ACP5
ACP6
ACPP
ACSL1
ACSL3
ACSL4
ACSL5
ACSL6
ACSM1
ACSM2A
ACSM3
ACSM4
ACSM5
ACSS1
ACSS2
ACSS3
ACY1
ACY3
ACYP1
ACYP2
ADA
ADCY1
ADCY10
ADCY2
ADCY3
ADCY4
ADCY5
ADCY6
ADCY7
ADCY8
ADCY9
ADH1A
ADH1B
ADH1C
ADH4
ADH5
ADH6
ADH7
ADI1
ADK
ADO
ADPRM
ADSL
ADSS
ADSSL1
AFMID
AGK
AGL
AGMAT
AGPAT1
AGPAT2
AGPAT3
AGPAT4
AGPS
AGXT
AGXT2
AHCY
AHCYL1
AHCYL2
AK1
AK2
AK3
AK4
AK5
AK7
AKR1A1
AKR1B1
AKR1B10
AKR1C1
AKR1C2
AKR1C3
AKR1C4
ALAD
ALAS1
ALAS2
ALDH18A1
ALDH1A1
ALDH1A2
ALDH1A3
ALDH1B1
ALDH2
ALDH3A1
ALDH3A2
ALDH3B1
ALDH3B2
ALDH4A1
ALDH5A1
ALDH6A1
ALDH7A1
ALDH9A1
ALDOA
ALDOB
ALDOC
ALLC
ALOX12
ALOX12B
ALOX15
ALOX15B
ALOX5
AMD1
AMDHD1
AMDHD2
AMPD1
AMPD2
AMPD3
AMT
AMY1A
AMY1B
AMY1C
AMY2A
AMY2B
ANPEP
AOC1
AOC2
AOC3
AOX1
APIP
APRT
ARG1
ARG2
ARSA
ASAH1
ASAH2
ASL
ASMT
ASNS
ASPA
ASS1
ATIC
AWAT2
AZIN2
B4GALT1
B4GALT2
B4GALT6
BAAT
BCO1
BDH1
BDH2
BHMT
BLVRA
BLVRB
BPNT1
BST1
BUD23
CA1
CA12
CA13
CA14
CA2
CA3
CA4
CA5A
CA5B
CA6
CA7
CA8
CA9
CAD
CANT1
CAT
CBR1
CBR3
CBS
CD38
CDA
CDIPT
CDO1
CDS1
CDS2
CEL
CERK
CES1
CES2
CES5A
CHAT
CHDH
CHIA
CHIT1
CHKA
CHKB
CHPT1
CHST11
CHST12
CHST13
CKB
CKM
CKMT1A
CKMT1B
CKMT2
CMAS
CMPK1
CMPK2
CNDP1
COMT
COX10
COX15
CP
CPOX
CPS1
CPT1A
CPT1B
CPT1C
CPT2
CRLS1
CS
CSAD
CTH
CTPS1
CTPS2
CYB5R1
CYB5R3
CYP1A1
CYP1A2
CYP1B1
CYP26A1
CYP26B1
CYP26C1
CYP2A13
CYP2A6
CYP2A7
CYP2B6
CYP2C18
CYP2C19
CYP2C8
CYP2C9
CYP2D6
CYP2E1
CYP2F1
CYP2J2
CYP2S1
CYP2U1
CYP3A4
CYP3A43
CYP3A5
CYP3A7
CYP4A11
CYP4A22
CYP4F2
CYP4F3
DAO
DBH
DCK
DCT
DCTD
DDC
DDO
DEGS1
DEGS2
DGAT1
DGAT2
DGKA
DGKB
DGKD
DGKE
DGKG
DGKH
DGKI
DGKQ
DGKZ
DGUOK
DHDH
DHODH
DHRS3
DHRS4
DHRS4L2
DHRS9
DLAT
DLD
DMGDH
DNMT1
DNMT3A
DNMT3B
DNMT3L
DPYD
DPYS
DTYMK
DUT
EARS2
ECHS1
ECI1
ECI2
EHHADH
ENOPH1
ENPP1
ENPP2
ENPP3
ENPP6
ENPP7
ENTPD1
ENTPD2
ENTPD3
ENTPD4
ENTPD5
ENTPD6
ENTPD8
EPHX1
EPHX2
EPRS
ETNK1
ETNK2
FADS2
FAH
FBP1
FBP2
FCSK
FECH
FHIT
FLAD1
FMO1
FMO2
FMO3
FMO4
FMO5
FPGT
FTCD
FTH1
FTMT
G6PC
G6PC2
G6PD
GAA
GAD1
GAD2
GAL3ST1
GALC
GALE
GALK1
GALK2
GALT
GAMT
GANC
GART
GATM
GBA
GBA3
GBE1
GCAT
GCDH
GCK
GCLC
GCLM
GDA
GFPT1
GFPT2
GGCT
GGT1
GGT5
GGT6
GGT7
GK
GK2
GLA
GLB1
GLDC
GLO1
GLS
GLS2
GLUD1
GLUD2
GLUL
GLYCTK
GMDS
GMPPA
GMPPB
GMPR
GMPR2
GMPS
GNE
GNMT
GNPAT
GNPDA1
GNPDA2
GNPNAT1
GOT1
GOT2
GPAM
GPAT2
GPAT3
GPAT4
GPD1
GPD1L
GPD2
GPI
GPT
GPT2
GPX1
GPX2
GPX3
GPX4
GPX5
GPX6
GPX7
GRHPR
GSR
GSS
GSTA1
GSTA2
GSTA3
GSTA4
GSTA5
GSTK1
GSTM1
GSTM2
GSTM3
GSTM4
GSTM5
GSTO1
GSTO2
GSTP1
GSTT1
GSTT2
GSTZ1
GUCY1A1
GUCY1A2
GUCY1B1
GUCY2C
GUCY2D
GUCY2F
GUK1
GUSB
GYS1
GYS2
HAAO
HADH
HADHA
HADHB
HAGH
HAGHL
HAL
HAO1
HAO2
HCCS
HDC
HEMK1
HEXA
HEXB
HGD
HIBCH
HK1
HK2
HK3
HMBS
HMGCL
HMGCS1
HMGCS2
HMOX1
HMOX2
HNMT
HPD
HPGDS
HPRT1
HYI
IDH1
IDH2
IDO1
IDO2
IL4I1
IMPA1
IMPA2
IMPDH1
IMPDH2
INMT
INPP1
INPP4A
INPP4B
INPP5A
INPP5B
INPP5E
INPP5J
INPP5K
INPPL1
IPMK
IPPK
ISYNA1
ITPA
ITPK1
ITPKA
ITPKB
JMJD7-PLA2G4B
KDSR
KHK
KMO
KYNU
L2HGDH
LALBA
LAP3
LCAT
LCLAT1
LCMT1
LCMT2
LCT
LDHA
LDHAL6A
LDHAL6B
LDHB
LDHC
LDHD
LIPC
LIPF
LIPG
LPCAT1
LPCAT2
LPCAT3
LPCAT4
LPGAT1
LPL
LRAT
LTA4H
LTC4S
LYPLA1
LYPLA2
MAOA
MAOB
MARS
MARS2
MAT1A
MAT2A
MAT2B
MBOAT1
MBOAT2
MBOAT7
MCEE
MDH1
MDH2
ME1
ME2
ME3
METTL2B
METTL6
MGAM
MGLL
MGST1
MGST2
MGST3
MIF
MINPP1
MIOX
MLYCD
MMAB
MMUT
MPI
MPST
MTAP
MTHFD1
MTHFD1L
MTHFD2
MTHFD2L
MTMR1
MTMR2
MTMR6
MTMR7
MTR
NAA80
NADK
NADSYN1
NAGK
NAGS
NAMPT
NANP
NANS
NAT1
NAT2
NEU1
NEU2
NEU3
NEU4
NIT2
NME1
NME1-NME2
NME2
NME3
NME4
NME5
NME6
NME7
NMNAT1
NMNAT2
NMNAT3
NMRK1
NNMT
NNT
NOS1
NOS2
NOS3
NPL
NPR1
NPR2
NT5C
NT5C1A
NT5C1B
NT5C2
NT5C3A
NT5E
NT5M
NUDT12
NUDT2
NUDT5
NUDT9
OAT
OCRL
ODC1
OGDH
OGDHL
OPLAH
OTC
OXCT1
OXCT2
P4HA1
P4HA2
P4HA3
PAFAH1B1
PAFAH1B2
PAFAH1B3
PAFAH2
PAH
PAICS
PAPSS1
PAPSS2
PC
PCCA
PCCB
PCK1
PCK2
PCYT1A
PCYT1B
PCYT2
PDE10A
PDE11A
PDE1A
PDE1B
PDE1C
PDE2A
PDE3A
PDE3B
PDE4A
PDE4B
PDE4D
PDE5A
PDE6A
PDE6B
PDE6C
PDE6D
PDE7A
PDE7B
PDE8A
PDE8B
PDE9A
PDHA1
PDHA2
PDHB
PEMT
PFAS
PFKFB1
PFKFB2
PFKFB3
PFKFB4
PFKL
PFKM
PFKP
PGD
PGM1
PGM2
PGM2L1
PGM3
PGP
PGS1
PHGDH
PHOSPHO1
PHPT1
PI4KA
PI4KB
PIK3C2A
PIK3C2B
PIK3C2G
PIK3C3
PIK3CA
PIK3CB
PIK3CD
PIK3CG
PIKFYVE
PIP4K2A
PIP4K2B
PIP4K2C
PIP5K1A
PIP5K1B
PIP5K1C
PIPOX
PISD
PKLR
PKM
PLA2G10
PLA2G12A
PLA2G12B
PLA2G15
PLA2G1B
PLA2G2A
PLA2G2C
PLA2G2D
PLA2G2E
PLA2G2F
PLA2G3
PLA2G4A
PLA2G4B
PLA2G4E
PLA2G5
PLA2G6
PLA2G7
PLCB1
PLCB2
PLCB3
PLCB4
PLCD1
PLCD3
PLCD4
PLCE1
PLCG1
PLCG2
PLCZ1
PLD1
PLD2
PLPP1
PLPP2
PLPP3
PMM1
PMM2
PNLIP
PNLIPRP1
PNLIPRP2
PNMT
PNP
PNPLA3
PNPLA4
PNPT1
POLA1
POLA2
POLD1
POLD2
POLD3
POLD4
POLE
POLE2
POLE3
POLE4
POLR1A
POLR1B
POLR1C
POLR1D
POLR1E
POLR2A
POLR2B
POLR2C
POLR2D
POLR2E
POLR2F
POLR2G
POLR2H
POLR2I
POLR2J
POLR2J2
POLR2J3
POLR2K
POLR2L
POLR3A
POLR3B
POLR3C
POLR3D
POLR3F
POLR3G
POLR3GL
POLR3H
POLR3K
PPAT
PPOX
PRDX6
PRIM1
PRIM2
PRODH
PRODH2
PRPS1
PRPS1L1
PRPS2
PRUNE1
PSAT1
PSPH
PTDSS1
PTDSS2
PTEN
PTGDS
PTGES
PTGES2
PTGIS
PTGS1
PTGS2
PYCR1
PYCR2
PYCR3
PYGB
PYGL
PYGM
QPRT
RDH10
RDH11
RDH12
RDH16
RDH5
RDH8
RENBP
RETSAT
RFK
RPE65
RRM1
RRM2
RRM2B
SARDH
SAT1
SAT2
SCLY
SDS
SEPHS1
SEPHS2
SGMS1
SGMS2
SGPL1
SGPP1
SGPP2
SHMT1
SHMT2
SI
SMPD1
SMPD2
SMPD3
SMPD4
SMS
SORD
SPHK1
SPHK2
SPTLC1
SPTLC2
SRM
SRR
SUCLA2
SUCLG1
SUCLG2
SUCLG2P2
SULT1A1
SULT1A2
SULT1A3
SULT1A4
SULT1E1
SULT2B1
SUOX
SYNJ1
SYNJ2
TAT
TAZ
TBXAS1
TDO2
TH
TK1
TK2
TKFC
TPH1
TPH2
TPI1
TPMT
TPO
TRDMT1
TREH
TRMT11
TSTA3
TXNDC12
TXNRD1
TXNRD2
TYMP
TYMS
TYR
TYRP1
UAP1
UCK1
UCK2
UCKL1
UGCG
UGDH
UGP2
UGT1A1
UGT1A10
UGT1A3
UGT1A4
UGT1A5
UGT1A6
UGT1A7
UGT1A8
UGT1A9
UGT2A1
UGT2A3
UGT2B10
UGT2B11
UGT2B15
UGT2B17
UGT2B28
UGT2B4
UGT2B7
UGT8
UMPS
UPB1
UPP1
UPP2
UPRT
URAD
UROC1
UROD
UROS
UXS1
WARS
WARS2
XDH
ZNRD1

## Sheet: Table S2
Supplementary Table-S2:The 106 metabolism associated genes with cox p<0.001 and mad > 0.5 used for classification
id	HR	HR.95L	HR.95H	pvalue
UCKL1	2.1017	1.62083	2.72523	2.10407e-08
TDO2	0.77429	0.710204	0.844159	6.50168e-09
SRM	1.48094	1.28009	1.71329	1.28619e-07
SORD	1.34918	1.17943	1.54336	1.2688e-05
RETSAT	1.61888	1.26678	2.06884	0.000118195
RDH10	0.773001	0.673616	0.88705	0.000245506
PTGS1	0.815174	0.73062	0.909513	0.00025466
PTGIS	0.884988	0.830395	0.943171	0.000169274
PTGES2	1.32416	1.13436	1.54572	0.000374961
PTGDS	0.81717	0.742857	0.898916	3.31536e-05
PSAT1	1.19351	1.07793	1.3215	0.000664472
PRPS2	0.667693	0.537479	0.829454	0.000262921
PPOX	1.57627	1.27356	1.95093	2.88252e-05
POLR3H	1.39235	1.16593	1.66273	0.000256742
POLR3G	1.34115	1.18844	1.51348	1.9446e-06
POLR1C	1.52799	1.25077	1.86667	3.31697e-05
POLR1A	1.54889	1.27642	1.87952	9.32225e-06
POLD2	1.33906	1.13775	1.57598	0.000443787
PNP	1.36902	1.15978	1.61601	0.000206048
PLPP3	0.759498	0.660928	0.872769	0.00010504
PLPP1	0.623199	0.507008	0.766018	7.0605e-06
PLA2G7	0.781579	0.697476	0.875822	2.20913e-05
PKLR	1.29002	1.14396	1.45473	3.27042e-05
PIK3CG	0.786856	0.710339	0.871615	4.37968e-06
PGP	1.37769	1.15451	1.64402	0.000380441
PFKP	1.42153	1.19022	1.69779	0.000103667
PDE9A	0.835253	0.778513	0.896129	5.29161e-07
PDE6D	0.66086	0.535782	0.815136	0.000109125
PDE4D	0.742824	0.662012	0.833501	4.2119e-07
PDE1A	0.857684	0.782971	0.939527	0.000961951
PCYT2	1.47742	1.21558	1.79565	8.80073e-05
PCK2	1.45859	1.17344	1.81302	0.000671211
PCCA	1.51244	1.23448	1.853	6.5248e-05
PAPSS2	0.701572	0.618183	0.79621	4.02396e-08
PAPSS1	0.712061	0.581734	0.871585	0.000992862
PAICS	1.46281	1.21616	1.75948	5.41344e-05
P4HA2	0.812132	0.739226	0.892229	1.45029e-05
OAT	0.668388	0.582573	0.766844	9.11513e-09
NT5E	0.758493	0.678197	0.848296	1.28682e-06
NT5C	1.31257	1.15391	1.49303	3.50369e-05
NNMT	0.766536	0.693146	0.847696	2.24459e-07
NMRK1	0.736768	0.619566	0.876141	0.000548623
NAT1	0.641822	0.520376	0.791611	3.42067e-05
NANS	0.726787	0.605403	0.872509	0.000619976
MTMR6	0.716269	0.587707	0.872954	0.000946016
MPST	1.5953	1.32509	1.92061	8.10832e-07
MPI	1.52463	1.27556	1.82233	3.58008e-06
MIOX	1.21412	1.10586	1.33298	4.66663e-05
MBOAT2	0.677518	0.571016	0.803884	8.127e-06
MARS2	1.38405	1.15203	1.6628	0.000517132
LYPLA2	1.37559	1.14929	1.64644	0.000506476
LPCAT4	1.31235	1.15595	1.48992	2.69034e-05
LCMT2	0.716476	0.612377	0.838271	3.1501e-05
KYNU	0.723182	0.639419	0.817919	2.46896e-07
KMO	0.839046	0.757118	0.92984	0.000815161
IMPDH2	1.49227	1.23822	1.79845	2.62242e-05
HNMT	0.715342	0.632954	0.808455	8.05986e-08
HK2	1.40193	1.22953	1.5985	4.50193e-07
GUCY1B1	0.684703	0.601786	0.779045	8.86544e-09
GUCY1A1	0.732988	0.660815	0.813044	4.26865e-09
GSTM3	0.756396	0.670817	0.852892	5.17797e-06
GSTA4	0.785236	0.684999	0.900141	0.000520815
GSTA1	1.58616	1.21998	2.06226	0.000571829
GPT2	1.33032	1.18934	1.48802	5.92483e-07
GNPDA1	1.71754	1.34769	2.18889	1.23306e-05
GLO1	1.91246	1.48785	2.45826	4.15344e-07
GFPT2	0.828529	0.7526	0.912118	0.000125221
GDA	1.26615	1.11428	1.43872	0.00029482
GCLC	1.74458	1.44414	2.10752	7.87037e-09
GALT	1.66719	1.31539	2.11307	2.36811e-05
GALE	1.53152	1.22552	1.91394	0.000178144
GAL3ST1	1.16699	1.06832	1.27478	0.000612385
FMO3	0.836375	0.760924	0.919309	0.000212137
FBP1	0.865132	0.800402	0.935098	0.000261062
ENTPD6	1.34751	1.13117	1.60521	0.000836564
ENPP2	0.751441	0.672014	0.840255	5.34238e-07
ENPP1	0.764356	0.691234	0.845214	1.62563e-07
ECI1	1.65317	1.34058	2.03864	2.59078e-06
DPYD	0.777598	0.691946	0.873851	2.39308e-05
DGKE	1.34146	1.14421	1.57271	0.000294562
DEGS1	0.606753	0.518873	0.709518	3.88179e-10
DCTD	1.80604	1.43407	2.27451	5.06619e-07
CYP2C9	1.3217	1.16669	1.49731	1.17461e-05
CTPS1	1.4214	1.18011	1.71202	0.000211601
CTH	1.17167	1.07906	1.27224	0.000162628
CPT1A	1.49991	1.29851	1.73256	3.5745e-08
CNDP1	1.21216	1.08849	1.34989	0.000457979
CMPK2	0.841033	0.763292	0.926691	0.000467882
CHKA	1.28375	1.1464	1.43756	1.51527e-05
CHIT1	0.903964	0.861081	0.948983	4.66797e-05
CA7	1.2129	1.08427	1.35678	0.000739628
CA6	1.21771	1.08334	1.36874	0.000960348
CA1	1.18164	1.08526	1.28658	0.000120707
BPNT1	0.638489	0.55388	0.736022	6.18006e-10
BDH1	1.40878	1.21142	1.6383	8.56746e-06
B4GALT2	1.50506	1.24297	1.82241	2.8139e-05
AZIN2	0.745425	0.648865	0.856354	3.31315e-05
ASL	1.34112	1.13126	1.58991	0.000723594
ASAH1	0.65172	0.517691	0.820448	0.000267712
AMPD3	0.640476	0.53473	0.767135	1.30317e-06
ALDH2	0.6891	0.615277	0.771782	1.18909e-10
AKR1C3	0.870574	0.809426	0.936342	0.000191392
ADH1B	1.11059	1.05318	1.17114	0.000107367
ADCY9	0.796664	0.705843	0.899171	0.000232371
ACOX1	0.695677	0.571647	0.846618	0.000292447
ACADVL	1.30977	1.14	1.50483	0.000139046

## Sheet: Table S3
Supplementary Table-S3: Corresponding sample grouping of metabolic subtypes in metadata set
sampleID	group
GSM1300747	nmftype2
GSM1300748	nmftype1
GSM1300749	nmftype1
GSM1300750	nmftype1
GSM1300751	nmftype1
GSM2328918	nmftype1
GSM2328919	nmftype1
GSM2328920	nmftype1
GSM2328921	nmftype2
GSM2328922	nmftype2
GSM2328923	nmftype1
GSM2328924	nmftype1
GSM2328925	nmftype2
GSM2328926	nmftype2
GSM2328927	nmftype2
GSM2328928	nmftype1
GSM2328929	nmftype1
GSM2328930	nmftype1
GSM2328931	nmftype2
GSM2328932	nmftype2
GSM2328933	nmftype2
GSM2328934	nmftype1
GSM2328935	nmftype2
GSM2328936	nmftype1
GSM2328937	nmftype2
GSM2328938	nmftype1
GSM2328939	nmftype1
GSM2328940	nmftype2
GSM2328941	nmftype1
GSM2328942	nmftype2
GSM2328943	nmftype2
GSM2328944	nmftype1
GSM2328945	nmftype1
GSM2328946	nmftype1
GSM2328947	nmftype2
GSM2328948	nmftype2
GSM2328949	nmftype1
GSM2328950	nmftype1
GSM2328951	nmftype1
GSM2328952	nmftype1
GSM2328953	nmftype1
GSM2328954	nmftype2
GSM2328955	nmftype1
GSM2328956	nmftype1
GSM2328957	nmftype2
GSM2328958	nmftype2
GSM2328959	nmftype1
GSM2328960	nmftype2
GSM2328961	nmftype2
GSM2328962	nmftype2
GSM2328963	nmftype2
GSM2328964	nmftype2
GSM2328965	nmftype2
GSM2328966	nmftype1
GSM2328967	nmftype2
GSM2328968	nmftype1
GSM2328969	nmftype1
GSM2328970	nmftype2
GSM2328971	nmftype1
GSM2328972	nmftype2
GSM2328973	nmftype1
GSM2328974	nmftype1
GSM2328975	nmftype1
GSM2328976	nmftype2
GSM2328977	nmftype1
GSM2328978	nmftype1
GSM2328979	nmftype1
GSM2328980	nmftype1
GSM2328981	nmftype1
GSM2328982	nmftype2
GSM2328983	nmftype1
GSM2328984	nmftype1
GSM2328985	nmftype1
GSM2328986	nmftype1
GSM2328987	nmftype1
GSM2328988	nmftype1
GSM2328989	nmftype1
GSM2328990	nmftype2
GSM2328991	nmftype2
GSM2328992	nmftype1
GSM2328993	nmftype1
GSM2328994	nmftype1
GSM2328995	nmftype1
GSM2328996	nmftype2
GSM2328997	nmftype1
GSM2328998	nmftype2
GSM2328999	nmftype1
GSM2329000	nmftype1
GSM2329001	nmftype1
GSM2329002	nmftype2
GSM2329003	nmftype2
GSM2329004	nmftype2
GSM2329005	nmftype1
GSM2329006	nmftype2
GSM2329008	nmftype2
GSM2329009	nmftype1
GSM2329010	nmftype1
GSM2329011	nmftype1
GSM2329012	nmftype2
GSM2329013	nmftype2
GSM2329014	nmftype1
GSM2329015	nmftype1
GSM2329016	nmftype2
GSM2329017	nmftype1
GSM2329018	nmftype1
GSM2329019	nmftype1
GSM2329020	nmftype2
GSM2329021	nmftype1
GSM2329022	nmftype1
GSM2329023	nmftype1
GSM2329024	nmftype2
GSM2329025	nmftype1
GSM2329026	nmftype1
GSM2329027	nmftype1
GSM2329028	nmftype1
GSM2329029	nmftype1
GSM2329030	nmftype1
GSM2329031	nmftype1
GSM2329032	nmftype1
GSM2329033	nmftype1
GSM2329034	nmftype1
GSM2329035	nmftype1
GSM2329036	nmftype1
GSM2329037	nmftype1
GSM2329038	nmftype1
GSM2329039	nmftype1
GSM2329040	nmftype1
GSM2329041	nmftype1
GSM2329042	nmftype2
GSM2329043	nmftype1
GSM2329044	nmftype2
GSM2329045	nmftype1
GSM2329046	nmftype1
GSM2329047	nmftype1
GSM2329048	nmftype2
GSM2329049	nmftype2
GSM2329050	nmftype1
GSM2329051	nmftype2
GSM2329052	nmftype1
GSM2329053	nmftype2
GSM2329054	nmftype1
GSM2329055	nmftype1
GSM2329056	nmftype1
GSM2329057	nmftype2
GSM2329058	nmftype1
GSM2329059	nmftype2
GSM2329060	nmftype2
GSM2329061	nmftype2
GSM2329062	nmftype1
GSM2329063	nmftype2
GSM2329064	nmftype2
GSM2329065	nmftype2
GSM2329066	nmftype1
GSM2329067	nmftype1
GSM2329068	nmftype1
GSM2329069	nmftype2
GSM2329070	nmftype1
GSM2329071	nmftype1
GSM2329072	nmftype1
GSM2329073	nmftype1
GSM2329074	nmftype2
GSM2329075	nmftype2
GSM2329076	nmftype2
GSM2329077	nmftype2
GSM2329078	nmftype1
GSM2329079	nmftype1
GSM2329080	nmftype2
GSM2329081	nmftype1
GSM2329082	nmftype1
GSM2329083	nmftype1
GSM2329084	nmftype2
GSM2329085	nmftype1
GSM2329086	nmftype1
GSM2329087	nmftype1
GSM2329088	nmftype1
GSM2329089	nmftype2
GSM2329090	nmftype1
GSM2329091	nmftype1
GSM2329092	nmftype1
GSM2329093	nmftype1
GSM2329094	nmftype1
GSM2329095	nmftype1
GSM2329096	nmftype1
GSM2329097	nmftype1
GSM2329098	nmftype2
GSM2329099	nmftype1
GSM2329100	nmftype1
GSM2329101	nmftype1
GSM2329102	nmftype2
GSM2329103	nmftype2
GSM2329104	nmftype2
GSM2329105	nmftype1
GSM2329106	nmftype1
GSM2329107	nmftype1
GSM2329108	nmftype1
GSM2329109	nmftype1
GSM2329110	nmftype1
GSM2329111	nmftype2
GSM2329112	nmftype1
GSM2329113	nmftype1
GSM2329114	nmftype2
GSM2329115	nmftype1
GSM2329116	nmftype1
GSM2329117	nmftype2
GSM2329118	nmftype2
GSM2329119	nmftype2
GSM2329120	nmftype1
GSM2329121	nmftype1
GSM2329122	nmftype1
GSM2329123	nmftype1
GSM2329124	nmftype1
GSM2329125	nmftype1
GSM2329126	nmftype2
GSM2329127	nmftype1
GSM2329128	nmftype1
GSM2329129	nmftype1
GSM2329130	nmftype1
GSM2329131	nmftype2
GSM2329132	nmftype1
GSM2329134	nmftype1
GSM2329135	nmftype1
GSM2329136	nmftype1
GSM2329137	nmftype2
GSM2329138	nmftype1
GSM2329139	nmftype1
GSM2329140	nmftype2
GSM274895	nmftype1
GSM274896	nmftype1
GSM274897	nmftype1
GSM274898	nmftype1
GSM274899	nmftype1
GSM274900	nmftype1
GSM274901	nmftype1
GSM274902	nmftype1
GSM274903	nmftype1
GSM274904	nmftype1
GSM274905	nmftype1
GSM274906	nmftype1
GSM274907	nmftype1
GSM274908	nmftype1
GSM274909	nmftype1
GSM274910	nmftype1
GSM274911	nmftype1
GSM274912	nmftype1
GSM274913	nmftype1
GSM274914	nmftype1
GSM274915	nmftype1
GSM274916	nmftype1
GSM274917	nmftype1
GSM274918	nmftype1
GSM274919	nmftype1
GSM274920	nmftype1
GSM274921	nmftype1
GSM274922	nmftype1
GSM274923	nmftype1
GSM274924	nmftype1
GSM274925	nmftype1
GSM274926	nmftype1
GSM274927	nmftype2
GSM274928	nmftype1
GSM274929	nmftype2
GSM274930	nmftype1
GSM274931	nmftype1
GSM274932	nmftype1
GSM274933	nmftype1
GSM274934	nmftype1
GSM274935	nmftype1
GSM274936	nmftype1
GSM274937	nmftype1
GSM274938	nmftype1
GSM274939	nmftype1
GSM274940	nmftype1
GSM274941	nmftype1
GSM274942	nmftype1
GSM274943	nmftype1
GSM274944	nmftype1
GSM274945	nmftype1
GSM274946	nmftype1
GSM274947	nmftype1
GSM274948	nmftype1
GSM274949	nmftype1
GSM274950	nmftype1
GSM274951	nmftype1
GSM274952	nmftype1
GSM274953	nmftype1
GSM274954	nmftype1
GSM274955	nmftype1
GSM274956	nmftype1
GSM274957	nmftype1
GSM274958	nmftype1
GSM274959	nmftype1
GSM274960	nmftype1
GSM274961	nmftype1
GSM274962	nmftype1
GSM274963	nmftype2
GSM274964	nmftype1
GSM274965	nmftype1
GSM274966	nmftype1
GSM274967	nmftype1
GSM274968	nmftype1
GSM274969	nmftype1
GSM274970	nmftype1
GSM274971	nmftype1
GSM274972	nmftype1
GSM274973	nmftype1
GSM274974	nmftype1
GSM274975	nmftype1
GSM274976	nmftype2
GSM274977	nmftype1
GSM274978	nmftype1
GSM274979	nmftype1
GSM274980	nmftype1
GSM274981	nmftype1
GSM274982	nmftype2
GSM274983	nmftype1
GSM274984	nmftype1
GSM274985	nmftype1
GSM274986	nmftype1
GSM274987	nmftype1
GSM274988	nmftype1
GSM274989	nmftype1
GSM274990	nmftype1
GSM274991	nmftype2
GSM274992	nmftype1
GSM274993	nmftype1
GSM274994	nmftype1
GSM274995	nmftype1
GSM274996	nmftype1
GSM274997	nmftype1
GSM274998	nmftype1
GSM274999	nmftype1
GSM275000	nmftype1
GSM275001	nmftype1
GSM275002	nmftype1
GSM275003	nmftype1
GSM275004	nmftype1
GSM275005	nmftype1
GSM275006	nmftype2
GSM275007	nmftype1
GSM275008	nmftype1
GSM275009	nmftype1
GSM275010	nmftype1
GSM275011	nmftype1
GSM275012	nmftype2
GSM275013	nmftype1
GSM275014	nmftype1
GSM275015	nmftype1
GSM275016	nmftype1
GSM275017	nmftype1
GSM275018	nmftype1
GSM275019	nmftype1
GSM275020	nmftype1
GSM275021	nmftype2
GSM275022	nmftype1
GSM275023	nmftype1
GSM275024	nmftype2
GSM275025	nmftype1
GSM275026	nmftype1
GSM275027	nmftype1
GSM275028	nmftype1
GSM275029	nmftype1
GSM275030	nmftype1
GSM275031	nmftype1
GSM275032	nmftype1
GSM275033	nmftype1
GSM275034	nmftype1
GSM275035	nmftype1
GSM275036	nmftype1
GSM275037	nmftype1
GSM275038	nmftype2
GSM275039	nmftype1
GSM275040	nmftype1
GSM275041	nmftype1
GSM275042	nmftype1
GSM275043	nmftype2
GSM275044	nmftype1
GSM275045	nmftype1
GSM275046	nmftype1
GSM275047	nmftype1
GSM275048	nmftype1
GSM275049	nmftype1
GSM275050	nmftype2
GSM275051	nmftype1
GSM275052	nmftype1
GSM275053	nmftype1
GSM275054	nmftype1
GSM275055	nmftype2
GSM275056	nmftype1
GSM275057	nmftype1
GSM275058	nmftype1
GSM275059	nmftype1
GSM275060	nmftype1
GSM275061	nmftype1
GSM275062	nmftype1
GSM275063	nmftype1
GSM275064	nmftype2
GSM275065	nmftype1
GSM275066	nmftype1
GSM275067	nmftype1
GSM275068	nmftype2
GSM275069	nmftype1
GSM275070	nmftype1
GSM275071	nmftype1
GSM275072	nmftype1
GSM275073	nmftype1
GSM275074	nmftype1
GSM275075	nmftype1
GSM275076	nmftype2
GSM275077	nmftype2
GSM275078	nmftype2
GSM275079	nmftype2
GSM275080	nmftype1
GSM275081	nmftype2
GSM275082	nmftype2
GSM275083	nmftype2
GSM275084	nmftype1
GSM275085	nmftype1
GSM275086	nmftype2
GSM275087	nmftype1
GSM275088	nmftype1
GSM275089	nmftype1
GSM275090	nmftype2
GSM275091	nmftype2
GSM275092	nmftype2
GSM275093	nmftype2
GSM275094	nmftype2
GSM275095	nmftype2
GSM275096	nmftype1
GSM275097	nmftype2
GSM275098	nmftype1
GSM275099	nmftype1
GSM275100	nmftype1
GSM275101	nmftype2
GSM275102	nmftype2
GSM275103	nmftype2
GSM275104	nmftype1
GSM275105	nmftype2
GSM275106	nmftype2
GSM275107	nmftype2
GSM275108	nmftype1
GSM275109	nmftype2
GSM275110	nmftype2
GSM275111	nmftype2
GSM275112	nmftype2
GSM275113	nmftype2
GSM275114	nmftype2
GSM275115	nmftype2
GSM275116	nmftype1
GSM275117	nmftype1
GSM275118	nmftype2
GSM275119	nmftype1
GSM275120	nmftype1
GSM275121	nmftype2
GSM275122	nmftype2
GSM275123	nmftype2
GSM275124	nmftype1
GSM275125	nmftype1
GSM275126	nmftype2
GSM275127	nmftype2
GSM275128	nmftype1
GSM275129	nmftype2
GSM275130	nmftype1
GSM275131	nmftype1
GSM275132	nmftype1
GSM275133	nmftype1
GSM275134	nmftype2
GSM275135	nmftype1
GSM275136	nmftype2
GSM275137	nmftype2
GSM275138	nmftype2
GSM275139	nmftype1
GSM275140	nmftype2
GSM275141	nmftype1
GSM275142	nmftype2
GSM275143	nmftype1
GSM275144	nmftype2
GSM275145	nmftype1
GSM275146	nmftype1
GSM275147	nmftype2
GSM275148	nmftype2
GSM275149	nmftype2
GSM275150	nmftype1
GSM275151	nmftype1
GSM275152	nmftype1
GSM275153	nmftype2
GSM275154	nmftype2
GSM275155	nmftype1
GSM275156	nmftype2
GSM275157	nmftype2
GSM275158	nmftype2
GSM275159	nmftype2
GSM275160	nmftype1
GSM275161	nmftype1
GSM275162	nmftype2
GSM275163	nmftype2
GSM275164	nmftype2
GSM275165	nmftype2
GSM275166	nmftype2
GSM275167	nmftype2
GSM275168	nmftype2
GSM275169	nmftype2
GSM275170	nmftype2
GSM275171	nmftype2
GSM275172	nmftype2
GSM275173	nmftype2
GSM275174	nmftype2
GSM275175	nmftype1
GSM275176	nmftype2
GSM275177	nmftype2
GSM275178	nmftype2
GSM275179	nmftype1
GSM275180	nmftype2
GSM275181	nmftype2
GSM275182	nmftype2
GSM275183	nmftype2
GSM275184	nmftype1
GSM275185	nmftype1
GSM275186	nmftype2
GSM275187	nmftype2
GSM275188	nmftype2
GSM275189	nmftype2
GSM275190	nmftype2
GSM275191	nmftype1
GSM275192	nmftype2
GSM275193	nmftype2
GSM275194	nmftype1
GSM275195	nmftype2
GSM275196	nmftype2
GSM275197	nmftype2
GSM275198	nmftype2
GSM275199	nmftype1
GSM275200	nmftype2
GSM275201	nmftype2
GSM275202	nmftype2
GSM275203	nmftype2
GSM275204	nmftype2
GSM275205	nmftype2
GSM275206	nmftype2
GSM275207	nmftype1
GSM275208	nmftype2
GSM275209	nmftype2
GSM275210	nmftype2
GSM275211	nmftype2
GSM275212	nmftype1
GSM275213	nmftype1
GSM275214	nmftype2
GSM275215	nmftype2
GSM275216	nmftype1
GSM275217	nmftype1
GSM275218	nmftype2
GSM275219	nmftype2
GSM275220	nmftype1
GSM275221	nmftype1
GSM275222	nmftype2
GSM275223	nmftype2
GSM275224	nmftype2
GSM275225	nmftype2
GSM275226	nmftype1
GSM275227	nmftype1
GSM275228	nmftype2
GSM275229	nmftype1
GSM275230	nmftype2
GSM275231	nmftype2
GSM275232	nmftype1
GSM275233	nmftype2
GSM275234	nmftype2
GSM275235	nmftype2
GSM275236	nmftype2
GSM275237	nmftype1
GSM275238	nmftype1
GSM275239	nmftype1
GSM275240	nmftype1
GSM275241	nmftype1
GSM275242	nmftype1
GSM275243	nmftype2
GSM275244	nmftype2
GSM275245	nmftype2
GSM275246	nmftype2
GSM275247	nmftype1
GSM275248	nmftype2
GSM275249	nmftype1
GSM275250	nmftype2
GSM275251	nmftype2
GSM275252	nmftype1
GSM275253	nmftype2
GSM275254	nmftype2
GSM275255	nmftype2
GSM275256	nmftype1
GSM275257	nmftype2
GSM275258	nmftype2
GSM275259	nmftype2
GSM275260	nmftype2
GSM275261	nmftype2
GSM275262	nmftype2
GSM275263	nmftype2
GSM275264	nmftype2
GSM275265	nmftype2
GSM275266	nmftype1
GSM275267	nmftype1
GSM275268	nmftype2
GSM275269	nmftype1
GSM275270	nmftype1
GSM275271	nmftype1
GSM275272	nmftype1
GSM275273	nmftype1
GSM275274	nmftype2
GSM275275	nmftype1
GSM275276	nmftype2
GSM275277	nmftype2
GSM275278	nmftype2
GSM275279	nmftype1
GSM275280	nmftype2
GSM275281	nmftype2
GSM275282	nmftype1
GSM275283	nmftype1
GSM275284	nmftype1
GSM275285	nmftype1
GSM275286	nmftype1
GSM275287	nmftype2
GSM275288	nmftype2
GSM275289	nmftype2
GSM275290	nmftype1
GSM275291	nmftype1
GSM275292	nmftype1
GSM275293	nmftype1
GSM275294	nmftype2
GSM275295	nmftype1
GSM275296	nmftype1
GSM275297	nmftype1
GSM275298	nmftype2
GSM275299	nmftype1
GSM275300	nmftype1
GSM275301	nmftype2
GSM275302	nmftype2
GSM275303	nmftype2
GSM275304	nmftype2
GSM275305	nmftype1
GSM275306	nmftype2
GSM275307	nmftype1
GSM275308	nmftype2
GSM286852	nmftype1
GSM286854	nmftype1
GSM286855	nmftype2
GSM286856	nmftype1
GSM286857	nmftype1
GSM286858	nmftype2
GSM286859	nmftype1
GSM286860	nmftype2
GSM286861	nmftype2
GSM286862	nmftype1
GSM286863	nmftype1
GSM286864	nmftype1
GSM286865	nmftype1
GSM286867	nmftype2
GSM286868	nmftype2
GSM286869	nmftype1
GSM286870	nmftype1
GSM286871	nmftype2
GSM286872	nmftype2
GSM286873	nmftype2
GSM286874	nmftype2
GSM286875	nmftype1
GSM286877	nmftype1
GSM286878	nmftype1
GSM286879	nmftype1
GSM286880	nmftype1
GSM286881	nmftype1
GSM286882	nmftype2
GSM286883	nmftype2
GSM286884	nmftype1
GSM286885	nmftype1
GSM286887	nmftype1
GSM286888	nmftype2
GSM286889	nmftype1
GSM286890	nmftype1
GSM286891	nmftype1
GSM286892	nmftype1
GSM575635	nmftype1
GSM575636	nmftype1
GSM575637	nmftype1
GSM575638	nmftype1
GSM575639	nmftype1
GSM575640	nmftype1
GSM575641	nmftype1
GSM575642	nmftype1
GSM575644	nmftype2
GSM575645	nmftype1
GSM575646	nmftype1
GSM575647	nmftype1
GSM575648	nmftype1
GSM575649	nmftype2
GSM575650	nmftype2
GSM575651	nmftype1
GSM575652	nmftype2
GSM575653	nmftype1
GSM575654	nmftype1
GSM575655	nmftype2
GSM575656	nmftype1
GSM575657	nmftype2
GSM575658	nmftype1
GSM575659	nmftype1
GSM575660	nmftype1
GSM575661	nmftype2
GSM575662	nmftype2
GSM575663	nmftype1
GSM575664	nmftype1
GSM575665	nmftype2
GSM575666	nmftype1
GSM575667	nmftype1
GSM575668	nmftype1
GSM575669	nmftype1
GSM575670	nmftype1
GSM575671	nmftype1
GSM575672	nmftype1
GSM575673	nmftype2
GSM575674	nmftype1
GSM575675	nmftype1
GSM575676	nmftype2
GSM575677	nmftype1
GSM575678	nmftype2
GSM575679	nmftype2
GSM575680	nmftype1
GSM575681	nmftype2
GSM575682	nmftype2
GSM575683	nmftype1
GSM575684	nmftype1
GSM575685	nmftype1
GSM575686	nmftype1
GSM575687	nmftype2
GSM575688	nmftype2
GSM575689	nmftype2
GSM575690	nmftype1
GSM575691	nmftype1
GSM575692	nmftype1
GSM575693	nmftype2
GSM575694	nmftype1
GSM575696	nmftype1
GSM575697	nmftype1
GSM575698	nmftype2
GSM575700	nmftype2
GSM575702	nmftype1
GSM575703	nmftype1

## Sheet: Table S4
Supplementary Table-S4: Corresponding sample grouping of metabolic subtypes in GSE31312
sample	group
GSM776354	nmftype1
GSM776080	nmftype1
GSM776077	nmftype1
GSM776071	nmftype1
GSM776069	nmftype1
GSM776068	nmftype1
GSM776067	nmftype1
GSM776066	nmftype1
GSM776065	nmftype1
GSM776064	nmftype1
GSM776063	nmftype1
GSM776062	nmftype1
GSM775986	nmftype1
GSM776060	nmftype1
GSM776059	nmftype1
GSM776058	nmftype1
GSM776056	nmftype1
GSM776055	nmftype1
GSM776054	nmftype1
GSM776053	nmftype1
GSM776052	nmftype1
GSM776047	nmftype1
GSM776045	nmftype1
GSM776043	nmftype1
GSM775984	nmftype1
GSM776038	nmftype1
GSM776030	nmftype1
GSM776029	nmftype1
GSM775983	nmftype1
GSM776476	nmftype1
GSM776474	nmftype1
GSM776473	nmftype1
GSM776468	nmftype1
GSM776463	nmftype1
GSM776462	nmftype1
GSM776460	nmftype1
GSM776450	nmftype1
GSM776435	nmftype1
GSM776429	nmftype1
GSM776426	nmftype1
GSM776425	nmftype1
GSM776419	nmftype1
GSM776418	nmftype1
GSM776416	nmftype1
GSM776409	nmftype1
GSM776401	nmftype1
GSM776399	nmftype1
GSM776393	nmftype1
GSM776392	nmftype1
GSM776387	nmftype1
GSM776376	nmftype1
GSM776373	nmftype1
GSM776372	nmftype1
GSM776371	nmftype1
GSM776017	nmftype1
GSM776348	nmftype1
GSM776015	nmftype1
GSM776343	nmftype1
GSM776340	nmftype1
GSM776320	nmftype1
GSM776013	nmftype1
GSM776313	nmftype1
GSM776304	nmftype1
GSM776298	nmftype1
GSM776297	nmftype1
GSM776296	nmftype1
GSM776010	nmftype1
GSM775981	nmftype1
GSM776287	nmftype1
GSM776285	nmftype1
GSM776283	nmftype1
GSM776282	nmftype1
GSM776009	nmftype1
GSM776279	nmftype1
GSM776276	nmftype1
GSM776267	nmftype1
GSM776007	nmftype1
GSM776260	nmftype1
GSM776006	nmftype1
GSM776253	nmftype1
GSM776251	nmftype1
GSM776250	nmftype1
GSM776249	nmftype1
GSM776242	nmftype1
GSM776003	nmftype1
GSM776223	nmftype1
GSM776222	nmftype1
GSM776218	nmftype1
GSM776209	nmftype1
GSM776208	nmftype1
GSM776207	nmftype1
GSM776205	nmftype1
GSM776202	nmftype1
GSM776201	nmftype1
GSM776198	nmftype1
GSM776196	nmftype1
GSM776195	nmftype1
GSM776193	nmftype1
GSM776191	nmftype1
GSM776189	nmftype1
GSM776188	nmftype1
GSM776186	nmftype1
GSM775998	nmftype1
GSM776181	nmftype1
GSM776178	nmftype1
GSM776172	nmftype1
GSM776170	nmftype1
GSM776166	nmftype1
GSM775996	nmftype1
GSM776162	nmftype1
GSM776161	nmftype1
GSM776155	nmftype1
GSM776154	nmftype1
GSM776153	nmftype1
GSM776147	nmftype1
GSM776141	nmftype1
GSM776139	nmftype1
GSM776138	nmftype1
GSM776137	nmftype1
GSM776136	nmftype1
GSM776135	nmftype1
GSM775993	nmftype1
GSM776128	nmftype1
GSM776124	nmftype1
GSM776123	nmftype1
GSM775992	nmftype1
GSM776118	nmftype1
GSM775991	nmftype1
GSM776100	nmftype1
GSM776099	nmftype1
GSM776096	nmftype1
GSM776094	nmftype1
GSM775989	nmftype1
GSM776091	nmftype1
GSM776090	nmftype1
GSM776083	nmftype1
GSM776087	nmftype1
GSM776072	nmftype1
GSM776031	nmftype1
GSM776454	nmftype1
GSM776413	nmftype1
GSM776396	nmftype1
GSM776365	nmftype1
GSM776311	nmftype1
GSM776292	nmftype1
GSM776254	nmftype1
GSM776231	nmftype1
GSM776226	nmftype1
GSM776116	nmftype1
GSM776203	nmftype1
GSM776360	nmftype1
GSM776175	nmftype1
GSM776084	nmftype1
GSM776466	nmftype1
GSM775988	nmftype1
GSM776097	nmftype1
GSM776125	nmftype1
GSM776108	nmftype1
GSM776459	nmftype1
GSM776414	nmftype1
GSM776113	nmftype1
GSM776185	nmftype1
GSM776157	nmftype1
GSM776356	nmftype1
GSM776442	nmftype2
GSM776011	nmftype2
GSM776411	nmftype2
GSM776431	nmftype2
GSM776382	nmftype2
GSM776165	nmftype2
GSM776121	nmftype2
GSM776146	nmftype2
GSM776168	nmftype2
GSM776081	nmftype2
GSM776078	nmftype2
GSM776076	nmftype2
GSM776074	nmftype2
GSM776073	nmftype2
GSM776070	nmftype2
GSM775987	nmftype2
GSM776057	nmftype2
GSM776048	nmftype2
GSM776046	nmftype2
GSM776044	nmftype2
GSM776042	nmftype2
GSM776041	nmftype2
GSM776040	nmftype2
GSM776037	nmftype2
GSM776036	nmftype2
GSM776035	nmftype2
GSM776034	nmftype2
GSM776033	nmftype2
GSM776032	nmftype2
GSM776028	nmftype2
GSM776027	nmftype2
GSM776472	nmftype2
GSM776026	nmftype2
GSM776470	nmftype2
GSM776469	nmftype2
GSM776467	nmftype2
GSM776465	nmftype2
GSM776464	nmftype2
GSM776461	nmftype2
GSM776025	nmftype2
GSM776458	nmftype2
GSM776457	nmftype2
GSM776456	nmftype2
GSM776455	nmftype2
GSM776453	nmftype2
GSM776452	nmftype2
GSM776451	nmftype2
GSM776024	nmftype2
GSM776449	nmftype2
GSM776448	nmftype2
GSM776447	nmftype2
GSM776446	nmftype2
GSM776445	nmftype2
GSM776444	nmftype2
GSM776443	nmftype2
GSM776441	nmftype2
GSM776023	nmftype2
GSM776438	nmftype2
GSM776437	nmftype2
GSM776436	nmftype2
GSM776434	nmftype2
GSM776432	nmftype2
GSM776430	nmftype2
GSM776022	nmftype2
GSM776428	nmftype2
GSM776427	nmftype2
GSM776424	nmftype2
GSM776423	nmftype2
GSM776421	nmftype2
GSM776420	nmftype2
GSM776021	nmftype2
GSM776417	nmftype2
GSM776415	nmftype2
GSM776412	nmftype2
GSM776410	nmftype2
GSM776408	nmftype2
GSM776020	nmftype2
GSM776407	nmftype2
GSM776406	nmftype2
GSM776405	nmftype2
GSM776404	nmftype2
GSM776403	nmftype2
GSM776400	nmftype2
GSM776398	nmftype2
GSM776397	nmftype2
GSM776019	nmftype2
GSM775982	nmftype2
GSM776395	nmftype2
GSM776394	nmftype2
GSM776391	nmftype2
GSM776390	nmftype2
GSM776389	nmftype2
GSM776388	nmftype2
GSM776386	nmftype2
GSM776384	nmftype2
GSM776383	nmftype2
GSM776381	nmftype2
GSM776380	nmftype2
GSM776379	nmftype2
GSM776378	nmftype2
GSM776377	nmftype2
GSM776018	nmftype2
GSM776375	nmftype2
GSM776374	nmftype2
GSM776370	nmftype2
GSM776369	nmftype2
GSM776368	nmftype2
GSM776367	nmftype2
GSM776366	nmftype2
GSM776364	nmftype2
GSM776362	nmftype2
GSM776361	nmftype2
GSM776358	nmftype2
GSM776357	nmftype2
GSM776016	nmftype2
GSM776353	nmftype2
GSM776352	nmftype2
GSM776350	nmftype2
GSM776349	nmftype2
GSM776347	nmftype2
GSM776346	nmftype2
GSM776345	nmftype2
GSM776344	nmftype2
GSM776342	nmftype2
GSM776341	nmftype2
GSM776339	nmftype2
GSM776338	nmftype2
GSM776336	nmftype2
GSM776335	nmftype2
GSM776334	nmftype2
GSM776014	nmftype2
GSM776333	nmftype2
GSM776332	nmftype2
GSM776331	nmftype2
GSM776329	nmftype2
GSM776328	nmftype2
GSM776327	nmftype2
GSM776325	nmftype2
GSM776324	nmftype2
GSM776322	nmftype2
GSM776319	nmftype2
GSM776318	nmftype2
GSM776317	nmftype2
GSM776316	nmftype2
GSM776315	nmftype2
GSM776314	nmftype2
GSM776312	nmftype2
GSM776310	nmftype2
GSM776012	nmftype2
GSM776309	nmftype2
GSM776307	nmftype2
GSM776306	nmftype2
GSM776305	nmftype2
GSM776303	nmftype2
GSM776302	nmftype2
GSM776301	nmftype2
GSM776300	nmftype2
GSM776299	nmftype2
GSM776295	nmftype2
GSM776294	nmftype2
GSM776293	nmftype2
GSM776291	nmftype2
GSM776289	nmftype2
GSM776286	nmftype2
GSM776284	nmftype2
GSM776281	nmftype2
GSM776280	nmftype2
GSM776277	nmftype2
GSM776273	nmftype2
GSM776272	nmftype2
GSM776271	nmftype2
GSM776270	nmftype2
GSM776269	nmftype2
GSM776268	nmftype2
GSM776266	nmftype2
GSM776265	nmftype2
GSM776264	nmftype2
GSM776263	nmftype2
GSM776261	nmftype2
GSM776258	nmftype2
GSM776257	nmftype2
GSM776256	nmftype2
GSM776255	nmftype2
GSM776252	nmftype2
GSM776247	nmftype2
GSM776246	nmftype2
GSM776245	nmftype2
GSM776005	nmftype2
GSM776244	nmftype2
GSM776243	nmftype2
GSM776241	nmftype2
GSM776240	nmftype2
GSM776239	nmftype2
GSM776238	nmftype2
GSM776237	nmftype2
GSM776236	nmftype2
GSM776235	nmftype2
GSM776234	nmftype2
GSM776233	nmftype2
GSM776232	nmftype2
GSM776230	nmftype2
GSM776229	nmftype2
GSM776228	nmftype2
GSM776227	nmftype2
GSM776225	nmftype2
GSM776224	nmftype2
GSM776221	nmftype2
GSM776220	nmftype2
GSM776219	nmftype2
GSM776215	nmftype2
GSM776002	nmftype2
GSM776214	nmftype2
GSM776213	nmftype2
GSM776211	nmftype2
GSM776210	nmftype2
GSM776206	nmftype2
GSM776204	nmftype2
GSM776000	nmftype2
GSM776200	nmftype2
GSM776199	nmftype2
GSM776197	nmftype2
GSM776194	nmftype2
GSM775999	nmftype2
GSM776192	nmftype2
GSM776190	nmftype2
GSM776187	nmftype2
GSM775980	nmftype2
GSM776184	nmftype2
GSM776183	nmftype2
GSM776182	nmftype2
GSM776180	nmftype2
GSM776179	nmftype2
GSM776177	nmftype2
GSM776176	nmftype2
GSM775997	nmftype2
GSM776174	nmftype2
GSM776173	nmftype2
GSM776171	nmftype2
GSM776169	nmftype2
GSM776164	nmftype2
GSM776163	nmftype2
GSM776160	nmftype2
GSM776158	nmftype2
GSM775995	nmftype2
GSM776152	nmftype2
GSM776151	nmftype2
GSM776148	nmftype2
GSM776145	nmftype2
GSM776144	nmftype2
GSM776143	nmftype2
GSM776142	nmftype2
GSM776140	nmftype2
GSM776134	nmftype2
GSM776133	nmftype2
GSM776132	nmftype2
GSM776129	nmftype2
GSM776127	nmftype2
GSM776126	nmftype2
GSM776122	nmftype2
GSM776117	nmftype2
GSM776115	nmftype2
GSM776114	nmftype2
GSM776111	nmftype2
GSM776110	nmftype2
GSM776109	nmftype2
GSM776107	nmftype2
GSM776106	nmftype2
GSM776105	nmftype2
GSM776104	nmftype2
GSM776103	nmftype2
GSM775990	nmftype2
GSM776101	nmftype2
GSM776095	nmftype2
GSM776093	nmftype2
GSM776088	nmftype2
GSM776086	nmftype2
GSM776085	nmftype2
GSM775979	nmftype2
GSM776082	nmftype2
GSM776351	nmftype2
GSM776149	nmftype2
GSM776288	nmftype2
GSM775985	nmftype2
GSM776061	nmftype2
GSM776051	nmftype2
GSM776471	nmftype2
GSM776440	nmftype2
GSM776355	nmftype2
GSM776004	nmftype2
GSM776216	nmftype2
GSM776167	nmftype2
GSM776131	nmftype2
GSM776119	nmftype2
GSM776089	nmftype2
GSM776098	nmftype2
GSM776156	nmftype2
GSM776290	nmftype2
GSM776259	nmftype2
GSM776049	nmftype2
GSM776475	nmftype2
GSM776363	nmftype2
GSM776308	nmftype2
GSM776217	nmftype2
GSM775994	nmftype2
GSM776102	nmftype2
GSM776120	nmftype2

## Sheet: Table S5
Supplementary Table-S5: Two DLBCL subtypes specific metabolic pathways were analyzed by GSEA
	ID	Description	setSize	enrichmentScore	NES	pvalue	p.adjust	qvalues	rank	leading_edge	core_enrichment
KEGG_METABOLISM_OF_XENOBIOTICS_BY_CYTOCHROME_P450	KEGG_METABOLISM_OF_XENOBIOTICS_BY_CYTOCHROME_P450	KEGG_METABOLISM_OF_XENOBIOTICS_BY_CYTOCHROME_P450	55	-0.523425	-1.94027	0.00178253	0.0139013	0.00912595	1666	tags=25%, list=8%, signal=23%	GSTO1/MGST2/GSTA4/MGST1/AKR1C1/MGST3/GSTT2/AKR1C2/ADH1B/ALDH1A3/GSTM3/CYP1B1/AKR1C3
KEGG_ARACHIDONIC_ACID_METABOLISM	KEGG_ARACHIDONIC_ACID_METABOLISM	KEGG_ARACHIDONIC_ACID_METABOLISM	51	-0.516421	-1.86625	0.00182815	0.0139013	0.00912595	2975	tags=37%, list=15%, signal=32%	GPX4/PTGES/TBXAS1/EPHX2/GPX1/PTGDS/LTC4S/CBR1/PTGS1/ALOX5/CBR3/PLA2G2A/GPX3/GGT5/PLA2G4A/PTGS2/PTGIS/AKR1C3
KEGG_PYRIMIDINE_METABOLISM	KEGG_PYRIMIDINE_METABOLISM	KEGG_PYRIMIDINE_METABOLISM	91	0.40742	1.77605	0.00238663	0.0139556	0.00916156	4865	tags=45%, list=24%, signal=34%	POLD2/POLE/POLD1/POLR3G/CTPS1/CAD/POLE2/NT5C/TK1/POLE3/POLR3H/POLR2A/POLR1A/NME1/POLA2/POLR2E/PNP/CTPS2/POLR1C/NT5C1A/RRM2/POLR1E/TYMS/DHODH/POLD3/DTYMK/POLR3A/POLR3K/POLA1/POLR2F/UCKL1/UPP2/POLR2H/UMPS/POLR2D/POLR3D/RRM1/POLE4/ENTPD4/POLR1B/PNPT1
KEGG_DRUG_METABOLISM_CYTOCHROME_P450	KEGG_DRUG_METABOLISM_CYTOCHROME_P450	KEGG_DRUG_METABOLISM_CYTOCHROME_P450	57	-0.464493	-1.72679	0.00356506	0.0179217	0.0117652	1989	tags=28%, list=10%, signal=25%	MAOB/GSTT1/GSTO1/MGST2/GSTA4/MGST1/MAOA/MGST3/GSTT2/FMO1/FMO3/ADH1B/AOX1/ALDH1A3/GSTM3
KEGG_NICOTINATE_AND_NICOTINAMIDE_METABOLISM	KEGG_NICOTINATE_AND_NICOTINAMIDE_METABOLISM	KEGG_NICOTINATE_AND_NICOTINAMIDE_METABOLISM	23	-0.582673	-1.79626	0.00396825	0.0184524	0.0121136	505	tags=48%, list=3%, signal=47%	NMNAT3/NAMPT/CD38/NMRK1/AOX1/BST1/ENPP1/NUDT12/NT5E/NNMT
KEGG_TRYPTOPHAN_METABOLISM	KEGG_TRYPTOPHAN_METABOLISM	KEGG_TRYPTOPHAN_METABOLISM	40	-0.498181	-1.74177	0.00754717	0.031195	0.0204789	1724	tags=28%, list=9%, signal=25%	MAOA/KYNU/ALDH7A1/KMO/INMT/IDO1/ALDH2/AOX1/CYP1B1/TDO2

## Sheet: Table S6
Supplementary Table-S6: The result of differential expression analysis of the two subtypes
GENE	logFC	AveExpr	t	P.Value	adj.P.Val	B	g
WWTR1	-1.61505	8.63405	-24.4113	3.84723e-97	7.76602e-93	210.755	DOWN
PLS3	-1.55514	9.97942	-24.2244	4.86381e-96	4.90905e-92	208.233	DOWN
CALD1	-1.36144	11.4557	-23.898	4.05996e-94	2.73181e-90	203.835	DOWN
NNMT	-1.72921	10.8085	-23.5529	4.32993e-92	2.1851e-88	199.193	DOWN
GUCY1B1	-1.32366	8.95153	-23.4438	1.89366e-91	7.64508e-88	197.726	DOWN
PPIC	-1.50389	9.05464	-23.3554	6.24901e-91	2.10238e-87	196.54	DOWN
2020-09-10	-1.31705	9.27324	-23.3033	1.26254e-90	3.64081e-87	195.841	DOWN
ITGAV	-1.3308	11.0888	-23.1556	9.25359e-90	2.33491e-86	193.86	DOWN
FRMD6	-1.88756	8.31132	-23.0375	4.54631e-89	1.01969e-85	192.278	DOWN
GNG12	-1.1103	8.68304	-22.8654	4.61603e-88	9.31791e-85	189.974	DOWN
TMEM47	-1.5087	8.24102	-22.7	4.26729e-87	7.83086e-84	187.763	DOWN
SELENOM	-1.52657	8.9292	-22.2981	9.37442e-85	1.45563e-81	182.402	DOWN
CDH11	-1.64333	9.50063	-22.1243	9.59956e-84	1.38412e-80	180.09	DOWN
HNMT	-1.27527	10.9382	-21.7356	1.72167e-81	2.31691e-78	174.931	DOWN
FERMT2	-1.34282	9.01947	-21.2832	7.03733e-79	8.87847e-76	168.953	DOWN
CNRIP1	-1.41881	7.49858	-21.0678	1.21961e-77	1.29923e-74	166.118	DOWN
FBN1	-1.69354	10.0335	-21.0676	1.2229e-77	1.29923e-74	166.115	DOWN
TPM1	-1.39912	10.4841	-20.9666	4.65037e-77	4.64308e-74	164.787	DOWN
GUCY1A1	-1.44753	8.56458	-20.8676	1.71795e-76	1.5763e-73	163.488	DOWN
GPX8	-1.60564	7.44107	-20.8503	2.15952e-76	1.89531e-73	163.261	DOWN
LXN	-1.29912	9.56741	-20.8288	2.86536e-76	2.41001e-73	162.98	DOWN
ARMCX1	-1.06352	8.33675	-20.7802	5.44274e-76	4.39468e-73	162.342	DOWN
PDGFC	-1.56101	8.73897	-20.7752	5.81061e-76	4.51127e-73	162.277	DOWN
RIN2	-1.41515	9.48814	-20.7387	9.40582e-76	7.03207e-73	161.798	DOWN
SH3D19	-1.61758	6.65314	-20.6591	2.68205e-75	1.93357e-72	160.756	DOWN
TJP1	-1.18721	8.81347	-20.5913	6.54316e-75	4.55449e-72	159.87	DOWN
CAV2	-1.54595	8.13379	-20.3916	9.00473e-74	6.05898e-71	157.263	DOWN
PROS1	-1.16738	7.66973	-20.128	2.83691e-72	1.78956e-69	153.834	DOWN
SRM	1.07926	9.78441	20.0747	5.69102e-72	3.48118e-69	153.142	UP
SNAI2	-1.4767	8.48786	-20.0469	8.18021e-72	4.85664e-69	152.781	DOWN
CLMP	-1.47211	7.58809	-19.9968	1.57319e-71	9.07328e-69	152.131	DOWN
ANXA1	-1.36556	10.7407	-19.9344	3.54811e-71	1.9895e-68	151.323	DOWN
SDC2	-1.39672	8.36862	-19.8157	1.6641e-70	9.07881e-68	149.786	DOWN
CACNA2D1	-1.53559	6.4945	-19.5874	3.2238e-69	1.59659e-66	146.84	DOWN
LPAR6	-1.29137	8.76164	-19.5869	3.24286e-69	1.59659e-66	146.834	DOWN
MYLK	-1.28385	10.0433	-19.476	1.36284e-68	6.55005e-66	145.407	DOWN
AKR1C3	-2.02054	6.14325	-19.457	1.74347e-68	8.1846e-66	145.162	DOWN
FSTL1	-1.28164	10.7077	-19.436	2.28673e-68	1.02578e-65	144.893	DOWN
C11orf74	-1.05548	6.63394	-19.4124	3.10348e-68	1.34795e-65	144.589	DOWN
PDGFRA	-1.84744	9.18247	-19.4115	3.13849e-68	1.34795e-65	144.578	DOWN
TM4SF1	-1.33302	9.32428	-19.3919	4.04089e-68	1.69936e-65	144.327	DOWN
PMP22	-1.31734	9.52728	-19.3681	5.49665e-68	2.26439e-65	144.021	DOWN
MCM3	1.00649	10.7536	19.364	5.79661e-68	2.34021e-65	143.968	UP
CFH	-1.34443	8.05215	-19.3259	9.48001e-68	3.75222e-65	143.479	DOWN
LUM	-1.75732	12.1006	-19.2808	1.69471e-67	6.57872e-65	142.902	DOWN
ADGRL4	-1.29605	8.18754	-19.269	1.97323e-67	7.51541e-65	142.751	DOWN
PALLD	-1.14432	10.7332	-19.2644	2.09525e-67	7.83234e-65	142.691	DOWN
JAG1	-1.20004	9.26901	-19.2312	3.21477e-67	1.17988e-64	142.265	DOWN
OSBPL1A	-1.02069	8.14281	-19.2272	3.38212e-67	1.21913e-64	142.215	DOWN
BTBD3	-1.12633	7.19699	-19.0927	1.90839e-66	6.75837e-64	140.495	DOWN
MSRB3	-1.68846	7.64748	-19.0711	2.51885e-66	8.76648e-64	140.219	DOWN
PRRX1	-1.30253	9.7615	-19.0229	4.67994e-66	1.57449e-63	139.604	DOWN
SPARCL1	-1.21279	11.3441	-18.9684	9.41837e-66	3.06644e-63	138.908	DOWN
ARRDC4	-1.18941	8.56468	-18.9409	1.33975e-65	4.29274e-63	138.558	DOWN
LAMB1	-1.4794	9.02453	-18.9299	1.54226e-65	4.82897e-63	138.418	DOWN
CPE	-1.44599	8.65304	-18.9261	1.61889e-65	4.95134e-63	138.37	DOWN
PROCR	-1.18818	7.31133	-18.9001	2.25802e-65	6.70301e-63	138.039	DOWN
CYBRD1	-1.16245	9.62855	-18.8501	4.28433e-65	1.25338e-62	137.403	DOWN
GJA1	-1.46747	10.447	-18.7978	8.36311e-65	2.41168e-62	136.738	DOWN
TDO2	-1.78545	8.34292	-18.6863	3.47444e-64	9.87817e-62	135.322	DOWN
BICC1	-1.65089	6.65109	-18.583	1.29469e-63	3.53171e-61	134.015	DOWN
RSPO3	-1.2671	7.49478	-18.5748	1.43731e-63	3.86846e-61	133.911	DOWN
GXYLT2	-1.5225	6.7858	-18.5678	1.57089e-63	4.17237e-61	133.823	DOWN
TPBG	-1.12716	7.95948	-18.5627	1.67635e-63	4.39465e-61	133.758	DOWN
PLSCR4	-1.30013	7.34766	-18.5443	2.12014e-63	5.48682e-61	133.525	DOWN
ADAM9	-1.05457	10.1452	-18.5296	2.55447e-63	6.52715e-61	133.34	DOWN
SLC2A10	-1.66857	5.70804	-18.3903	1.49845e-62	3.6443e-60	131.581	DOWN
SPART	-1.16552	8.57335	-18.3608	2.17695e-62	5.23141e-60	131.21	DOWN
FAM198B	-1.3844	9.99918	-18.3291	3.25414e-62	7.728e-60	130.811	DOWN
GSTM3	-1.31047	7.16397	-18.3224	3.54175e-62	8.31322e-60	130.726	DOWN
WLS	-1.41451	7.38723	-18.2549	8.32627e-62	1.90993e-59	129.877	DOWN
GAS1	-1.66263	9.19959	-18.0123	1.77573e-60	3.93899e-58	126.836	DOWN
ZCCHC24	-1.0412	7.8632	-18.0079	1.87633e-60	4.11692e-58	126.781	DOWN
CRY1	-1.24983	8.54119	-17.9763	2.79145e-60	5.99449e-58	126.386	DOWN
CAVIN3	-1.00269	7.48263	-17.9416	4.31941e-60	9.17807e-58	125.952	DOWN
HMGA1	1.03028	11.2661	17.9328	4.82506e-60	9.93864e-58	125.842	UP
EPAS1	-1.098	10.6586	-17.8963	7.62717e-60	1.55517e-57	125.387	DOWN
EFEMP1	-1.4702	9.86563	-17.8684	1.08344e-59	2.18704e-57	125.039	DOWN
IL1R1	-1.16663	9.69374	-17.8636	1.15038e-59	2.29916e-57	124.979	DOWN
NCKAP1	-1.1271	8.8487	-17.8485	1.39024e-59	2.72461e-57	124.791	DOWN
EMP1	-1.59454	9.06996	-17.7779	3.36485e-59	6.46884e-57	123.912	DOWN
ITM2B	-1.08076	12.8984	-17.7714	3.65253e-59	6.95566e-57	123.831	DOWN
GNAI1	-1.33128	6.35329	-17.703	8.59009e-59	1.60555e-56	122.981	DOWN
ECM2	-1.71363	6.90842	-17.7007	8.83778e-59	1.63669e-56	122.953	DOWN
YAP1	-1.13901	8.87548	-17.6918	9.87715e-59	1.81255e-56	122.842	DOWN
CSGALNACT1	-1.41656	7.63636	-17.6477	1.7125e-58	3.11428e-56	122.295	DOWN
ANKRD50	-1.12029	7.04339	-17.6164	2.53077e-58	4.52089e-56	121.907	DOWN
DPYD	-1.13737	10.6241	-17.5935	3.36777e-58	5.91145e-56	121.623	DOWN
LOX	-1.94464	7.0782	-17.5786	4.055e-58	7.05639e-56	121.439	DOWN
LAMA4	-1.26523	8.49138	-17.5614	5.02841e-58	8.67551e-56	121.225	DOWN
NT5E	-1.2232	6.9507	-17.5333	7.12839e-58	1.20919e-55	120.878	DOWN
KDELR3	-1.33044	7.51869	-17.4856	1.29135e-57	2.15432e-55	120.288	DOWN
ANGPTL1	-2.10944	5.01761	-17.4563	1.85809e-57	3.04939e-55	119.926	DOWN
RRP9	1.23141	6.76062	17.43	2.57742e-57	4.16223e-55	119.601	UP
COX7A1	-1.21419	7.04319	-17.4156	3.08061e-57	4.93533e-55	119.424	DOWN
SNX7	-1.46098	7.21363	-17.4013	3.67689e-57	5.84422e-55	119.248	DOWN
OLFML1	-1.05386	6.69221	-17.3803	4.77161e-57	7.52498e-55	118.989	DOWN
UBL3	-1.0202	9.96481	-17.3583	6.26726e-57	9.65732e-55	118.718	DOWN
HEPH	-1.19523	6.6752	-17.3038	1.23176e-56	1.81491e-54	118.047	DOWN
LIG1	1.04778	8.42482	17.2972	1.33728e-56	1.94204e-54	117.965	UP
RND3	-1.1846	9.0718	-17.286	1.53546e-56	2.21391e-54	117.828	DOWN
COL3A1	-1.80905	13.0531	-17.2539	2.28294e-56	3.24531e-54	117.434	DOWN
TFPI	-1.23326	8.8373	-17.2439	2.58409e-56	3.62239e-54	117.311	DOWN
GULP1	-1.71041	5.83707	-17.2164	3.63133e-56	5.05531e-54	116.973	DOWN
CDCA8	1.00282	8.80128	17.187	5.21771e-56	7.21402e-54	116.612	UP
DCN	-1.99312	10.9975	-17.1856	5.30765e-56	7.28845e-54	116.595	DOWN
PTPN14	-1.5643	5.97908	-17.1698	6.45657e-56	8.80624e-54	116.401	DOWN
ENAH	-1.32537	8.20203	-17.1503	8.21286e-56	1.10523e-53	116.162	DOWN
CNN3	-1.17691	9.26421	-17.1372	9.65215e-56	1.29032e-53	116.001	DOWN
TUSC1	-1.1	7.94393	-17.126	1.10748e-55	1.46115e-53	115.865	DOWN
LPAR1	-1.18288	8.68184	-16.9455	1.01948e-54	1.29429e-52	113.659	DOWN
TNFSF13B	-1.24496	11.1606	-16.9056	1.66402e-54	2.09936e-52	113.172	DOWN
OTULINL	-1.04269	7.3321	-16.8921	1.9627e-54	2.46081e-52	113.008	DOWN
IL15	-1.16074	8.70075	-16.8497	3.29741e-54	4.05863e-52	112.493	DOWN
PRSS23	-1.16578	8.58293	-16.7907	6.78592e-54	8.30185e-52	111.776	DOWN
ANTXR1	-1.55185	9.31631	-16.7507	1.10586e-53	1.34475e-51	111.291	DOWN
CLIC2	-1.0693	9.50601	-16.7411	1.24459e-53	1.50439e-51	111.173	DOWN
ZNF503	-1.41061	7.41563	-16.7192	1.62592e-53	1.94206e-51	110.908	DOWN
DKK3	-1.58576	7.92809	-16.6517	3.69836e-53	4.31532e-51	110.091	DOWN
SMOC2	-1.53854	6.98455	-16.6463	3.95266e-53	4.58554e-51	110.025	DOWN
GEM	-1.12558	8.98318	-16.6437	4.07645e-53	4.67541e-51	109.994	DOWN
PPM1G	1.05545	9.278	16.6321	4.69745e-53	5.35722e-51	109.854	UP
RECQL4	1.01594	8.0291	16.6276	4.96043e-53	5.56285e-51	109.799	UP
PDLIM3	-1.59143	7.38451	-16.6005	6.89283e-53	7.64498e-51	109.473	DOWN
SGMS2	-1.41827	6.60365	-16.5614	1.10866e-52	1.20319e-50	109.001	DOWN
HTRA1	-1.27977	8.80026	-16.5567	1.1747e-52	1.26805e-50	108.943	DOWN
ROBO1	-1.32252	9.57078	-16.5398	1.44243e-52	1.54877e-50	108.739	DOWN
MGP	-1.7342	9.65451	-16.5387	1.46038e-52	1.55974e-50	108.727	DOWN
EMCN	-1.25206	7.28697	-16.5294	1.6349e-52	1.71886e-50	108.615	DOWN
DSEL	-1.68167	4.69988	-16.4895	2.65288e-52	2.76036e-50	108.134	DOWN
PCSK5	-1.93818	5.28648	-16.4526	4.14882e-52	4.20844e-50	107.689	DOWN
TIMP2	-1.09731	10.7045	-16.4093	7.01088e-52	7.00602e-50	107.168	DOWN
WISP1	-1.41601	7.55881	-16.3924	8.59291e-52	8.54465e-50	106.966	DOWN
POLQ	1.03071	8.82003	16.3772	1.03317e-51	1.02233e-49	106.783	UP
EDNRA	-1.17155	7.76539	-16.304	2.50047e-51	2.41505e-49	105.905	DOWN
TGFBI	-1.36777	10.6718	-16.2914	2.9086e-51	2.78261e-49	105.755	DOWN
PARVA	-1.06006	6.54238	-16.2776	3.43604e-51	3.2717e-49	105.589	DOWN
FZD7	-1.08197	7.1726	-16.2382	5.51948e-51	5.2308e-49	105.119	DOWN
DNM3OS	-1.47115	6.13792	-16.2206	6.82623e-51	6.40904e-49	104.907	DOWN
CALCRL	-1.15456	6.37484	-16.1593	1.42536e-50	1.32591e-48	104.176	DOWN
TROAP	1.05246	7.92252	16.111	2.54546e-50	2.33558e-48	103.6	UP
KLF9	-1.19666	8.08299	-16.0716	4.0823e-50	3.64625e-48	103.131	DOWN
TSPAN2	-1.25236	6.48978	-16.0601	4.68435e-50	4.14729e-48	102.994	DOWN
VGLL3	-1.56483	7.55166	-16.0581	4.79517e-50	4.22687e-48	102.971	DOWN
ITGA1	-1.2648	5.33776	-16.0295	6.7529e-50	5.90104e-48	102.631	DOWN
NUAK1	-1.03634	7.12448	-15.9915	1.06386e-49	9.17737e-48	102.18	DOWN
LAPTM4B	-1.11101	9.47955	-15.9748	1.29923e-49	1.11601e-47	101.981	DOWN
GPC6	-2.19973	6.46043	-15.9736	1.31778e-49	1.12715e-47	101.967	DOWN
PRTFDC1	-1.05175	7.01036	-15.9614	1.52487e-49	1.28254e-47	101.822	DOWN
DOCK4	-1.05753	8.96039	-15.8895	3.59111e-49	2.9709e-47	100.971	DOWN
CTSK	-1.53943	10.3061	-15.8636	4.89189e-49	3.99788e-47	100.664	DOWN
CHN1	-1.10288	8.74597	-15.8548	5.43273e-49	4.42198e-47	100.56	DOWN
PLXDC2	-1.38886	8.00769	-15.8496	5.77771e-49	4.68389e-47	100.499	DOWN
CD37	1.18131	10.6306	15.84	6.47338e-49	5.20604e-47	100.386	UP
TLR3	-1.12452	5.37268	-15.8352	6.85275e-49	5.48927e-47	100.329	DOWN
ZNF521	-1.35884	5.93395	-15.834	6.95862e-49	5.55205e-47	100.314	DOWN
MSC-AS1	-1.17323	6.39282	-15.7774	1.36271e-48	1.07034e-46	99.6467	DOWN
ANOS1	-1.15117	7.32324	-15.76	1.67517e-48	1.2956e-46	99.4416	DOWN
POU2F2	1.23233	10.1764	15.7378	2.17944e-48	1.67278e-46	99.1803	UP
FBLN1	-1.87389	6.66103	-15.7317	2.34313e-48	1.77814e-46	99.1083	DOWN
EVA1C	-1.16292	5.79705	-15.711	2.99315e-48	2.25447e-46	98.8652	DOWN
SPRY2	-1.15717	7.13419	-15.6743	4.62351e-48	3.44392e-46	98.4333	DOWN
CSRP2	-1.07598	9.06195	-15.6332	7.51485e-48	5.5363e-46	97.9509	DOWN
KITLG	-1.26542	6.9806	-15.6253	8.25279e-48	6.05785e-46	97.8579	DOWN
COL12A1	-1.92451	8.80494	-15.5936	1.19943e-47	8.67805e-46	97.4866	DOWN
CLEC2B	-1.23681	10.8766	-15.5794	1.41803e-47	1.01866e-45	97.3203	DOWN
KLF4	-1.32745	8.51955	-15.5703	1.5787e-47	1.12607e-45	97.2137	DOWN
COL14A1	-1.60674	6.83121	-15.5434	2.16875e-47	1.52009e-45	96.8984	DOWN
PTGFRN	-1.40161	6.88223	-15.5358	2.37161e-47	1.65652e-45	96.8096	DOWN
CLEC4A	-1.07636	8.93002	-15.4901	4.06257e-47	2.81811e-45	96.275	DOWN
TWIST1	-1.22438	7.10487	-15.4817	4.48402e-47	3.09981e-45	96.177	DOWN
FGF7	-1.33973	6.01719	-15.4707	5.10395e-47	3.50436e-45	96.0484	DOWN
PCOLCE	-1.36366	8.32279	-15.4651	5.44746e-47	3.72754e-45	95.9837	DOWN
ARL4A	-1.15708	8.03593	-15.4457	6.84312e-47	4.58921e-45	95.7572	DOWN
RERG	-1.24123	6.29129	-15.4398	7.33801e-47	4.85656e-45	95.6879	DOWN
B3GNT5	-1.34021	6.87421	-15.4242	8.80825e-47	5.81057e-45	95.5065	DOWN
ID4	-1.41823	7.15193	-15.4165	9.63999e-47	6.33853e-45	95.4169	DOWN
CTHRC1	-1.7231	10.3906	-15.3949	1.24297e-46	8.08628e-45	95.1645	DOWN
COL8A1	-2.46957	6.25902	-15.3837	1.41584e-46	9.1603e-45	95.0352	DOWN
CRIM1	-1.04663	8.45806	-15.3818	1.44827e-46	9.34018e-45	95.0127	DOWN
EMP2	-1.1897	7.29643	-15.3706	1.65248e-46	1.06232e-44	94.8817	DOWN
CRISPLD1	-1.56095	5.48779	-15.3481	2.14859e-46	1.36818e-44	94.621	DOWN
LIMD2	1.27189	7.40624	15.3367	2.45687e-46	1.55145e-44	94.4879	UP
COL1A2	-1.49674	12.1117	-15.3276	2.73133e-46	1.71759e-44	94.3827	DOWN
LRIG3	-1.24517	5.61038	-15.3069	3.47927e-46	2.17439e-44	94.1424	DOWN
PRKG1	-1.06927	6.32377	-15.275	5.05154e-46	3.11836e-44	93.7721	DOWN
CCDC102B	-1.32424	6.96502	-15.2523	6.58476e-46	4.02788e-44	93.5089	DOWN
PTPN13	-1.18699	6.74837	-15.2498	6.77972e-46	4.12673e-44	93.4799	DOWN
PTGIS	-1.96476	6.67826	-15.2418	7.44324e-46	4.48505e-44	93.3872	DOWN
DUSP6	-1.01546	10.313	-15.2331	8.23901e-46	4.94978e-44	93.2863	DOWN
PDE1A	-1.4518	4.83144	-15.214	1.02993e-45	6.15095e-44	93.0647	DOWN
MAF	-1.09934	9.55385	-15.1837	1.46547e-45	8.72625e-44	92.7145	DOWN
CXCL12	-1.35931	10.633	-15.1781	1.56339e-45	9.25471e-44	92.6503	DOWN
NR2F2	-1.09534	9.4884	-15.169	1.73804e-45	1.02286e-43	92.5451	DOWN
KDELC1	-1.13803	6.6216	-15.1684	1.75166e-45	1.02788e-43	92.5374	DOWN
TGFB1I1	-1.06622	7.50573	-15.1494	2.18392e-45	1.27412e-43	92.3184	DOWN
GNG11	-1.48721	9.69089	-15.1258	2.87475e-45	1.65327e-43	92.0455	DOWN
PDZRN3	-1.57573	6.43181	-15.122	3.00431e-45	1.72287e-43	92.0017	DOWN
THBS1	-1.68034	8.58143	-15.0715	5.39455e-45	3.02484e-43	91.4205	DOWN
LIN7A	-1.04123	6.30651	-15.0584	6.28284e-45	3.49381e-43	91.2691	DOWN
CYP1B1	-1.4291	10.0492	-15.0155	1.03276e-44	5.64967e-43	90.7757	DOWN
GLT8D2	-1.56989	6.72419	-15.0068	1.14189e-44	6.21297e-43	90.6759	DOWN
NOX4	-1.64884	5.6868	-15.0058	1.15488e-44	6.26677e-43	90.6647	DOWN
SEMA3C	-1.92427	6.97518	-14.9779	1.59605e-44	8.54584e-43	90.3435	DOWN
EDIL3	-1.80924	6.33779	-14.948	2.2523e-44	1.18707e-42	90.0015	DOWN
GIMAP6	-1.23526	10.153	-14.9064	3.64197e-44	1.90953e-42	89.5244	DOWN
NHS	-1.24921	5.94229	-14.889	4.45192e-44	2.32213e-42	89.325	DOWN
PLA2G4A	-1.11295	6.61589	-14.8842	4.70339e-44	2.44069e-42	89.2704	DOWN
LINC01094	-1.37177	7.42723	-14.8763	5.15271e-44	2.66017e-42	89.1799	DOWN
LRP12	-1.33406	5.5602	-14.8703	5.52128e-44	2.84318e-42	89.1113	DOWN
NRP1	-1.14194	7.89504	-14.8669	5.73897e-44	2.94776e-42	89.0729	DOWN
TCIM	-1.35101	7.54902	-14.8431	7.54765e-44	3.83771e-42	88.8009	DOWN
ASPN	-2.08571	6.98775	-14.8379	8.01825e-44	4.06675e-42	88.7408	DOWN
SFRP4	-2.26423	6.93121	-14.8116	1.08498e-43	5.44811e-42	88.4406	DOWN
PLAC9	-1.55541	5.19453	-14.7895	1.39846e-43	7.0048e-42	88.1886	DOWN
SLFN5	-1.2002	9.71209	-14.7855	1.46304e-43	7.29209e-42	88.1438	DOWN
SNAPC4	1.02398	7.78225	14.7782	1.59129e-43	7.90857e-42	88.0604	UP
F2R	-1.10124	9.01671	-14.7763	1.62644e-43	8.0272e-42	88.0387	DOWN
FOXM1	1.00394	8.05952	14.7733	1.68428e-43	8.29239e-42	88.004	UP
PLK2	-1.1813	7.29335	-14.7699	1.75108e-43	8.60034e-42	87.9654	DOWN
LDB2	-1.15043	6.84172	-14.7114	3.42251e-43	1.65676e-41	87.3001	DOWN
MICAL2	-1.1923	8.72093	-14.69	4.37084e-43	2.09572e-41	87.0573	DOWN
CFI	-1.11631	7.25148	-14.6868	4.5335e-43	2.16856e-41	87.021	DOWN
PTPRK	-1.06169	7.91527	-14.6614	6.06249e-43	2.89308e-41	86.7325	DOWN
PIR	-1.17756	6.52528	-14.6382	7.90671e-43	3.75541e-41	86.4688	DOWN
FAM13C	-1.22248	5.87679	-14.6191	9.82551e-43	4.63406e-41	86.2532	DOWN
TCF7L2	-1.00265	9.24298	-14.6063	1.13746e-42	5.32731e-41	86.1078	DOWN
RARRES2	-1.3218	9.92088	-14.6052	1.15249e-42	5.38521e-41	86.0948	DOWN
DDX11	1.02071	8.45057	14.5766	1.59496e-42	7.38435e-41	85.7722	UP
SFRP2	-2.52013	6.62254	-14.5759	1.60821e-42	7.42868e-41	85.764	DOWN
OLFML3	-1.24764	7.26671	-14.5522	2.1078e-42	9.69203e-41	85.4955	DOWN
TENT5A	-1.01586	8.47326	-14.5194	3.05962e-42	1.39732e-40	85.1256	DOWN
PLOD2	-1.52007	8.51815	-14.5085	3.46509e-42	1.57537e-40	85.002	DOWN
PTPRB	-1.00457	6.68665	-14.508	3.48415e-42	1.58047e-40	84.9966	DOWN
UBXN4	-1.56166	10.9041	-14.4949	4.03976e-42	1.82431e-40	84.8497	DOWN
NID2	-1.2783	7.48932	-14.4597	6.02987e-42	2.70487e-40	84.4521	DOWN
ADAMTS5	-1.44128	6.65592	-14.4235	9.0798e-42	4.00185e-40	84.0458	DOWN
PMEPA1	-1.42399	7.54706	-14.4047	1.12324e-41	4.89715e-40	83.8347	DOWN
HDGFL3	-1.05802	8.78298	-14.3965	1.23351e-41	5.34329e-40	83.7417	DOWN
AEN	1.26059	8.23497	14.3942	1.26526e-41	5.46908e-40	83.7165	UP
PDGFRL	-1.79855	4.80811	-14.3742	1.58739e-41	6.80319e-40	83.4914	DOWN
NUDT12	-1.03311	5.94065	-14.3694	1.67481e-41	7.13244e-40	83.4381	DOWN
MYBL2	1.07455	9.72977	14.3583	1.89997e-41	8.0573e-40	83.3129	UP
COPZ2	-1.06882	6.60564	-14.3531	2.01463e-41	8.52562e-40	83.2548	DOWN
INHBA	-2.198	7.64555	-14.3502	2.0807e-41	8.78682e-40	83.2227	DOWN
CARD11	1.13626	8.52114	14.296	3.83461e-41	1.57649e-39	82.6159	UP
CHSY3	-1.38983	4.70485	-14.2893	4.13639e-41	1.69365e-39	82.5408	DOWN
HSPB2	-1.27122	4.79337	-14.2874	4.22675e-41	1.72715e-39	82.5193	DOWN
MCC	-1.11004	7.51582	-14.2731	4.96434e-41	2.01225e-39	82.3597	DOWN
MYCT1	-1.07878	6.40304	-14.2703	5.12224e-41	2.0721e-39	82.3286	DOWN
COL6A3	-1.23653	11.7756	-14.2463	6.71538e-41	2.69496e-39	82.0598	DOWN
FHL1	-1.23125	9.62609	-14.2433	6.94282e-41	2.78071e-39	82.0267	DOWN
PLN	-1.78974	5.51501	-14.2393	7.26282e-41	2.89166e-39	81.982	DOWN
FN1	-1.5905	12.4485	-14.2223	8.79258e-41	3.48697e-39	81.7923	DOWN
NEXN	-1.49318	7.2271	-14.2198	9.04206e-41	3.57888e-39	81.7645	DOWN
CLIP4	-1.01859	9.00459	-14.2008	1.11967e-40	4.40578e-39	81.5524	DOWN
IL18	-1.07895	10.3626	-14.1719	1.54766e-40	6.01948e-39	81.2311	DOWN
DCLK1	-1.11448	7.49354	-14.1614	1.74215e-40	6.76291e-39	81.1137	DOWN
TNFRSF12A	-1.18631	6.27824	-14.1485	2.01272e-40	7.79824e-39	80.9704	DOWN
RTN1	-1.11734	8.31943	-14.0907	3.84467e-40	1.47265e-38	80.3281	DOWN
RHOBTB1	-1.14448	6.1869	-14.0785	4.40377e-40	1.67725e-38	80.1933	DOWN
LCP2	-1.00195	10.3086	-14.0474	6.23053e-40	2.35965e-38	79.849	DOWN
DDX60	-1.03392	9.24814	-14.0211	8.36054e-40	3.15398e-38	79.5571	DOWN
SSPN	-1.05174	8.33241	-14.0133	9.11371e-40	3.41561e-38	79.4715	DOWN
VCAN	-1.58455	9.79537	-13.98	1.32084e-39	4.92837e-38	79.1033	DOWN
CCDC3	-1.40215	6.11167	-13.9569	1.70839e-39	6.27012e-38	78.848	DOWN
TNFAIP6	-1.83616	7.8113	-13.9502	1.84074e-39	6.7192e-38	78.7739	DOWN
MPDZ	-1.19081	6.42155	-13.8993	3.23693e-39	1.16265e-37	78.2138	DOWN
COL5A2	-1.56373	9.97436	-13.8388	6.32855e-39	2.23336e-37	77.5486	DOWN
LINC01279	-1.70643	6.79931	-13.8137	8.35353e-39	2.92751e-37	77.2731	DOWN
CTGF	-1.80512	8.6332	-13.7405	1.87361e-38	6.39944e-37	76.4716	DOWN
DHX38	1.01299	6.95435	13.708	2.68067e-38	9.07919e-37	76.1162	UP
EGFL6	-1.6068	7.052	-13.7	2.92579e-38	9.85975e-37	76.0294	DOWN
SYNPO2	-1.04456	7.662	-13.6856	3.42885e-38	1.14975e-36	75.872	DOWN
ABI3BP	-1.18064	10.8359	-13.6699	4.07158e-38	1.35179e-36	75.7015	DOWN
SNX9	-1.04009	8.71366	-13.6477	5.19756e-38	1.71715e-36	75.4592	DOWN
DEPTOR	-1.11852	7.60408	-13.6375	5.81216e-38	1.90771e-36	75.3484	DOWN
ZFPM2	-1.02555	6.19104	-13.6295	6.34885e-38	2.07375e-36	75.2607	DOWN
TSPAN12	-1.32085	6.4705	-13.5673	1.25455e-37	4.03254e-36	74.585	DOWN
DPYSL3	-1.08791	7.71237	-13.5577	1.39361e-37	4.43715e-36	74.4807	DOWN
FBXO32	-1.2302	6.8862	-13.5559	1.42044e-37	4.51544e-36	74.4618	DOWN
LTBP2	-1.25319	8.17025	-13.5141	2.2416e-37	7.07016e-36	74.0092	DOWN
DIXDC1	-1.10763	6.71664	-13.5082	2.39278e-37	7.51176e-36	73.9445	DOWN
RAPH1	-1.05599	8.69046	-13.4878	2.98787e-37	9.31812e-36	73.7241	DOWN
FIBIN	-1.17698	6.92679	-13.4379	5.14097e-37	1.56761e-35	73.1858	DOWN
LINC01503	-1.09622	4.26879	-13.4329	5.42901e-37	1.65045e-35	73.1317	DOWN
POSTN	-2.31252	10.7941	-13.4085	7.07774e-37	2.12606e-35	72.8686	DOWN
HS3ST3B1	-1.20216	8.79766	-13.3972	8.00584e-37	2.39062e-35	72.7464	DOWN
FNDC1	-1.63108	7.4523	-13.3866	8.97252e-37	2.65961e-35	72.6333	DOWN
MATR3	1.24374	7.7525	13.3861	9.02161e-37	2.67024e-35	72.6279	UP
LRCH2	-1.02553	4.73252	-13.3678	1.10023e-36	3.23279e-35	72.431	DOWN
P3H4	-1.23572	5.5672	-13.3659	1.12335e-36	3.29113e-35	72.4104	DOWN
CHRDL1	-1.39779	7.30302	-13.359	1.21096e-36	3.53754e-35	72.3359	DOWN
TIMP3	-1.30999	10.3547	-13.3555	1.25803e-36	3.66974e-35	72.298	DOWN
SULF1	-1.84917	9.22255	-13.343	1.44008e-36	4.17666e-35	72.164	DOWN
UBA1	1.00774	10.9921	13.3404	1.4815e-36	4.29062e-35	72.1358	UP
EFNA1	-1.12207	6.3718	-13.3372	1.53308e-36	4.43363e-35	72.1019	DOWN
MFAP2	-1.13637	6.76788	-13.3172	1.90376e-36	5.48208e-35	71.8871	DOWN
MXRA5	-1.60311	9.99975	-13.311	2.03504e-36	5.85176e-35	71.8209	DOWN
RORA	-1.07466	8.67371	-13.3019	2.246e-36	6.44918e-35	71.7231	DOWN
TMEM45A	-1.32183	7.52104	-13.299	2.31653e-36	6.64226e-35	71.6924	DOWN
TMEM98	-1.18275	5.69947	-13.298	2.34251e-36	6.70722e-35	71.6814	DOWN
GATA6	-1.19352	6.17607	-13.2778	2.91299e-36	8.25866e-35	71.4652	DOWN
PABPC5	-1.56064	3.19426	-13.2704	3.15756e-36	8.93948e-35	71.3852	DOWN
CCDC80	-1.31792	8.21507	-13.2682	3.23066e-36	9.13364e-35	71.3625	DOWN
EPS8	-1.12595	8.86538	-13.2143	5.77537e-36	1.5992e-34	70.7863	DOWN
ACTA2	-1.01659	10.807	-13.1364	1.33359e-35	3.62802e-34	69.9563	DOWN
LOC100287497	1.32304	5.77864	13.1092	1.78563e-35	4.81238e-34	69.6668	UP
HTR2B	-1.48007	4.91575	-13.1071	1.8256e-35	4.91355e-34	69.6449	DOWN
FAM129C	1.9452	9.87618	13.0914	2.16194e-35	5.8033e-34	69.4771	UP
ADAM12	-1.40384	7.65321	-13.0634	2.91461e-35	7.74135e-34	69.1809	DOWN
ZNF423	-1.01771	5.79909	-13.0536	3.23598e-35	8.56114e-34	69.0771	DOWN
GIMAP2	-1.00516	10.1935	-13.0497	3.37417e-35	8.91506e-34	69.0357	DOWN
THBS2	-1.65906	8.44073	-13.0244	4.42165e-35	1.15317e-33	68.7676	DOWN
TCEAL7	-1.17797	4.81871	-13.0133	4.97856e-35	1.29174e-33	68.6499	DOWN
EDNRB	-1.09965	8.11027	-13.0038	5.5056e-35	1.42482e-33	68.5501	DOWN
ARHGAP28	-1.2886	5.3215	-12.9909	6.32122e-35	1.62963e-33	68.4131	DOWN
PDPN	-1.38176	7.54883	-12.9716	7.75716e-35	1.9821e-33	68.2101	DOWN
NTM	-1.23236	5.98564	-12.9657	8.26129e-35	2.10028e-33	68.1477	DOWN
DYRK2	-1.27655	8.37031	-12.9398	1.08855e-34	2.76049e-33	67.8741	DOWN
SRPX	-1.29604	7.14546	-12.925	1.27294e-34	3.21194e-33	67.719	DOWN
RGS5	-1.09564	9.33307	-12.9177	1.37685e-34	3.46548e-33	67.6411	DOWN
SCAF1	1.12183	5.44923	12.8965	1.72404e-34	4.29647e-33	67.4182	UP
DUSP23	-1.00876	7.64013	-12.8846	1.95471e-34	4.85933e-33	67.2936	DOWN
SPIB	1.12499	10.768	12.8801	2.04973e-34	5.08303e-33	67.2466	UP
MECOM	-1.28525	5.80178	-12.8668	2.36096e-34	5.83332e-33	67.1064	DOWN
RUNX2	-1.19957	8.83265	-12.8028	4.64576e-34	1.1326e-32	66.4352	DOWN
TEAD1	-1.01014	7.64326	-12.7985	4.86013e-34	1.18343e-32	66.3905	DOWN
IFI6	-1.09973	8.54652	-12.7672	6.76125e-34	1.63648e-32	66.0631	DOWN
C11orf80	1.05586	8.09918	12.7402	8.98166e-34	2.15838e-32	65.7816	UP
MATN2	-1.21038	6.91384	-12.7334	9.64793e-34	2.31298e-32	65.7106	DOWN
ADGRD1	-1.40168	4.68071	-12.7313	9.86843e-34	2.36024e-32	65.6882	DOWN
KLF16	1.221	5.65356	12.7257	1.04655e-33	2.48536e-32	65.63	UP
CDC25A	1.0203	7.38331	12.6997	1.37509e-33	3.23137e-32	65.3593	UP
TEDC2	1.01616	5.5922	12.6815	1.66373e-33	3.87807e-32	65.1704	UP
GIMAP7	-1.0837	10.1984	-12.6485	2.3511e-33	5.41156e-32	64.8275	DOWN
MMP2	-1.57751	9.39783	-12.6468	2.39375e-33	5.49991e-32	64.8097	DOWN
HOPX	-1.9014	9.23007	-12.6468	2.39494e-33	5.49991e-32	64.8092	DOWN
NTN4	-1.49233	5.45062	-12.6253	2.99883e-33	6.85554e-32	64.5863	DOWN
ZNF462	-1.28415	5.46515	-12.5888	4.39276e-33	9.92971e-32	64.2078	DOWN
IGSF6	-1.0844	10.0401	-12.5726	5.2009e-33	1.17171e-31	64.0404	DOWN
CD79A	1.02923	10.6893	12.5537	6.33572e-33	1.42103e-31	63.8448	UP
IL7R	-1.24825	10.2436	-12.5333	7.83278e-33	1.74325e-31	63.6345	DOWN
CCL5	-1.23032	11.7138	-12.5077	1.02281e-32	2.25892e-31	63.37	DOWN
FHL2	-1.06261	7.62643	-12.4951	1.16606e-32	2.56685e-31	63.2401	DOWN
ITGB5	-1.17339	7.47182	-12.4869	1.27012e-32	2.78682e-31	63.1553	DOWN
C3	-1.35439	11.2451	-12.4693	1.52371e-32	3.32874e-31	62.9749	DOWN
XRCC3	1.0246	5.51405	12.4606	1.66895e-32	3.63816e-31	62.8846	UP
TIMP1	-1.04385	12.625	-12.4397	2.07082e-32	4.47698e-31	62.6708	DOWN
SRPX2	-1.2713	5.34156	-12.4271	2.3602e-32	5.08462e-31	62.5411	DOWN
UBE2QL1	-1.41896	5.04432	-12.4224	2.47735e-32	5.32565e-31	62.4931	DOWN
LINC00963	-1.09728	5.03773	-12.4185	2.57927e-32	5.53295e-31	62.4531	DOWN
SCML1	-1.03449	7.44785	-12.4141	2.69998e-32	5.77962e-31	62.4078	DOWN
CPM	-1.19342	8.8848	-12.4049	2.97058e-32	6.33201e-31	62.3131	DOWN
COL10A1	-1.38627	5.69141	-12.3924	3.38208e-32	7.16376e-31	62.1845	DOWN
TTC39B	-1.02207	6.66486	-12.3357	6.07205e-32	1.26492e-30	61.6045	DOWN
ST3GAL6	-1.01497	6.20644	-12.3336	6.2045e-32	1.2902e-30	61.5831	DOWN
HMCN1	-1.97469	5.11143	-12.3224	6.9585e-32	1.44066e-30	61.4694	DOWN
ARHGAP33	1.11625	6.47778	12.3042	8.39843e-32	1.72463e-30	61.283	UP
PLAT	-1.03518	6.21281	-12.2798	1.07916e-31	2.20263e-30	61.0345	DOWN
ENPP1	-1.01062	5.75143	-12.1607	3.65762e-31	7.19617e-30	59.8248	DOWN
DPT	-1.36456	7.87992	-12.1445	4.31208e-31	8.42629e-30	59.6617	DOWN
PIM2	1.1168	9.69548	12.1149	5.83237e-31	1.12662e-29	59.3625	UP
FOSL2	-1.16846	7.27676	-12.1061	6.38219e-31	1.23165e-29	59.2732	DOWN
GPT2	1.00017	6.96173	12.1008	6.73153e-31	1.29535e-29	59.2204	UP
TC2N	-1.17992	7.12159	-12.0982	6.91612e-31	1.32834e-29	59.1936	DOWN
C15orf48	-1.86384	9.36602	-12.0804	8.28255e-31	1.58325e-29	59.0149	DOWN
TANC1	-1.05799	7.946	-12.0767	8.60565e-31	1.64035e-29	58.977	DOWN
CD3G	-1.21098	8.20292	-12.0754	8.72037e-31	1.65909e-29	58.9639	DOWN
ARSJ	-1.07608	4.3683	-12.0596	1.02402e-30	1.93548e-29	58.8047	DOWN
BEND6	-1.18081	4.45661	-12.0529	1.09531e-30	2.0625e-29	58.738	DOWN
LRRC17	-1.10968	5.23352	-12.0484	1.14684e-30	2.1555e-29	58.6924	DOWN
PMS2P2	1.00261	5.94906	12.0389	1.26316e-30	2.36312e-29	58.5967	UP
PIM1	1.049	9.65903	12.0281	1.40908e-30	2.62153e-29	58.4884	UP
MCTP1	-1.09612	8.13997	-12.0245	1.46124e-30	2.71109e-29	58.4524	DOWN
NLGN4X	-1.35171	5.42378	-11.9502	3.09806e-30	5.59369e-29	57.7078	DOWN
DPY19L2P2	1.10076	7.08108	11.9272	3.90754e-30	6.99269e-29	57.4778	UP
FAP	-1.55344	7.22066	-11.8968	5.30753e-30	9.38982e-29	57.1744	DOWN
CRISPLD2	-1.13831	8.91787	-11.8856	5.94212e-30	1.04575e-28	57.0626	DOWN
LOC100506388	-1.17842	4.40893	-11.8823	6.14612e-30	1.07883e-28	57.0291	DOWN
ITGBL1	-1.38706	6.04229	-11.827	1.07104e-29	1.83688e-28	56.4789	DOWN
CDH13	-1.20592	4.73651	-11.7654	1.98277e-29	3.3298e-28	55.8688	DOWN
FAM171B	-1.28163	6.98984	-11.7598	2.09647e-29	3.51489e-28	55.8136	DOWN
OMD	-1.42608	5.03695	-11.7109	3.41479e-29	5.65471e-28	55.3303	DOWN
GBP1	-1.13163	11.8523	-11.6921	4.11764e-29	6.79629e-28	55.145	DOWN
LINC00665	1.0252	6.52049	11.6716	5.05056e-29	8.26181e-28	54.9427	UP
RCAN2	-1.03452	6.86708	-11.6668	5.2939e-29	8.63886e-28	54.8961	DOWN
TOP3B	1.1819	5.59114	11.6386	7.00669e-29	1.12969e-27	54.6184	UP
FCRL2	1.53861	9.92248	11.6375	7.08407e-29	1.14125e-27	54.6076	UP
IGF1	-1.16695	7.35567	-11.6295	7.66876e-29	1.23348e-27	54.529	DOWN
DEPDC7	-1.24124	4.61476	-11.593	1.1005e-28	1.75472e-27	54.1713	DOWN
BGN	-1.2893	8.94469	-11.576	1.30258e-28	2.0655e-27	54.0043	DOWN
RGS18	-1.15919	7.62274	-11.5677	1.41399e-28	2.2334e-27	53.9231	DOWN
PRR16	-1.22295	5.32394	-11.5594	1.53471e-28	2.41651e-27	53.8419	DOWN
ANKLE1	1.1292	5.92737	11.5463	1.7452e-28	2.74366e-27	53.7146	UP
PPP1R9B	1.10646	7.5616	11.5457	1.75571e-28	2.75804e-27	53.7087	UP
ACKR3	-1.04747	8.91903	-11.5258	2.13591e-28	3.32445e-27	53.5146	DOWN
COMP	-1.97919	5.77353	-11.5093	2.51321e-28	3.89047e-27	53.3535	DOWN
AEBP1	-1.1867	8.51573	-11.4829	3.25797e-28	5.00879e-27	53.0965	DOWN
MFAP4	-1.3878	5.54549	-11.463	3.96248e-28	6.0734e-27	52.9026	DOWN
ZNF703	-1.04931	5.23293	-11.4516	4.43398e-28	6.77549e-27	52.7913	DOWN
ME1	-1.14986	7.69343	-11.3974	7.53496e-28	1.13254e-26	52.2662	DOWN
F3	-1.10402	7.45942	-11.3908	8.03767e-28	1.20362e-26	52.2023	DOWN
TMEM200A	-1.01948	7.14777	-11.3692	9.92735e-28	1.4724e-26	51.9932	DOWN
TRAT1	-1.34222	8.13478	-11.3649	1.03474e-27	1.52796e-26	51.9522	DOWN
CIZ1	1.08892	7.15593	11.3554	1.1358e-27	1.6723e-26	51.8599	UP
ASPA	-1.01553	4.95927	-11.3451	1.25504e-27	1.84248e-26	51.7611	DOWN
MSX2	-1.11054	4.90485	-11.3363	1.36831e-27	1.9986e-26	51.6755	DOWN
WNT2	-1.16115	5.94063	-11.3206	1.59394e-27	2.31477e-26	51.5244	DOWN
MEOX2	-1.48386	5.84775	-11.2898	2.14955e-27	3.09713e-26	51.2283	DOWN
POLM	1.1422	6.2337	11.2532	3.06838e-27	4.37108e-26	50.876	UP
APCDD1	-1.12528	5.20447	-11.2496	3.17533e-27	4.52025e-26	50.8421	DOWN
TNFRSF11B	-1.03566	6.90059	-11.2268	3.95903e-27	5.5769e-26	50.6237	DOWN
BMP2	-1.17144	5.19472	-11.1891	5.69929e-27	7.96165e-26	50.263	DOWN
IRF4	1.29175	9.92541	11.1752	6.51979e-27	9.0613e-26	50.1299	UP
ANP32A-IT1	1.01929	5.65024	11.0797	1.63255e-26	2.19551e-25	49.2213	UP
CSTA	-1.02621	10.9056	-11.07	1.79277e-26	2.40618e-25	49.1287	DOWN
CD3D	-1.13055	11.0741	-11.061	1.95368e-26	2.61346e-25	49.0436	DOWN
FBLN2	-1.21861	6.05505	-10.9582	5.21083e-26	6.73404e-25	48.0727	DOWN
LENG8	1.05325	7.76768	10.9327	6.6424e-26	8.54035e-25	47.8325	UP
D2HGDH	1.08942	6.97888	10.9026	8.83919e-26	1.12573e-24	47.5498	UP
MALAT1	-1.00369	13.9596	-10.8955	9.44769e-26	1.19793e-24	47.4839	DOWN
CA2	-1.1031	7.59662	-10.8583	1.34443e-25	1.68145e-24	47.1348	DOWN
FRZB	-1.01054	7.51937	-10.8523	1.42276e-25	1.77612e-24	47.0788	DOWN
TMEM150C	-1.02032	7.83622	-10.8432	1.54984e-25	1.9288e-24	46.9941	DOWN
ADGRA3	-1.17225	4.68722	-10.794	2.46409e-25	3.03849e-24	46.5354	DOWN
PTGS2	-1.2805	5.87943	-10.7888	2.58833e-25	3.18391e-24	46.4867	DOWN
ANO1	-1.17603	5.10719	-10.7786	2.84904e-25	3.47707e-24	46.3918	DOWN
ALDH1L2	-1.20652	5.27767	-10.7616	3.34194e-25	4.05167e-24	46.2339	DOWN
RETREG1	-1.26493	7.48964	-10.753	3.62175e-25	4.37777e-24	46.1544	DOWN
THEMIS	-1.2683	7.89853	-10.7361	4.24575e-25	5.11365e-24	45.9971	DOWN
C5orf46	-1.26783	4.60614	-10.6844	6.8864e-25	8.15301e-24	45.5187	DOWN
GHR	-1.03898	5.08051	-10.6771	7.37215e-25	8.70768e-24	45.4512	DOWN
TMEM71	-1.28776	6.81118	-10.5997	1.51611e-24	1.76089e-23	44.738	DOWN
S100B	-1.52983	5.55698	-10.5876	1.69732e-24	1.96007e-23	44.6264	DOWN
INPP4B	-1.00323	7.48244	-10.5784	1.84858e-24	2.12866e-23	44.5419	DOWN
FAM20C	-1.05262	7.56003	-10.5738	1.92798e-24	2.21757e-23	44.5003	DOWN
CCR2	-1.07155	7.95873	-10.5661	2.07133e-24	2.37297e-23	44.4294	DOWN
ANXA3	-1.10288	5.11486	-10.5394	2.65302e-24	3.00696e-23	44.1846	DOWN
RNF144A	-1.04481	5.7053	-10.5389	2.66497e-24	3.01711e-23	44.1802	DOWN
EPHA3	-1.28803	5.82186	-10.4907	4.16057e-24	4.65809e-23	43.7396	DOWN
PRDM15	1.20112	9.30864	10.4625	5.39061e-24	5.99862e-23	43.4835	UP
COL15A1	-1.10763	9.46885	-10.4143	8.39421e-24	9.23409e-23	43.0456	DOWN
RGS4	-1.1225	5.71694	-10.4	9.56978e-24	1.04532e-22	42.916	DOWN
PABPC1L	1.0556	9.11901	10.3835	1.11372e-23	1.20954e-22	42.766	UP
MATN3	-1.26122	3.38772	-10.3722	1.2348e-23	1.33721e-22	42.664	DOWN
SLC38A5	1.04031	6.32501	10.3625	1.34872e-23	1.45357e-22	42.5767	UP
PID1	-1.00407	6.28706	-10.3568	1.42072e-23	1.52871e-22	42.5253	DOWN
NAP1L3	-1.22689	6.28437	-10.3531	1.46997e-23	1.58086e-22	42.4916	DOWN
C3orf80	-1.29513	5.31181	-10.3525	1.47758e-23	1.58736e-22	42.4865	DOWN
CXCL13	-1.21791	12.2846	-10.2907	2.5958e-23	2.73623e-22	41.9294	DOWN
ADAMTS1	-1.06258	7.23526	-10.2846	2.74297e-23	2.88233e-22	41.8749	DOWN
ALDH1A3	-1.21917	6.99895	-10.2606	3.41172e-23	3.56649e-22	41.6592	DOWN
P2RX5	1.11593	11.23	10.2423	4.0262e-23	4.18285e-22	41.4955	UP
IFIT1	-1.30944	7.62434	-10.2393	4.13885e-23	4.29325e-22	41.4682	DOWN
PPARG	-1.06725	5.23332	-10.204	5.69654e-23	5.84895e-22	41.1524	DOWN
COL11A1	-1.94584	5.52344	-10.1985	5.9837e-23	6.13755e-22	41.1038	DOWN
TMEM158	-1.22381	5.52647	-10.1524	9.07163e-23	9.15142e-22	40.6925	DOWN
ISL2	1.00634	5.90442	10.152	9.10537e-23	9.18087e-22	40.6889	UP
GTF2IP20	1.10366	5.82935	10.1309	1.1008e-22	1.10004e-21	40.5013	UP
LIMCH1	-1.10733	5.86231	-10.0623	2.036e-22	2.00188e-21	39.8936	DOWN
PSD3	-1.0334	6.4551	-10.0479	2.31496e-22	2.27064e-21	39.7667	DOWN
GPR171	-1.07448	8.42046	-10.0374	2.54347e-22	2.48392e-21	39.6737	DOWN
HECW2-AS1	-1.11656	4.53953	-10.0274	2.78119e-22	2.70821e-21	39.5854	DOWN
OGN	-1.28573	4.86688	-10.0043	3.41687e-22	3.31442e-21	39.382	DOWN
ADM5	1.00133	5.46005	9.99006	3.87804e-22	3.73128e-21	39.2569	UP
CNTN3	-1.30324	4.40274	-9.93004	6.60659e-22	6.25226e-21	38.7305	DOWN
AK9	-1.12037	5.70673	-9.9291	6.66179e-22	6.30154e-21	38.7223	DOWN
MFAP5	-1.22372	7.76629	-9.92689	6.79295e-22	6.41359e-21	38.703	DOWN
COL21A1	-1.02808	4.91605	-9.89773	8.79195e-22	8.22783e-21	38.4482	DOWN
FOS	-1.37183	8.44119	-9.86644	1.15875e-21	1.07592e-20	38.1754	DOWN
CLIC6	-1.079	6.42742	-9.86042	1.22186e-21	1.1314e-20	38.123	DOWN
CX3CR1	-1.14475	7.16937	-9.85337	1.30006e-21	1.20215e-20	38.0618	DOWN
LOC339260	1.142	5.06632	9.83307	1.55423e-21	1.42868e-20	37.8854	UP
CECR7	1.04476	5.69356	9.81137	1.88073e-21	1.71707e-20	37.697	UP
LOC101928068	1.00645	5.72529	9.79894	2.09727e-21	1.90701e-20	37.5894	UP
CYTL1	-1.06394	4.71104	-9.79334	2.20283e-21	1.99849e-20	37.5409	DOWN
SPOCK1	-1.16683	5.41177	-9.7909	2.25042e-21	2.03892e-20	37.5198	DOWN
WT1	-1.31004	4.13395	-9.79041	2.26014e-21	2.04589e-20	37.5155	DOWN
LRRC15	-1.33098	7.262	-9.71208	4.48013e-21	3.94572e-20	36.8397	DOWN
EVC	-1.0627	5.71097	-9.67982	5.93165e-21	5.16773e-20	36.5626	DOWN
FOLR1	-1.37162	10.4327	-9.65395	7.42463e-21	6.4351e-20	36.3409	DOWN
ADIRF	-1.29644	5.79082	-9.6191	1.00392e-20	8.60878e-20	36.043	DOWN
EML6	1.77111	8.78487	9.59301	1.2577e-20	1.07032e-19	35.8205	UP
TFPI2	-1.7547	4.93818	-9.46049	3.92208e-20	3.22621e-19	34.6977	DOWN
STEAP2	-1.29257	5.28031	-9.4051	6.28659e-20	5.09848e-19	34.2321	DOWN
MIR142	1.25908	9.44526	9.3973	6.71727e-20	5.42162e-19	34.1667	UP
FBLN5	-1.02173	6.11229	-9.39342	6.94241e-20	5.6011e-19	34.1341	DOWN
SH2D1A	-1.06031	9.10831	-9.37869	7.86646e-20	6.32135e-19	34.0108	DOWN
RASEF	-1.12012	9.75863	-9.37655	8.01075e-20	6.42707e-19	33.9929	DOWN
CNTN4	-1.05658	4.55039	-9.35037	9.99956e-20	7.98146e-19	33.774	DOWN
ST8SIA1	-1.02803	6.08885	-9.34772	1.02259e-19	8.14919e-19	33.752	DOWN
SLAMF1	-1.0994	8.58566	-9.3111	1.39333e-19	1.09566e-18	33.4467	DOWN
PI15	-1.58398	6.48276	-9.27295	1.92113e-19	1.49441e-18	33.1297	DOWN
TBC1D27P	1.0347	6.97681	9.26988	1.97135e-19	1.53112e-18	33.1043	UP
DACT1	-1.08688	5.96661	-9.25547	2.22506e-19	1.72286e-18	32.9848	DOWN
C3orf14	-1.10245	8.38602	-9.24996	2.33019e-19	1.80219e-18	32.9393	DOWN
PPP1R14A	-1.23078	4.06622	-9.24874	2.35433e-19	1.81947e-18	32.9291	DOWN
ABCA8	-1.21844	5.46013	-9.20856	3.29629e-19	2.5252e-18	32.5971	DOWN
FCRL5	1.07506	11.128	9.183	4.08059e-19	3.11068e-18	32.3866	UP
ITGB8	-1.23164	6.06417	-9.16447	4.76234e-19	3.60317e-18	32.2342	DOWN
SPP1	-1.41597	9.65456	-9.15904	4.98286e-19	3.76015e-18	32.1895	DOWN
CEMIP	-1.23156	7.28928	-9.14611	5.54908e-19	4.17028e-18	32.0834	DOWN
CYR61	-1.03465	9.67558	-9.13701	5.98481e-19	4.48605e-18	32.0088	DOWN
IGFBP2	-1.10954	6.47423	-9.0864	9.10642e-19	6.74082e-18	31.5948	DOWN
CTSZ	-1.06996	10.8168	-9.08425	9.26976e-19	6.84917e-18	31.5773	DOWN
SELE	-1.1266	5.8647	-9.02294	1.53746e-18	1.11959e-17	31.0783	DOWN
MYH11	-1.20863	6.79935	-8.99499	1.93463e-18	1.40023e-17	30.8518	DOWN
KLRB1	-1.12022	7.48882	-8.95877	2.60347e-18	1.86824e-17	30.559	DOWN
RUBCNL	1.20227	10.9127	8.9063	3.99597e-18	2.82928e-17	30.1366	UP
KCNK1	-1.11603	6.09618	-8.81671	8.26802e-18	5.70008e-17	29.42	DOWN
GREM1	-1.24788	7.38108	-8.75818	1.32529e-17	9.01966e-17	28.955	DOWN
GJB2	-1.33714	5.9436	-8.74949	1.42113e-17	9.64916e-17	28.8862	DOWN
RNF128	-1.08698	3.73969	-8.73317	1.62013e-17	1.09524e-16	28.7571	DOWN
MAP7	-1.22757	5.14415	-8.71278	1.9078e-17	1.28455e-16	28.5961	DOWN
TMEM17	-1.00162	4.95989	-8.7015	2.08794e-17	1.40117e-16	28.5072	DOWN
PDE4DIP	-1.1359	7.06396	-8.65133	3.11615e-17	2.06171e-16	28.1127	DOWN
COL5A1	-1.19582	7.92761	-8.64281	3.33492e-17	2.20067e-16	28.0459	DOWN
ICOS	-1.22059	6.82172	-8.59863	4.73632e-17	3.09309e-16	27.7003	DOWN
UBASH3A	-1.09664	5.92368	-8.58338	5.34438e-17	3.47781e-16	27.5813	DOWN
FABP4	-1.63989	7.49407	-8.57803	5.57538e-17	3.62229e-16	27.5397	DOWN
CXCL14	-1.54749	8.72417	-8.55793	6.53523e-17	4.22685e-16	27.3832	DOWN
ADRA2A	-1.00297	6.70604	-8.51492	9.17102e-17	5.86957e-16	27.0496	DOWN
RNA45SN5	1.02568	8.15107	8.50154	1.0188e-16	6.49368e-16	26.946	UP
GPM6A	1.3702	6.1497	8.43986	1.65135e-16	1.0349e-15	26.4705	UP
MSR1	-1.25501	6.48671	-8.33621	3.69464e-16	2.25385e-15	25.6778	DOWN
SLC12A8	-1.09695	6.78025	-8.33305	3.78614e-16	2.30688e-15	25.6538	DOWN
P2RY12	-1.16421	7.81619	-8.31862	4.23235e-16	2.56328e-15	25.5441	DOWN
CDHR3	1.01806	5.71408	8.31384	4.39132e-16	2.65637e-15	25.5078	UP
CILP	-1.29594	8.02916	-8.26845	6.2277e-16	3.7182e-15	25.164	DOWN
ADARB1	-1.00879	7.08846	-8.26376	6.45603e-16	3.84883e-15	25.1286	DOWN
POTEM	1.05797	6.376	8.20802	9.89257e-16	5.80836e-15	24.7087	UP
SACS-AS1	1.20267	4.99937	8.17995	1.22529e-15	7.15466e-15	24.4982	UP
ADAMTS2	-1.09791	7.34509	-8.1778	1.24559e-15	7.26479e-15	24.4821	DOWN
PCSK1	-1.02222	3.95215	-8.08557	2.50548e-15	1.42587e-14	23.7947	DOWN
TREM1	-1.06826	5.52805	-7.93437	7.77021e-15	4.25643e-14	22.6821	DOWN
LINC01297	1.02017	4.99588	7.90741	9.49047e-15	5.14986e-14	22.4855	UP
S100A8	-1.31117	11.1986	-7.86142	1.33318e-14	7.15745e-14	22.1516	DOWN
HPDL	1.00374	5.42734	7.83557	1.61261e-14	8.59801e-14	21.9646	UP
ZNF215	1.00833	6.64922	7.7935	2.19576e-14	1.15576e-13	21.6614	UP
LGALS2	-1.09271	8.11667	-7.78907	2.26812e-14	1.19137e-13	21.6295	DOWN
KLHL14	1.17894	9.47964	7.78224	2.38432e-14	1.25013e-13	21.5805	UP
SCARA5	-1.08554	6.64546	-7.65429	6.03801e-14	3.03721e-13	20.668	DOWN
S100A9	-1.11183	9.68864	-7.60139	8.83367e-14	4.38124e-13	20.2945	DOWN
MYOCD	1.14871	5.47766	7.48936	1.96311e-13	9.47114e-13	19.5109	UP
CES1	-1.03175	6.59773	-7.46107	2.39791e-13	1.14756e-12	19.3146	DOWN
EPYC	-1.14511	4.28867	-7.35093	5.19484e-13	2.41256e-12	18.5564	DOWN
MAML3	-1.01133	6.89581	-7.34585	5.38208e-13	2.49524e-12	18.5217	DOWN
SUSD5	-1.00247	4.12728	-7.32245	6.33442e-13	2.91467e-12	18.362	DOWN
MT1M	-1.32581	5.60466	-7.15918	1.95053e-12	8.65159e-12	17.2598	DOWN
CCL20	-1.04891	4.2616	-6.96317	7.31767e-12	3.07227e-11	15.9653	DOWN
CTTNBP2	-1.02951	3.52244	-6.85804	1.46834e-11	5.99029e-11	15.2839	DOWN
CCL8	-1.00175	8.94662	-6.81358	1.96594e-11	7.9358e-11	14.9985	DOWN
CXCL8	-1.12017	6.74663	-6.81324	1.97033e-11	7.94983e-11	14.9963	DOWN
NPY1R	-1.07701	5.08244	-6.7168	3.69018e-11	1.45261e-10	14.383	DOWN
MYRIP	-1.07251	4.99948	-6.70429	4.00079e-11	1.57059e-10	14.304	DOWN
CRNDE	-1.17069	7.96638	-6.70239	4.0501e-11	1.58872e-10	14.292	DOWN
MMP1	-1.37801	7.91581	-6.54584	1.10163e-10	4.15268e-10	13.3147	DOWN
LTF	-1.39158	5.36213	-6.52983	1.219e-10	4.57372e-10	13.2159	DOWN
TCL1A	1.298	10.2145	6.42675	2.32692e-10	8.50927e-10	12.585	UP
SPINK2	-1.23958	6.28842	-6.16333	1.16672e-09	4.01763e-09	11.0137	DOWN
TEX9	-1.02561	7.60355	-6.16305	1.16865e-09	4.02291e-09	11.0121	DOWN
MIS18BP1	-1.05302	8.55274	-5.99021	3.26154e-09	1.07507e-08	10.0134	DOWN

## Sheet: Table7
Supplementary Table-S7: Functional enrichment analyses of subclass specific genes
NMFTYPE1 Specific functional enrichment
ONTOLOGY	ID	Description	GeneRatio	BgRatio	pvalue	p.adjust	qvalue	geneID	Count
MF	GO:0140097	catalytic activity, acting on DNA	7/55	152/16969	5.70243e-07	8.2115e-05	6.90294e-05	1663/3978/27434/10721/9401/8940/7517	7
MF	GO:0008094	DNA-dependent ATPase activity	4/55	72/16969	8.62797e-05	0.00621214	0.00522219	1663/10721/9401/7517	4
NMFTYPE2 Specific functional enrichment
ONTOLOGY	ID	Description	GeneRatio	BgRatio	pvalue	p.adjust	qvalue	geneID	Count
BP	GO:0030198	extracellular matrix organization	62/438	334/17913	1.02109e-36	4.14663e-33	3.13742e-33	25890/8038/9509/11096/165/84168/633/151887/1300/1301/1303/7373/1278/1281/1289/1290/1293/1295/1311/83716/55790/1513/1545/1634/25975/2191/2192/2199/10516/2200/2335/26585/5654/3672/3685/3693/3696/3910/3912/4015/4060/4148/4237/4239/8076/4312/4313/4629/22795/10609/5156/10630/6423/64094/6696/23213/7057/7076/7077/4982/1462/7490	62
BP	GO:0043062	extracellular structure organization	62/438	387/17913	7.35334e-33	1.4931e-29	1.12971e-29	25890/8038/9509/11096/165/84168/633/151887/1300/1301/1303/7373/1278/1281/1289/1290/1293/1295/1311/83716/55790/1513/1545/1634/25975/2191/2192/2199/10516/2200/2335/26585/5654/3672/3685/3693/3696/3910/3912/4015/4060/4148/4237/4239/8076/4312/4313/4629/22795/10609/5156/10630/6423/64094/6696/23213/7057/7076/7077/4982/1462/7490	62
BP	GO:0030199	collagen fibril organization	16/438	45/17913	4.20246e-15	5.68873e-12	4.3042e-12	9509/165/1301/1303/7373/1278/1281/1289/1290/1311/1545/26585/4015/4060/10609/6423	16
BP	GO:0031589	cell-substrate adhesion	36/438	322/17913	2.62712e-14	2.66718e-11	2.01804e-11	25890/8754/84168/151887/1012/1281/1295/1842/10085/1942/25975/2013/2042/2192/10516/10979/2335/8324/2633/26585/3672/3685/3693/182/3912/22998/22795/8829/55742/10630/10631/5796/64094/6695/7057/51330	36
BP	GO:0001501	skeletal system development	42/438	479/17913	7.58102e-13	6.1573e-10	4.65873e-10	650/1009/1300/1301/1278/1281/1311/55790/1513/54360/2202/2121/56975/2200/2487/2697/26585/3479/3696/4015/10234/4057/4060/4094/4148/4256/4313/4488/5125/56034/5156/5358/5396/860/6423/6424/6591/23213/7045/7076/4982/7291	42
BP	GO:0061448	connective tissue development	29/438	243/17913	1.80262e-12	1.22007e-09	9.2313e-10	59/650/1301/1289/1311/55790/1513/54360/2202/2121/2487/26585/3400/3696/4015/4060/4094/4256/4488/5396/860/140606/6423/6591/23111/23213/7045/7076/7490	29
BP	GO:0007178	transmembrane receptor protein serine/threonine kinase signaling pathway	33/438	323/17913	4.04568e-12	2.34707e-09	1.77584e-09	8754/54829/650/858/91851/8483/1278/1281/1311/27122/2200/10979/2348/2353/11167/26585/5654/3624/3693/4015/4053/4488/56937/5796/860/6423/6424/23213/7041/7057/25937/23090/80139	33
BP	GO:0060485	mesenchyme development	28/438	258/17913	4.34559e-11	2.20593e-08	1.66905e-08	59/650/1909/1910/1942/2042/2335/2348/2487/26585/3357/182/4254/4488/8829/10630/6091/10512/6423/6591/7041/7291/7472/7490/25937/10413/23414/80139	28
BP	GO:0045765	regulation of angiogenesis	34/438	383/17913	9.21451e-11	4.15779e-08	3.14587e-08	8038/301/306/718/729230/1524/10563/3576/1545/1634/1942/2013/2152/2627/26585/3696/9314/4223/8829/10769/5468/5740/5743/6423/64094/10253/27286/23213/7057/7058/7098/51330/23554/7291	34
BP	GO:1901342	regulation of vasculature development	35/438	425/17913	3.75861e-10	1.52637e-07	1.15488e-07	8038/301/306/718/729230/1524/10563/3576/1545/1634/1942/2013/2152/2627/26585/3696/9314/4223/8829/10769/5468/5740/5743/6423/64094/10253/27286/23213/7057/7058/7098/51330/23554/7291/7490	35
BP	GO:0035987	endodermal cell differentiation	12/438	45/17913	5.44687e-10	2.01089e-07	1.52148e-07	1301/1303/1289/1290/1295/2335/2627/3624/3685/3693/3912/4313	12
BP	GO:0051216	cartilage development	22/438	182/17913	7.05236e-10	2.20642e-07	1.66942e-07	650/1301/1311/55790/1513/54360/2202/2121/2487/26585/3696/4060/4094/4256/4488/5396/860/6423/6591/23213/7045/7076	22
BP	GO:0048762	mesenchymal cell differentiation	23/438	199/17913	7.06314e-10	2.20642e-07	1.66942e-07	650/1909/1910/1942/2042/2335/2348/2487/26585/3357/182/4254/4488/8829/10630/10512/6423/6591/7041/7291/7472/25937/80139	23
BP	GO:0071559	response to transforming growth factor beta	25/438	239/17913	1.0624e-09	3.08171e-07	2.33168e-07	8754/54829/858/8483/1278/1281/1524/27122/2200/10979/2348/2353/5654/3693/4015/4053/25878/50507/56937/10631/5796/7041/7057/7472/80139	25
BP	GO:0001706	endoderm formation	12/438	50/17913	2.05823e-09	5.57233e-07	4.21613e-07	1301/1303/1289/1290/1295/2335/2627/3624/3685/3693/3912/4313	12
BP	GO:0003007	heart morphogenesis	25/438	249/17913	2.49477e-09	6.33204e-07	4.79095e-07	9510/650/1301/1289/1363/1942/2348/2627/2697/3357/182/9645/4488/4886/8829/55742/6091/10512/6423/6591/7168/7291/7472/10413/23414	25
BP	GO:0071560	cellular response to transforming growth factor beta stimulus	24/438	233/17913	3.13745e-09	7.49481e-07	5.67072e-07	8754/54829/858/8483/1278/1281/1524/27122/2200/10979/2348/2353/5654/3693/4015/4053/50507/56937/10631/5796/7041/7057/7472/80139	24
BP	GO:0045766	positive regulation of angiogenesis	22/438	203/17913	5.5994e-09	1.26329e-06	9.55828e-07	8038/301/306/718/1524/3576/1545/2152/2627/26585/3696/9314/8829/10769/5740/5743/6423/64094/27286/7057/7098/7291	22
BP	GO:0001503	ossification	31/438	388/17913	8.06471e-09	1.72373e-06	1.3042e-06	54829/650/1009/91851/1301/1278/1290/1311/55790/115908/1513/5167/56975/2697/26585/3400/3479/182/4015/4057/4256/4313/4488/4958/5743/860/6423/6591/7291/1462/25937	31
BP	GO:0050678	regulation of epithelial cell proliferation	30/438	369/17913	9.49883e-09	1.92874e-06	1.45932e-06	650/858/6352/1012/6387/1910/2152/2252/8324/2697/3357/5654/3479/687/3912/4163/7026/8829/5468/5796/6091/6423/6591/23213/6934/7057/7291/7472/10413/80139	30
BP	GO:0052547	regulation of peptidase activity	31/438	398/17913	1.46307e-08	2.8293e-06	2.1407e-06	3730/84168/718/1293/51232/1475/1942/2149/2152/2192/2335/2537/9314/4057/56925/5118/51050/5468/5627/5743/6091/6279/6280/6423/6695/7035/7980/7057/7076/7077/7078	31
BP	GO:0090092	regulation of transmembrane receptor protein serine/threonine kinase signaling pathway	22/438	215/17913	1.61907e-08	2.98865e-06	2.26127e-06	54829/650/858/91851/8483/27122/2200/2348/26585/5654/3624/4015/4488/56937/6423/6424/23213/7041/7057/25937/23090/80139	22
BP	GO:0001667	ameboidal-type cell migration	33/438	446/17913	1.73582e-08	3.06485e-06	2.31893e-06	8754/301/306/1012/10563/1545/1634/1910/1942/2013/2191/2252/2335/2348/26585/3357/4254/9314/4163/4223/7026/8829/64805/10769/5468/5743/6091/10512/64094/27286/7057/7076/7291	33
BP	GO:0050673	epithelial cell proliferation	32/438	425/17913	1.90706e-08	3.2269e-06	2.44154e-06	650/858/6352/1012/1295/6387/1910/2152/2191/2252/8324/2697/3357/5654/3479/687/3912/4163/7026/8829/5468/5796/6091/6423/6591/23213/6934/7057/7291/7472/10413/80139	32
BP	GO:0090287	regulation of cellular response to growth factor stimulus	25/438	276/17913	2.02025e-08	3.28169e-06	2.48299e-06	54829/858/91851/10563/1634/27122/56975/2200/2348/26585/5654/4015/4488/56937/6091/860/6423/6424/64094/10253/23213/7041/7057/23090/80139	25
BP	GO:0045598	regulation of fat cell differentiation	17/438	131/17913	2.13067e-08	3.32794e-06	2.51799e-06	10974/650/83643/5167/2487/3400/182/4488/5468/5743/5919/6095/6423/6591/7041/25937/23414	17
BP	GO:0010810	regulation of cell-substrate adhesion	21/438	201/17913	2.38771e-08	3.59129e-06	2.71724e-06	25890/151887/1012/1295/10085/25975/2013/2042/2192/2335/8324/2633/26585/182/22998/8829/10630/10631/64094/6695/7057	21
BP	GO:0001704	formation of primary germ layer	16/438	117/17913	2.60898e-08	3.78395e-06	2.86301e-06	1301/1303/1289/1290/1295/2335/8324/2627/3624/3685/3693/9314/3912/4313/6423/79971	16
BP	GO:0048771	tissue remodeling	19/438	170/17913	3.76468e-08	5.27184e-06	3.98878e-06	301/633/760/729230/115908/1513/2034/2149/2697/26585/3600/3606/182/50507/10609/84870/10512/7076/4982	19
BP	GO:0006939	smooth muscle contraction	15/438	105/17913	3.92059e-08	5.30717e-06	4.01551e-06	59/150/10203/1311/9732/1909/1910/2149/2982/3357/4629/4638/5592/5743/23213	15
BP	GO:0006029	proteoglycan metabolic process	13/438	79/17913	5.69821e-08	7.32102e-06	5.53922e-06	633/650/337876/1301/55790/54360/1634/92126/9953/3479/23213/6934/1462	13
BP	GO:0030282	bone mineralization	15/438	108/17913	5.76884e-08	7.32102e-06	5.53922e-06	54829/650/1278/1311/5167/56975/2697/26585/3479/4015/4057/4256/4958/5743/7291	15
BP	GO:1904018	positive regulation of vasculature development	22/438	232/17913	6.40974e-08	7.88787e-06	5.96812e-06	8038/301/306/718/1524/3576/1545/2152/2627/26585/3696/9314/8829/10769/5740/5743/6423/64094/27286/7057/7098/7291	22
BP	GO:0014033	neural crest cell differentiation	12/438	70/17913	1.15903e-07	1.38436e-05	1.04744e-05	1909/1910/2335/2348/2487/3357/182/4254/8829/10512/6591/7291	12
BP	GO:0045444	fat cell differentiation	21/438	222/17913	1.33408e-07	1.51488e-05	1.14619e-05	10974/10124/650/83643/5167/2167/2487/3400/182/9314/4488/5468/5743/5919/6095/6423/6591/6934/7041/25937/23414	21
BP	GO:0007179	transforming growth factor beta receptor signaling pathway	19/438	184/17913	1.34291e-07	1.51488e-05	1.14619e-05	8754/54829/858/1278/1281/27122/2200/10979/2348/2353/5654/3693/4015/4053/56937/5796/7041/7057/80139	19
BP	GO:0033002	muscle cell proliferation	22/438	243/17913	1.45495e-07	1.5969e-05	1.20825e-05	9510/10203/6352/1012/2627/2697/3479/3600/3606/9314/4313/4969/5136/5468/5592/5743/6934/7057/7168/7472/10413/23414	22
BP	GO:0034446	substrate adhesion-dependent cell spreading	13/438	86/17913	1.60895e-07	1.71945e-05	1.30097e-05	84168/1942/2192/10979/2335/8324/2633/3685/3912/8829/55742/10630/10631	13
BP	GO:0007492	endoderm development	12/438	73/17913	1.87456e-07	1.95195e-05	1.47688e-05	1301/1303/1289/1290/1295/2335/2627/3624/3685/3693/3912/4313	12
BP	GO:0060348	bone development	19/438	189/17913	2.05119e-07	2.08247e-05	1.57564e-05	650/1311/55790/56975/2200/2697/26585/3479/4015/10234/4057/4488/56034/5358/860/6423/6424/23213/7291	19
BP	GO:0014032	neural crest cell development	11/438	61/17913	2.29242e-07	2.27061e-05	1.71799e-05	1909/1910/2335/2348/3357/182/4254/8829/10512/6591/7291	11
BP	GO:0031214	biomineral tissue development	17/438	154/17913	2.3563e-07	2.27832e-05	1.72382e-05	54829/650/1278/1311/5167/56975/2697/26585/3479/4015/4057/4256/4488/4958/5743/6696/7291	17
BP	GO:1903034	regulation of response to wounding	18/438	173/17913	2.56279e-07	2.42035e-05	1.83128e-05	150/301/2149/2152/2191/2697/9314/4638/5156/10630/5327/5592/5627/64094/6696/7035/7057/51330	18
BP	GO:0060326	cell chemotaxis	22/438	253/17913	2.9365e-07	2.68145e-05	2.02884e-05	301/6364/6352/729230/6387/10563/9547/3576/9732/1910/26585/3672/4015/1902/8829/55742/5156/5919/6279/6280/64094/7057	22
BP	GO:0010721	negative regulation of cell development	25/438	317/17913	2.97132e-07	2.68145e-05	2.02884e-05	152330/1281/1522/85458/1809/1910/1942/2192/2200/2487/2633/3400/3479/182/1902/4057/8829/10769/5376/10631/5999/23111/6695/6696/26022	25
BP	GO:0007160	cell-matrix adhesion	20/438	214/17913	3.23036e-07	2.85185e-05	2.15776e-05	8754/1012/1281/1842/2013/2042/10516/10979/2335/26585/3672/3685/3693/182/22998/22795/8829/10631/5796/7057	20
BP	GO:0006024	glycosaminoglycan biosynthetic process	14/438	107/17913	3.40218e-07	2.93962e-05	2.22418e-05	633/57214/337876/55790/1634/92126/10082/9953/4060/4969/4958/6383/10402/1462	14
BP	GO:0051271	negative regulation of cellular component movement	27/438	365/17913	3.58632e-07	2.98038e-05	2.25501e-05	104/1281/1524/6387/10563/1545/1634/1809/2192/26585/182/9314/22998/4163/79772/4223/7026/8829/5468/5592/5796/6091/6423/23213/7057/7076/7168	27
BP	GO:0045785	positive regulation of cell adhesion	28/438	388/17913	3.59612e-07	2.98038e-05	2.25501e-05	25890/8754/301/151887/6352/729230/1012/1295/6387/10563/10085/25975/2013/2335/29851/3479/3485/3600/3606/3575/3685/8829/64805/10630/6423/64094/10673/7168	28
BP	GO:0006023	aminoglycan biosynthetic process	14/438	108/17913	3.82296e-07	3.10501e-05	2.34931e-05	633/57214/337876/55790/1634/92126/10082/9953/4060/4969/4958/6383/10402/1462	14
BP	GO:0060537	muscle tissue development	28/438	392/17913	4.42552e-07	3.31878e-05	2.51106e-05	650/858/1301/1281/1634/2353/8324/2627/2697/26585/3479/4015/4223/4629/4638/50507/7026/5156/5350/5999/6285/10512/7168/7291/7472/7490/10413/23414	28
BP	GO:0061041	regulation of wound healing	16/438	143/17913	4.4333e-07	3.31878e-05	2.51106e-05	150/301/2149/2152/2191/2697/4638/5156/10630/5327/5592/5627/64094/7035/7057/51330	16
BP	GO:0045861	negative regulation of proteolysis	25/438	324/17913	4.47731e-07	3.31878e-05	2.51106e-05	3730/718/1293/51232/1475/1522/1942/2619/2537/9314/4057/56925/51050/5327/5627/5743/6423/6695/7035/7980/7057/7076/7077/7078/26022	25
BP	GO:0014031	mesenchymal cell development	11/438	65/17913	4.49478e-07	3.31878e-05	2.51106e-05	1909/1910/2335/2348/3357/182/4254/8829/10512/6591/7291	11
BP	GO:0048864	stem cell development	11/438	65/17913	4.49478e-07	3.31878e-05	2.51106e-05	1909/1910/2335/2348/3357/182/4254/8829/10512/6591/7291	11
BP	GO:2000146	negative regulation of cell motility	26/438	347/17913	4.63395e-07	3.36044e-05	2.54258e-05	104/1281/1524/6387/10563/1545/1634/1809/2192/26585/182/9314/22998/4163/79772/4223/7026/5468/5592/5796/6091/6423/23213/7057/7076/7168	26
BP	GO:0030166	proteoglycan biosynthetic process	10/438	53/17913	5.24959e-07	3.68513e-05	2.78824e-05	633/337876/55790/54360/1634/92126/9953/3479/6934/1462	10
BP	GO:0003151	outflow tract morphogenesis	12/438	80/17913	5.26318e-07	3.68513e-05	2.78824e-05	2348/2627/182/4488/4886/8829/55742/6091/10512/6423/7291/23414	12
BP	GO:0045669	positive regulation of osteoblast differentiation	11/438	67/17913	6.17591e-07	4.23024e-05	3.20069e-05	650/115908/56975/2697/3400/3479/182/4057/4488/860/6423	11
BP	GO:0010466	negative regulation of peptidase activity	20/438	223/17913	6.25005e-07	4.23024e-05	3.20069e-05	3730/718/1293/51232/1475/2537/9314/4057/56925/51050/5627/5743/6423/6695/7035/7980/7057/7076/7077/7078	20
BP	GO:0002062	chondrocyte differentiation	13/438	97/17913	6.75251e-07	4.43407e-05	3.3549e-05	650/1301/1311/54360/2202/26585/4094/4488/860/6423/6591/23213/7045	13
BP	GO:0040013	negative regulation of locomotion	27/438	377/17913	6.76957e-07	4.43407e-05	3.3549e-05	104/1281/1524/6387/10563/1545/1634/1809/2192/26585/182/9314/22998/4163/79772/4223/7026/8829/5468/5592/5796/6091/6423/23213/7057/7076/7168	27
BP	GO:0030336	negative regulation of cell migration	25/438	332/17913	7.04428e-07	4.54077e-05	3.43563e-05	104/1281/1524/6387/10563/1545/1634/1809/26585/182/9314/22998/4163/79772/4223/7026/5468/5592/5796/6091/6423/23213/7057/7076/7168	25
BP	GO:0008217	regulation of blood pressure	17/438	169/17913	8.8984e-07	5.64632e-05	4.27211e-05	59/1066/1278/1522/1909/1910/2013/2149/2697/2982/4886/7026/5125/10631/5468/5743/7168	17
BP	GO:2000027	regulation of animal organ morphogenesis	21/438	250/17913	9.64192e-07	6.02398e-05	4.55786e-05	54829/650/115908/51339/2252/8324/10082/26585/182/59277/6091/84870/860/10512/6423/6591/23213/4982/7291/7472/7490	21
BP	GO:0048660	regulation of smooth muscle cell proliferation	17/438	172/17913	1.13924e-06	7.00977e-05	5.30373e-05	9510/10203/6352/1012/3479/3600/3606/9314/4313/4969/5136/5468/5592/5743/6934/7057/7168	17
BP	GO:0048568	embryonic organ development	28/438	413/17913	1.25162e-06	7.58632e-05	5.73995e-05	220/1301/115908/3576/2202/1942/2034/2200/2348/2487/2697/4254/121227/4237/9645/7026/5125/56034/5156/5396/5919/84870/860/10253/7291/7472/10413/23414	28
BP	GO:0048659	smooth muscle cell proliferation	17/438	174/17913	1.33897e-06	7.9964e-05	6.05023e-05	9510/10203/6352/1012/3479/3600/3606/9314/4313/4969/5136/5468/5592/5743/6934/7057/7168	17
BP	GO:0045165	cell fate commitment	20/438	238/17913	1.73725e-06	0.000102246	7.73615e-05	650/2034/8324/2619/2627/182/9314/7026/8829/10630/5468/5396/6095/860/6423/10253/6934/7041/7490/25925	20
BP	GO:0061138	morphogenesis of a branching epithelium	17/438	178/17913	1.83607e-06	0.000106518	8.05938e-05	650/1522/1909/2252/26585/4488/8829/59277/84870/10512/6423/6591/10253/23213/7472/7490/10413	17
BP	GO:1900046	regulation of hemostasis	11/438	75/17913	1.97499e-06	0.000112136	8.4844e-05	1311/2149/2152/2191/5156/10630/5327/5592/5627/7035/7057	11
BP	GO:0030278	regulation of ossification	18/438	199/17913	2.0136e-06	0.000112136	8.4844e-05	650/1311/115908/5167/56975/2697/26585/3400/3479/182/4057/4256/4488/4958/860/6423/6591/7291	18
BP	GO:0033627	cell adhesion mediated by integrin	10/438	61/17913	2.03892e-06	0.000112136	8.4844e-05	8754/6352/10563/1545/1942/2200/3685/64805/6423/6591	10
BP	GO:0003012	muscle system process	29/438	448/17913	2.04335e-06	0.000112136	8.4844e-05	59/150/781/10203/800/1193/1311/9732/1909/1910/2149/2627/2697/2982/3357/3479/3600/3672/3693/9314/4629/4638/5350/5592/5743/5999/8082/23213/7168	29
BP	GO:0014706	striated muscle tissue development	26/438	376/17913	2.09721e-06	0.000113557	8.59193e-05	650/858/1301/1634/2353/8324/2627/2697/26585/3479/4015/4223/4629/50507/7026/5156/5350/5999/6285/10512/7168/7291/7472/7490/10413/23414	26
BP	GO:0010717	regulation of epithelial to mesenchymal transition	12/438	91/17913	2.16258e-06	0.000115556	8.74316e-05	650/1942/2042/26585/182/10630/6423/6934/7041/7291/25937/80139	12
BP	GO:0007517	muscle organ development	27/438	403/17913	2.43019e-06	0.000128169	9.6975e-05	104/650/858/1301/1281/1293/1634/2121/2273/2353/8324/2627/2697/26585/3479/4015/4223/4638/7026/5999/6285/7168/7291/7472/7490/10413/23414	27
BP	GO:0001755	neural crest cell migration	8/438	37/17913	2.48314e-06	0.000129283	9.78178e-05	1910/2335/2348/3357/4254/8829/10512/7291	8
BP	GO:0042476	odontogenesis	14/438	126/17913	2.52788e-06	0.000129946	9.83196e-05	11096/54829/650/760/1278/56975/5654/3624/3912/4488/5156/860/4982/7291	14
BP	GO:0003148	outflow tract septum morphogenesis	7/438	27/17913	2.89597e-06	0.000147006	0.000111228	2627/4488/8829/55742/6091/10512/23414	7
BP	GO:0045667	regulation of osteoblast differentiation	14/438	128/17913	3.0515e-06	0.000151399	0.000114551	650/115908/56975/2697/26585/3400/3479/182/4057/4488/860/6423/6591/7291	14
BP	GO:0019932	second-messenger-mediated signaling	25/438	360/17913	3.05705e-06	0.000151399	0.000114551	283383/150/10203/6364/1012/1193/3576/8445/1910/2274/2633/2770/2982/2983/3357/3479/1902/79772/64805/5350/5592/10231/6401/7057/50852	25
BP	GO:0032103	positive regulation of response to external stimulus	23/438	315/17913	3.31035e-06	0.000158554	0.000119965	718/6352/729230/1012/6387/10563/9547/3576/55601/2152/2167/3600/3606/1902/8829/64805/5743/5919/6279/6280/64094/7057/7098	23
BP	GO:0050818	regulation of coagulation	11/438	79/17913	3.33777e-06	0.000158554	0.000119965	2149/2152/2191/5156/10630/5327/5592/10544/5627/7035/7057	11
BP	GO:0003206	cardiac chamber morphogenesis	14/438	129/17913	3.34788e-06	0.000158554	0.000119965	9510/1301/1363/2627/182/4488/8829/55742/6091/10512/6423/7168/7472/23414	14
BP	GO:0050920	regulation of chemotaxis	17/438	186/17913	3.3577e-06	0.000158554	0.000119965	6352/729230/1012/6387/10563/9547/3576/2152/26585/1902/8829/64805/5156/5919/6091/64094/7057	17
BP	GO:0032060	bleb assembly	5/438	11/17913	3.49539e-06	0.000163159	0.000123449	2012/2013/1902/4638/5376	5
BP	GO:0090130	tissue migration	25/438	363/17913	3.54176e-06	0.000163444	0.000123665	59/8754/301/306/1012/10563/1545/1634/1942/2013/2191/2252/26585/9314/4163/4223/7026/8829/10769/5468/5743/6091/64094/27286/7057	25
BP	GO:0050921	positive regulation of chemotaxis	14/438	130/17913	3.66962e-06	0.000167442	0.00012669	6352/729230/1012/6387/10563/9547/3576/2152/1902/8829/64805/5919/64094/7057	14
BP	GO:0006936	muscle contraction	24/438	343/17913	4.23572e-06	0.000189025	0.00014302	59/150/781/10203/800/1193/1311/9732/1909/1910/2149/2697/2982/3357/3672/3693/4629/4638/5350/5592/5743/8082/23213/7168	24
BP	GO:0032102	negative regulation of response to external stimulus	24/438	343/17913	4.23572e-06	0.000189025	0.00014302	10203/10563/2191/2697/26585/5654/3479/9314/4057/8829/4907/5156/5327/5468/5592/5627/5740/6091/6095/6591/6696/7035/7057/7130	24
BP	GO:0010951	negative regulation of endopeptidase activity	18/438	210/17913	4.32745e-06	0.000191019	0.000144529	3730/718/1293/51232/1475/2537/9314/4057/56925/5627/5743/6423/6695/7035/7980/7057/7076/7078	18
BP	GO:0043542	endothelial cell migration	21/438	275/17913	4.41186e-06	0.000192651	0.000145764	301/306/1012/10563/1545/1634/1942/2013/2191/26585/9314/4223/7026/8829/10769/5468/5743/6091/64094/27286/7057	21
BP	GO:0050900	leukocyte migration	29/438	467/17913	4.61655e-06	0.000199445	0.000150904	301/6364/6352/6355/729230/1278/1524/6387/10563/9547/3576/1910/2059/2335/26585/3554/3672/3685/4254/4312/64805/5627/5919/6279/6280/6383/6401/7057/54210	29
BP	GO:0052548	regulation of endopeptidase activity	25/438	370/17913	4.95789e-06	0.000211937	0.000160356	3730/718/1293/51232/1475/1942/2149/2152/2537/9314/4057/56925/5468/5627/5743/6091/6279/6280/6423/6695/7035/7980/7057/7076/7078	25
BP	GO:0001763	morphogenesis of a branching structure	17/438	192/17913	5.16164e-06	0.000218348	0.000165207	650/1522/1909/2252/26585/4488/8829/59277/84870/10512/6423/6591/10253/23213/7472/7490/10413	17
BP	GO:0016055	Wnt signaling pathway	30/438	498/17913	5.77185e-06	0.000241644	0.000182833	147495/80114/650/1363/115908/51339/85458/27122/10979/2348/2487/8324/10082/26585/3485/9314/4163/84870/6423/6424/6591/23213/6934/7041/23554/79971/7472/25937/10413/80139	30
BP	GO:0198738	cell-cell signaling by wnt	30/438	500/17913	6.24522e-06	0.00025709	0.000194519	147495/80114/650/1363/115908/51339/85458/27122/10979/2348/2487/8324/10082/26585/3485/9314/4163/84870/6423/6424/6591/23213/6934/7041/23554/79971/7472/25937/10413/80139	30
BP	GO:0048545	response to steroid hormone	25/438	375/17913	6.2674e-06	0.00025709	0.000194519	8754/8644/301/760/1407/114907/2274/387758/2353/2706/3176/3485/687/4015/7026/56937/5468/5743/6095/6285/6696/7035/7041/7057/10413	25
BP	GO:0010631	epithelial cell migration	24/438	354/17913	7.24232e-06	0.000292231	0.000221108	8754/301/306/1012/10563/1545/1634/1942/2013/2191/2252/26585/9314/4163/4223/7026/8829/10769/5468/5743/6091/64094/27286/7057	24
BP	GO:0032963	collagen metabolic process	12/438	102/17913	7.268e-06	0.000292231	0.000221108	9509/1306/1278/1289/1513/2149/2191/4239/4312/4313/10609/5468	12
BP	GO:0030203	glycosaminoglycan metabolic process	15/438	157/17913	7.3624e-06	0.000293125	0.000221784	633/57214/337876/55790/1634/92126/10082/9953/3600/4060/4969/4958/6383/10402/1462	15
BP	GO:0007369	gastrulation	16/438	178/17913	8.04926e-06	0.000312819	0.000236685	1301/1303/1289/1290/1295/2335/8324/2627/3624/3685/3693/9314/3912/4313/6423/79971	16
BP	GO:0051043	regulation of membrane protein ectodomain proteolysis	6/438	21/17913	8.20427e-06	0.000312819	0.000236685	8754/150/152503/51429/7076/7078	6
BP	GO:0050679	positive regulation of epithelial cell proliferation	17/438	199/17913	8.3324e-06	0.000312819	0.000236685	650/858/6352/1012/6387/2152/2252/8324/3357/5654/3479/3912/8829/6934/7291/7472/80139	17
BP	GO:0090132	epithelium migration	24/438	357/17913	8.34671e-06	0.000312819	0.000236685	8754/301/306/1012/10563/1545/1634/1942/2013/2191/2252/26585/9314/4163/4223/7026/8829/10769/5468/5743/6091/64094/27286/7057	24
BP	GO:0002687	positive regulation of leukocyte migration	13/438	121/17913	8.36061e-06	0.000312819	0.000236685	6364/6352/6355/729230/6387/10563/9547/3576/3554/4254/64805/5919/7057	13
BP	GO:0030500	regulation of bone mineralization	10/438	71/17913	8.39627e-06	0.000312819	0.000236685	650/1311/5167/56975/2697/26585/4057/4256/4958/7291	10
BP	GO:0042310	vasoconstriction	10/438	71/17913	8.39627e-06	0.000312819	0.000236685	59/150/1311/9732/1909/1910/2149/2697/3357/5743	10
BP	GO:0001837	epithelial to mesenchymal transition	14/438	140/17913	8.75368e-06	0.00032317	0.000244517	650/1942/2042/26585/182/4488/10630/6423/6591/7041/7291/7472/25937/80139	14
BP	GO:0060070	canonical Wnt signaling pathway	22/438	311/17913	8.9505e-06	0.000327459	0.000247762	80114/650/115908/51339/85458/27122/2348/2487/8324/26585/3485/9314/4163/6423/6424/6591/6934/79971/7472/25937/10413/80139	22
BP	GO:0070167	regulation of biomineral tissue development	11/438	88/17913	9.70588e-06	0.000351925	0.000266273	54829/650/1311/5167/56975/2697/26585/4057/4256/4958/7291	11
BP	GO:0060317	cardiac epithelial to mesenchymal transition	7/438	32/17913	9.87538e-06	0.000354902	0.000268526	650/1942/182/4488/6591/7291/7472	7
BP	GO:0006022	aminoglycan metabolic process	15/438	161/17913	9.9998e-06	0.000356221	0.000269524	633/57214/337876/55790/1634/92126/10082/9953/3600/4060/4969/4958/6383/10402/1462	15
BP	GO:0033628	regulation of cell adhesion mediated by integrin	8/438	45/17913	1.16815e-05	0.000412508	0.000312111	8754/6352/10563/1545/1942/64805/6423/6591	8
BP	GO:0035296	regulation of tube diameter	13/438	125/17913	1.19428e-05	0.000414527	0.00031364	59/150/1311/9732/1909/1910/2149/2697/2982/3357/3672/5592/5743	13
BP	GO:0097746	regulation of blood vessel diameter	13/438	125/17913	1.19428e-05	0.000414527	0.00031364	59/150/1311/9732/1909/1910/2149/2697/2982/3357/3672/5592/5743	13
BP	GO:0030111	regulation of Wnt signaling pathway	23/438	341/17913	1.21947e-05	0.000417634	0.00031599	147495/80114/650/115908/51339/85458/27122/2348/2487/8324/26585/3485/4163/84870/6423/6424/6591/23213/6934/79971/25937/10413/80139	23
BP	GO:0030193	regulation of blood coagulation	10/438	74/17913	1.2238e-05	0.000417634	0.00031599	2149/2152/2191/5156/10630/5327/5592/5627/7035/7057	10
BP	GO:0014909	smooth muscle cell migration	11/438	91/17913	1.34394e-05	0.000454812	0.00034412	9510/6352/9732/3479/1902/50507/8829/55742/10631/5592/7168	11
BP	GO:0002685	regulation of leukocyte migration	16/438	186/17913	1.40352e-05	0.000471051	0.000356406	301/6364/6352/6355/729230/1524/6387/10563/9547/3576/26585/3554/4254/64805/5919/7057	16
BP	GO:0045986	negative regulation of smooth muscle contraction	5/438	14/17913	1.42528e-05	0.000474432	0.000358964	10203/9732/2982/5592/5743	5
BP	GO:0018149	peptide cross-linking	7/438	34/17913	1.5131e-05	0.000498378	0.000377082	301/633/1281/1475/1634/2335/7057	7
BP	GO:0071772	response to BMP	14/438	147/17913	1.53404e-05	0.000498378	0.000377082	650/91851/1311/2200/11167/2627/26585/5654/4488/860/6423/6424/23213/23090	14
BP	GO:0071773	cellular response to BMP stimulus	14/438	147/17913	1.53404e-05	0.000498378	0.000377082	650/91851/1311/2200/11167/2627/26585/5654/4488/860/6423/6424/23213/23090	14
BP	GO:0019722	calcium-mediated signaling	16/438	188/17913	1.60456e-05	0.000517153	0.000391288	6364/1012/1193/3576/8445/1910/2274/2633/3357/3479/79772/64805/5350/10231/6401/50852	16
BP	GO:0006027	glycosaminoglycan catabolic process	9/438	61/17913	1.61737e-05	0.000517176	0.000391305	633/57214/1634/10082/4060/4969/4958/6383/1462	9
BP	GO:0014911	positive regulation of smooth muscle cell migration	8/438	47/17913	1.6328e-05	0.000518032	0.000391953	9510/6352/9732/3479/1902/50507/8829/10631	8
BP	GO:0045778	positive regulation of ossification	11/438	94/17913	1.83611e-05	0.000578018	0.000437339	650/115908/56975/2697/3400/3479/182/4057/4488/860/6423	11
BP	GO:1903510	mucopolysaccharide metabolic process	12/438	112/17913	1.90706e-05	0.000590888	0.000447078	633/57214/337876/55790/1634/92126/3600/4060/4969/4958/10402/1462	12
BP	GO:0003205	cardiac chamber development	15/438	170/17913	1.92064e-05	0.000590888	0.000447078	9510/1301/1363/2627/182/4488/8829/55742/5125/6091/10512/6423/7168/7472/23414	15
BP	GO:0097529	myeloid leukocyte migration	15/438	170/17913	1.92064e-05	0.000590888	0.000447078	301/6352/729230/1524/6387/3576/1910/26585/3554/3672/64805/5919/6279/6280/7057	15
BP	GO:2001236	regulation of extrinsic apoptotic signaling pathway	14/438	151/17913	2.08058e-05	0.000631283	0.000477641	64798/2537/3479/3624/3685/8829/6423/6591/8406/6934/7057/7078/51330/10413	14
BP	GO:0050651	dermatan sulfate proteoglycan biosynthetic process	5/438	15/17913	2.09506e-05	0.000631283	0.000477641	633/55790/1634/92126/1462	5
BP	GO:0006026	aminoglycan catabolic process	9/438	63/17913	2.11412e-05	0.000631283	0.000477641	633/57214/1634/10082/4060/4969/4958/6383/1462	9
BP	GO:0045600	positive regulation of fat cell differentiation	9/438	63/17913	2.11412e-05	0.000631283	0.000477641	10974/650/83643/2487/5468/5743/5919/6423/6591	9
BP	GO:0097756	negative regulation of blood vessel diameter	10/438	79/17913	2.20135e-05	0.000652533	0.000493719	59/150/1311/9732/1909/1910/2149/2697/3357/5743	10
BP	GO:0071634	regulation of transforming growth factor beta production	7/438	36/17913	2.25088e-05	0.000662379	0.000501169	2627/3685/3696/55353/4060/5743/7057	7
BP	GO:0048863	stem cell differentiation	18/438	237/17913	2.27872e-05	0.000665746	0.000503717	1909/1910/2335/2348/2487/2627/26585/3357/182/4254/4488/8829/5156/860/10512/6591/7291/10413	18
BP	GO:0050880	regulation of blood vessel size	13/438	133/17913	2.33399e-05	0.000677025	0.00051225	59/150/1311/9732/1909/1910/2149/2697/2982/3357/3672/5592/5743	13
BP	GO:0030509	BMP signaling pathway	13/438	134/17913	2.52836e-05	0.000723074	0.000547092	650/91851/1311/2200/11167/26585/5654/4488/860/6423/6424/23213/23090	13
BP	GO:0035150	regulation of tube size	13/438	134/17913	2.52836e-05	0.000723074	0.000547092	59/150/1311/9732/1909/1910/2149/2697/2982/3357/3672/5592/5743	13
BP	GO:0035051	cardiocyte differentiation	14/438	154/17913	2.59644e-05	0.000732277	0.000554055	650/2348/8324/2627/26585/3479/182/4629/50507/5156/5999/10512/7291/7490	14
BP	GO:0010718	positive regulation of epithelial to mesenchymal transition	8/438	50/17913	2.61463e-05	0.000732277	0.000554055	650/182/10630/6934/7041/7291/25937/80139	8
BP	GO:1900047	negative regulation of hemostasis	8/438	50/17913	2.61463e-05	0.000732277	0.000554055	1311/2191/5156/5327/5592/5627/7035/7057	8
BP	GO:0060828	regulation of canonical Wnt signaling pathway	19/438	264/17913	2.87291e-05	0.000799103	0.000604617	80114/650/115908/51339/27122/2348/2487/8324/26585/3485/4163/6423/6424/6591/6934/79971/25937/10413/80139	19
BP	GO:0050655	dermatan sulfate proteoglycan metabolic process	5/438	16/17913	2.98629e-05	0.000823142	0.000622805	633/55790/1634/92126/1462	5
BP	GO:0090288	negative regulation of cellular response to growth factor stimulus	14/438	156/17913	2.99988e-05	0.000823142	0.000622805	54829/858/91851/10563/1634/2200/26585/5654/56937/6423/10253/23213/7041/7057	14
BP	GO:0045599	negative regulation of fat cell differentiation	8/438	51/17913	3.03555e-05	0.000827341	0.000625983	5167/3400/182/4488/6095/7041/25937/23414	8
BP	GO:0048738	cardiac muscle tissue development	17/438	221/17913	3.25846e-05	0.000877392	0.000663852	650/1301/8324/2627/2697/26585/3479/4629/50507/5156/5350/5999/7168/7472/7490/10413/23414	17
BP	GO:0071604	transforming growth factor beta production	7/438	38/17913	3.2624e-05	0.000877392	0.000663852	2627/3685/3696/55353/4060/5743/7057	7
BP	GO:0001649	osteoblast differentiation	17/438	222/17913	3.45089e-05	0.000921977	0.000697586	650/115908/56975/2697/26585/3400/3479/182/4015/4057/4488/860/6423/6591/7291/1462/25937	17
BP	GO:0007566	embryo implantation	8/438	52/17913	3.5117e-05	0.000931269	0.000704616	2013/2192/4313/5125/5740/5743/6696/7076	8
BP	GO:0043491	protein kinase B signaling	19/438	268/17913	3.53153e-05	0.000931269	0.000704616	8644/112464/6352/1524/2152/2252/29851/3479/3606/4254/9314/4015/50507/64805/5156/10253/6934/7057/50852	19
BP	GO:0002063	chondrocyte development	6/438	27/17913	3.95165e-05	0.00103533	0.000783352	1301/1311/4488/860/6423/23213	6
BP	GO:0050819	negative regulation of coagulation	8/438	53/17913	4.04866e-05	0.00105395	0.000797439	2191/5156/5327/5592/10544/5627/7035/7057	8
BP	GO:0014910	regulation of smooth muscle cell migration	10/438	85/17913	4.19708e-05	0.00108563	0.000821407	9510/6352/9732/3479/1902/50507/8829/10631/5592/7168	10
BP	GO:0051346	negative regulation of hydrolase activity	25/438	420/17913	4.23444e-05	0.00108836	0.000823473	3730/718/1266/1293/51232/1475/2537/3434/9314/4057/56925/51050/5350/94274/5627/5743/6423/6695/10253/7035/7980/7057/7076/7077/7078	25
BP	GO:0014812	muscle cell migration	11/438	103/17913	4.35705e-05	0.00111283	0.000841988	9510/6352/9732/3479/1902/50507/8829/55742/10631/5592/7168	11
BP	GO:0085029	extracellular matrix assembly	6/438	28/17913	4.92627e-05	0.00125035	0.000946038	84168/1278/10516/4015/4239/4629	6
BP	GO:0048608	reproductive structure development	25/438	426/17913	5.33047e-05	0.00134454	0.0010173	9510/8644/1634/2034/2627/2697/2706/5654/3400/3624/3696/4254/7026/5156/5468/5740/5743/84870/6423/6696/23213/7098/7472/7490/23414	25
BP	GO:0061458	reproductive system development	25/438	429/17913	5.96888e-05	0.00149627	0.00113211	9510/8644/1634/2034/2627/2697/2706/5654/3400/3624/3696/4254/7026/5156/5468/5740/5743/84870/6423/6696/23213/7098/7472/7490/23414	25
BP	GO:0006929	substrate-dependent cell migration	6/438	29/17913	6.0841e-05	0.00150656	0.00113989	2335/8829/64805/6091/6591/51330	6
BP	GO:0050650	chondroitin sulfate proteoglycan biosynthetic process	6/438	29/17913	6.0841e-05	0.00150656	0.00113989	633/337876/55790/54360/1634/1462	6
BP	GO:0030308	negative regulation of cell growth	14/438	167/17913	6.35937e-05	0.00156518	0.00118424	5167/2273/2487/2697/26585/3624/8829/5468/85004/5999/6423/23111/6696/7490	14
BP	GO:0050654	chondroitin sulfate proteoglycan metabolic process	7/438	42/17913	6.41044e-05	0.00156824	0.00118656	633/337876/55790/54360/1634/92126/1462	7
BP	GO:0033690	positive regulation of osteoblast proliferation	4/438	10/17913	6.58733e-05	0.00160187	0.001212	650/115908/3685/4057	4
BP	GO:0007596	blood coagulation	21/438	331/17913	7.05373e-05	0.00170507	0.00129009	150/1278/1281/1311/2149/2152/2191/2192/2627/3937/64805/5156/10630/5327/5592/10544/5627/7035/7980/7057/23414	21
BP	GO:0090090	negative regulation of canonical Wnt signaling pathway	14/438	169/17913	7.23703e-05	0.00173903	0.00131578	80114/650/115908/51339/27122/2487/26585/3485/4163/6423/6424/6591/6934/25937	14
BP	GO:0097191	extrinsic apoptotic signaling pathway	16/438	213/17913	7.34082e-05	0.00175359	0.0013268	64798/2537/3479/3624/3685/4254/8829/6423/6591/8406/6934/7057/7078/7098/51330/10413	16
BP	GO:0002544	chronic inflammatory response	5/438	19/17913	7.48192e-05	0.00177685	0.0013444	6352/10563/2697/6279/7057	5
BP	GO:0016202	regulation of striated muscle tissue development	13/438	149/17913	7.68034e-05	0.00181336	0.00137203	650/8324/2627/2697/26585/3479/4015/5999/6285/7291/7472/10413/23414	13
BP	GO:0060541	respiratory system development	15/438	193/17913	8.36143e-05	0.00196276	0.00148506	9509/220/83716/1522/2034/2252/2627/4015/5156/10630/10253/7472/7490/10413/23414	15
BP	GO:0007599	hemostasis	21/438	336/17913	8.72552e-05	0.00203646	0.00154082	150/1278/1281/1311/2149/2152/2191/2192/2627/3937/64805/5156/10630/5327/5592/10544/5627/7035/7980/7057/23414	21
BP	GO:0001890	placenta development	13/438	151/17913	8.80492e-05	0.00204324	0.00154596	1634/2034/2697/2706/5654/3696/7026/5468/5740/5743/84870/6696/7472	13
BP	GO:0031099	regeneration	15/438	194/17913	8.86352e-05	0.00204493	0.00154723	306/6387/2348/8324/2697/3479/9314/4147/4837/10631/5468/5396/5738/6696/10413	15
BP	GO:0090303	positive regulation of wound healing	8/438	59/17913	8.91288e-05	0.00204493	0.00154723	150/301/2149/2152/4638/10630/64094/7057	8
BP	GO:0050817	coagulation	21/438	337/17913	9.09928e-05	0.00207596	0.00157071	150/1278/1281/1311/2149/2152/2191/2192/2627/3937/64805/5156/10630/5327/5592/10544/5627/7035/7980/7057/23414	21
BP	GO:0030323	respiratory tube development	14/438	173/17913	9.31363e-05	0.00210126	0.00158985	9509/83716/1522/2034/2252/2627/4015/5125/5156/10630/10253/7472/10413/23414	14
BP	GO:0051897	positive regulation of protein kinase B signaling	14/438	173/17913	9.31363e-05	0.00210126	0.00158985	8644/1524/2152/2252/29851/3606/4254/50507/64805/5156/10253/6934/7057/50852	14
BP	GO:1901861	regulation of muscle tissue development	13/438	152/17913	9.41876e-05	0.00211324	0.00159892	650/8324/2627/2697/26585/3479/4015/5999/6285/7291/7472/10413/23414	13
BP	GO:0090066	regulation of anatomical structure size	25/438	442/17913	9.60291e-05	0.00214272	0.00162122	59/150/1311/6387/64798/9732/1909/1910/2059/2149/2335/2697/2982/3357/3575/3672/10787/8829/5592/51334/5743/51429/23111/6696/51330	25
BP	GO:0033630	positive regulation of cell adhesion mediated by integrin	5/438	20/17913	9.77645e-05	0.00216952	0.0016415	8754/6352/10563/64805/6423	5
BP	GO:0007229	integrin-mediated signaling pathway	10/438	94/17913	9.97621e-05	0.00219289	0.00165919	8754/9510/1281/2013/10979/3672/3685/3693/8829/7076	10
BP	GO:0048634	regulation of muscle organ development	13/438	153/17913	0.000100693	0.00219289	0.00165919	650/8324/2627/2697/26585/3479/4015/5999/6285/7291/7472/10413/23414	13
BP	GO:0032908	regulation of transforming growth factor beta1 production	4/438	11/17913	0.000101518	0.00219289	0.00165919	2627/55353/4060/7057	4
BP	GO:0061307	cardiac neural crest cell differentiation involved in heart development	4/438	11/17913	0.000101518	0.00219289	0.00165919	2348/182/10512/7291	4
BP	GO:0061308	cardiac neural crest cell development involved in heart development	4/438	11/17913	0.000101518	0.00219289	0.00165919	2348/182/10512/7291	4
BP	GO:0030178	negative regulation of Wnt signaling pathway	15/438	198/17913	0.000111448	0.00239465	0.00181184	147495/80114/650/115908/51339/27122/2487/26585/3485/4163/6423/6424/6591/6934/25937	15
BP	GO:0071229	cellular response to acid chemical	15/438	199/17913	0.000117893	0.0025074	0.00189715	8644/1278/1281/1290/2042/2348/8324/9314/4313/56034/5156/55022/5468/7472/10413	15
BP	GO:0022617	extracellular matrix disassembly	9/438	78/17913	0.00011793	0.0025074	0.00189715	11096/1513/2191/5654/4312/4313/10630/7076/7077	9
BP	GO:0017015	regulation of transforming growth factor beta receptor signaling pathway	11/438	115/17913	0.000119626	0.00253021	0.00191441	54829/858/27122/2200/2348/5654/4015/56937/7041/7057/80139	11
BP	GO:0010632	regulation of epithelial cell migration	19/438	294/17913	0.000121706	0.00256088	0.00193761	8754/301/306/10563/1634/1942/2013/2252/9314/4163/4223/7026/8829/10769/5468/5743/64094/27286/7057	19
BP	GO:0150063	visual system development	21/438	346/17913	0.000131579	0.00275435	0.00208399	220/718/91851/1289/1290/1295/1545/2202/2200/2697/3624/182/9314/4237/8829/64805/5156/23554/7291/7472/7490	21
BP	GO:0035265	organ growth	14/438	179/17913	0.000133951	0.00278962	0.00211068	1311/2121/2252/2627/2697/3479/4488/57502/5999/10253/7472/7490/10413/23414	14
BP	GO:1903844	regulation of cellular response to transforming growth factor beta stimulus	11/438	117/17913	0.000139651	0.00289348	0.00218926	54829/858/27122/2200/2348/5654/4015/56937/7041/7057/80139	11
BP	GO:0110110	positive regulation of animal organ morphogenesis	9/438	80/17913	0.000143654	0.00296131	0.00224058	650/2252/26585/182/6091/10512/7291/7472/7490	9
BP	GO:0030208	dermatan sulfate biosynthetic process	4/438	12/17913	0.000149341	0.00304096	0.00230085	633/1634/92126/1462	4
BP	GO:0032905	transforming growth factor beta1 production	4/438	12/17913	0.000149341	0.00304096	0.00230085	2627/55353/4060/7057	4
BP	GO:0090596	sensory organ morphogenesis	17/438	250/17913	0.000149764	0.00304096	0.00230085	220/1301/1289/1290/1295/115908/2202/2200/2487/182/121227/4237/5396/10253/23554/7291/7472	17
BP	GO:0010574	regulation of vascular endothelial growth factor production	6/438	34/17913	0.000155338	0.0031229	0.00236285	718/729230/1545/5743/6095/23213	6
BP	GO:2000403	positive regulation of lymphocyte migration	6/438	34/17913	0.000155338	0.0031229	0.00236285	6364/6352/729230/6387/10563/9547	6
BP	GO:0030510	regulation of BMP signaling pathway	9/438	81/17913	0.000158175	0.00316428	0.00239416	91851/2200/26585/5654/4488/6423/6424/23213/23090	9
BP	GO:0033622	integrin activation	5/438	22/17913	0.000159488	0.00317491	0.0024022	6387/10563/10979/2335/64805	5
BP	GO:0048880	sensory system development	21/438	351/17913	0.000160449	0.00317846	0.00240489	220/718/91851/1289/1290/1295/1545/2202/2200/2697/3624/182/9314/4237/8829/64805/5156/23554/7291/7472/7490	21
BP	GO:0048562	embryonic organ morphogenesis	18/438	276/17913	0.000163006	0.00321344	0.00243135	220/1301/115908/2202/1942/2200/2348/2487/2697/121227/4237/9645/5156/5396/860/10253/7291/10413	18
BP	GO:0003018	vascular process in circulatory system	13/438	161/17913	0.000168245	0.00330068	0.00249736	59/150/1311/9732/1909/1910/2149/2697/2982/3357/3672/5592/5743	13
BP	GO:0030195	negative regulation of blood coagulation	7/438	49/17913	0.000176176	0.00343968	0.00260253	2191/5156/5327/5592/5627/7035/7057	7
BP	GO:0035924	cellular response to vascular endothelial growth factor stimulus	8/438	65/17913	0.000178551	0.00346935	0.00262498	301/1634/2619/8829/5156/6091/64094/10253	8
BP	GO:0002042	cell migration involved in sprouting angiogenesis	10/438	101/17913	0.000182173	0.00350619	0.00265285	301/26585/9314/4223/8829/10769/5743/6091/27286/7057	10
BP	GO:0055024	regulation of cardiac muscle tissue development	10/438	101/17913	0.000182173	0.00350619	0.00265285	650/8324/2627/2697/26585/3479/5999/7472/10413/23414	10
BP	GO:0001893	maternal placenta development	6/438	35/17913	0.000183645	0.00351784	0.00266167	2697/2706/7026/5740/5743/6696	6
BP	GO:0010594	regulation of endothelial cell migration	16/438	231/17913	0.000188755	0.00359468	0.00271981	301/306/10563/1634/1942/2013/9314/4223/7026/8829/10769/5468/5743/64094/27286/7057	16
BP	GO:0048839	inner ear development	14/438	185/17913	0.000189427	0.00359468	0.00271981	220/650/1301/115908/9547/54360/2487/2706/182/8825/121227/4094/5396/10253	14
BP	GO:0003073	regulation of systemic arterial blood pressure	9/438	83/17913	0.000190907	0.00360592	0.00272831	1066/1522/2013/2149/2697/7026/5125/10631/7168	9
BP	GO:0061035	regulation of cartilage development	8/438	66/17913	0.000198904	0.00373687	0.00282739	650/1513/2202/2487/26585/4094/860/6591	8
BP	GO:0060445	branching involved in salivary gland morphogenesis	5/438	23/17913	0.000199723	0.00373687	0.00282739	2252/8829/59277/10512/6591	5
BP	GO:1905517	macrophage migration	7/438	50/17913	0.0002006	0.00373687	0.00282739	6352/729230/1524/1910/64805/5919/7057	7
BP	GO:0055123	digestive system development	12/438	143/17913	0.000207792	0.00385316	0.00291538	79827/1281/3576/51339/1910/2627/5125/56034/5156/5919/6423/79971	12
BP	GO:0030205	dermatan sulfate metabolic process	4/438	13/17913	0.000211559	0.00390336	0.00295336	633/1634/92126/1462	4
BP	GO:0061564	axon development	24/438	438/17913	0.000212421	0.00390336	0.00295336	104/3730/1009/1123/152330/6387/9201/1942/55740/2042/2335/2348/9314/4147/8829/59277/65059/6091/6285/10512/23111/6696/51330/10100	24
BP	GO:0010573	vascular endothelial growth factor production	6/438	36/17913	0.000215872	0.0039312	0.00297442	718/729230/1545/5743/6095/23213	6
BP	GO:0048009	insulin-like growth factor receptor signaling pathway	6/438	36/17913	0.000215872	0.0039312	0.00297442	650/8483/51232/2690/3479/3485	6
BP	GO:0016049	cell growth	25/438	466/17913	0.000217811	0.0039488	0.00298774	6387/9201/5167/10516/2273/2335/2487/2697/26585/3479/3624/8829/10631/5468/65059/85004/5999/6279/6280/6423/23111/6695/6696/51330/7490	25
BP	GO:0030595	leukocyte chemotaxis	14/438	188/17913	0.00022392	0.00404151	0.00305788	301/6352/729230/6387/10563/9547/3576/1910/26585/3672/5919/6279/6280/7057	14
BP	GO:0043583	ear development	15/438	212/17913	0.000236332	0.00424665	0.0032131	220/650/1301/115908/9547/54360/2487/2706/182/8825/121227/4094/5396/10253/7291	15
BP	GO:0046697	decidualization	5/438	24/17913	0.00024725	0.00442327	0.00334674	2697/2706/5740/5743/6696	5
BP	GO:0030574	collagen catabolic process	6/438	37/17913	0.000252393	0.00447585	0.00338651	9509/1306/1513/2191/4312/4313	6
BP	GO:0034405	response to fluid shear stress	6/438	37/17913	0.000252393	0.00447585	0.00338651	8754/760/2697/9314/5743/7980	6
BP	GO:0030324	lung development	13/438	169/17913	0.000271567	0.00478564	0.00362091	9509/83716/1522/2034/2252/2627/4015/5156/10630/10253/7472/10413/23414	13
BP	GO:0051146	striated muscle cell differentiation	17/438	263/17913	0.000273121	0.00478564	0.00362091	8038/650/858/1311/8324/2627/26585/3479/4015/4629/50507/5156/5738/5999/85461/7168/7490	17
BP	GO:1903035	negative regulation of response to wounding	9/438	87/17913	0.000273398	0.00478564	0.00362091	2191/2697/5156/5327/5592/5627/6696/7035/7057	9
BP	GO:0070371	ERK1 and ERK2 cascade	18/438	289/17913	0.000286777	0.00499236	0.00377732	57007/650/112464/1848/2149/2192/2335/2633/3357/3479/3685/9314/50507/8829/5156/6504/10253/7078	18
BP	GO:0001936	regulation of endothelial cell proliferation	13/438	170/17913	0.000287666	0.00499236	0.00377732	650/858/1012/6387/2152/2697/3357/7026/8829/5468/23213/7057/7472	13
BP	GO:0046068	cGMP metabolic process	4/438	14/17913	0.000290482	0.0049985	0.00378196	2982/2983/5136/6095	4
BP	GO:0048569	post-embryonic animal organ development	4/438	14/17913	0.000290482	0.0049985	0.00378196	2202/2200/9314/4237	4
BP	GO:0007565	female pregnancy	14/438	193/17913	0.000293448	0.00502823	0.00380446	2013/1833/2192/2353/2697/2706/3485/4313/7026/5125/5740/5743/6696/7076	14
BP	GO:0014829	vascular smooth muscle contraction	5/438	25/17913	0.000302902	0.0051468	0.00389417	59/1311/9732/1909/1910	5
BP	GO:0045932	negative regulation of muscle contraction	5/438	25/17913	0.000302902	0.0051468	0.00389417	10203/9732/2982/5592/5743	5
BP	GO:0051896	regulation of protein kinase B signaling	16/438	241/17913	0.000304693	0.00515566	0.00390087	8644/112464/1524/2152/2252/29851/3606/4254/9314/50507/64805/5156/10253/6934/7057/50852	16
BP	GO:0001558	regulation of cell growth	22/438	396/17913	0.00031973	0.00538765	0.0040764	6387/5167/10516/2273/2335/2487/2697/26585/3479/3624/8829/5468/85004/5999/6279/6280/6423/23111/6695/6696/51330/7490	22
BP	GO:0001659	temperature homeostasis	13/438	172/17913	0.00032232	0.00540885	0.00409244	11096/729230/1910/2034/2167/2697/3600/3606/3910/4237/56034/5743/23090	13
BP	GO:0050727	regulation of inflammatory response	25/438	479/17913	0.000329539	0.00550723	0.00416688	301/718/10203/6352/729230/3075/3426/1910/2167/3479/3600/3606/3554/9314/4907/5468/5627/5740/5743/6095/6279/6280/6401/7098/7130	25
BP	GO:1903036	positive regulation of response to wounding	8/438	71/17913	0.00033131	0.00551413	0.0041721	150/301/2149/2152/4638/10630/64094/7057	8
BP	GO:0030204	chondroitin sulfate metabolic process	6/438	39/17913	0.000339903	0.00563407	0.00426285	633/337876/55790/1634/92126/1462	6
BP	GO:0010811	positive regulation of cell-substrate adhesion	10/438	110/17913	0.000366052	0.0059467	0.00449939	25890/151887/1012/1295/10085/25975/2013/2335/8829/64094	10
BP	GO:0032496	response to lipopolysaccharide	18/438	295/17913	0.000367324	0.0059467	0.00449939	8754/6352/1524/3576/1634/1910/2149/2353/2697/2706/55970/3606/4057/57088/5743/6279/6401/7035	18
BP	GO:0019934	cGMP-mediated signaling	5/438	26/17913	0.000367551	0.0059467	0.00449939	1910/2983/3357/5592/7057	5
BP	GO:0030206	chondroitin sulfate biosynthetic process	5/438	26/17913	0.000367551	0.0059467	0.00449939	633/337876/55790/1634/1462	5
BP	GO:0045992	negative regulation of embryonic development	5/438	26/17913	0.000367551	0.0059467	0.00449939	1289/1290/8324/6423/23213	5
BP	GO:0061037	negative regulation of cartilage development	5/438	26/17913	0.000367551	0.0059467	0.00449939	1513/2202/2487/26585/6591	5
BP	GO:0007162	negative regulation of cell adhesion	17/438	271/17913	0.000386653	0.00616277	0.00466287	301/650/1012/6387/1545/2192/8324/2633/182/9314/10631/5592/6591/6695/7045/7057/80139	17
BP	GO:0050768	negative regulation of neurogenesis	17/438	271/17913	0.000386653	0.00616277	0.00466287	152330/1281/1522/85458/1809/1910/1942/3400/182/1902/8829/10769/5376/23111/6695/6696/26022	17
BP	GO:0034356	NAD biosynthesis via nicotinamide riboside salvage pathway	4/438	15/17913	0.000388493	0.00616277	0.00466287	4837/83594/5740/5743	4
BP	GO:0043931	ossification involved in bone maturation	4/438	15/17913	0.000388493	0.00616277	0.00466287	650/26585/3479/4057	4
BP	GO:0051044	positive regulation of membrane protein ectodomain proteolysis	4/438	15/17913	0.000388493	0.00616277	0.00466287	8754/150/152503/51429	4
BP	GO:0006509	membrane protein ectodomain proteolysis	6/438	40/17913	0.000391732	0.00616599	0.00466531	8754/150/152503/51429/7076/7078	6
BP	GO:0038084	vascular endothelial growth factor signaling pathway	6/438	40/17913	0.000391732	0.00616599	0.00466531	1634/8829/5156/6091/64094/10253	6
BP	GO:0061045	negative regulation of wound healing	8/438	73/17913	0.000401201	0.00627779	0.0047499	2191/2697/5156/5327/5592/5627/7035/7057	8
BP	GO:0048565	digestive tract development	11/438	132/17913	0.000401927	0.00627779	0.0047499	79827/1281/3576/51339/1910/2627/5125/56034/5156/5919/6423	11
BP	GO:0031960	response to corticosteroid	12/438	155/17913	0.000436525	0.00676614	0.00511939	8754/8644/301/114907/387758/2353/2706/3176/3485/687/5743/6285	12
BP	GO:0071695	anatomical structure maturation	12/438	155/17913	0.000436525	0.00676614	0.00511939	650/718/1524/1910/56975/2697/26585/3479/4057/4313/4488/59277	12
BP	GO:0045665	negative regulation of neuron differentiation	14/438	201/17913	0.000443077	0.00684158	0.00517648	152330/1522/85458/1809/1910/1942/182/1902/8829/10769/5376/23111/6695/6696	14
BP	GO:0010518	positive regulation of phospholipase activity	7/438	57/17913	0.000458495	0.00705284	0.00533631	6352/1909/3357/1902/64805/5156/6401	7
BP	GO:0034330	cell junction organization	17/438	277/17913	0.00049667	0.00761123	0.0057588	1009/1012/2042/2149/10979/2335/2697/2706/26585/22998/57502/8829/5796/6591/7057/7082/80139	17
BP	GO:0035025	positive regulation of Rho protein signal transduction	4/438	16/17913	0.000508036	0.00775615	0.00586845	1281/2149/1902/6091	4
BP	GO:0010863	positive regulation of phospholipase C activity	6/438	42/17913	0.000513772	0.00778754	0.0058922	1909/3357/1902/64805/5156/6401	6
BP	GO:0048705	skeletal system morphogenesis	14/438	204/17913	0.000513927	0.00778754	0.0058922	1301/1311/55790/26585/4057/4256/4313/4488/5156/5396/860/6423/6424/7291	14
BP	GO:0001101	response to acid chemical	19/438	330/17913	0.000522923	0.00782698	0.00592205	8644/1278/1281/1290/2042/2348/8324/2697/2706/3485/9314/4313/56034/5156/55022/5468/5743/7472/10413	19
BP	GO:0002040	sprouting angiogenesis	13/438	181/17913	0.00052573	0.00782698	0.00592205	301/1012/26585/9314/4223/8829/55742/10769/5743/6091/84870/27286/7057	13
BP	GO:0003180	aortic valve morphogenesis	5/438	28/17913	0.000527504	0.00782698	0.00592205	1942/182/6091/6591/7291	5
BP	GO:0033688	regulation of osteoblast proliferation	5/438	28/17913	0.000527504	0.00782698	0.00592205	650/115908/26585/3685/4057	5
BP	GO:2000406	positive regulation of T cell migration	5/438	28/17913	0.000527504	0.00782698	0.00592205	6364/6352/729230/6387/10563	5
BP	GO:0060415	muscle tissue morphogenesis	8/438	76/17913	0.000528095	0.00782698	0.00592205	104/650/1301/1281/4638/7168/7472/23414	8
BP	GO:0043534	blood vessel endothelial cell migration	13/438	182/17913	0.000553893	0.00817948	0.00618876	301/1942/2013/26585/9314/4223/8829/10769/5468/5743/6091/27286/7057	13
BP	GO:0060411	cardiac septum morphogenesis	8/438	77/17913	0.000576965	0.00848933	0.00642319	2627/182/4488/8829/55742/6091/10512/23414	8
BP	GO:0043616	keratinocyte proliferation	6/438	43/17913	0.000584928	0.00856636	0.00648147	1012/2252/687/5796/6591/10413	6
BP	GO:0044344	cellular response to fibroblast growth factor stimulus	11/438	138/17913	0.000586419	0.00856636	0.00648147	3730/6352/10563/3576/56975/2252/10631/860/64094/23213/7057	11
BP	GO:0043410	positive regulation of MAPK cascade	25/438	499/17913	0.00060031	0.00873784	0.00661122	57007/8754/150/650/858/112464/1848/1942/2149/8324/2690/3357/3479/3672/4254/1902/50507/8829/5156/6091/6504/10253/7057/7077/7098	25
BP	GO:0001933	negative regulation of protein phosphorylation	22/438	416/17913	0.000622	0.00896272	0.00678137	104/51339/64798/1848/1942/5167/2167/2192/2633/26585/9314/2122/7026/55022/56937/5783/5999/6423/10253/7078/7291/25937	22
BP	GO:0051384	response to glucocorticoid	11/438	139/17913	0.000623141	0.00896272	0.00678137	8754/301/114907/387758/2353/2706/3176/3485/687/5743/6285	11
BP	GO:0010575	positive regulation of vascular endothelial growth factor production	5/438	29/17913	0.000624725	0.00896272	0.00678137	718/1545/5743/6095/23213	5
BP	GO:0006940	regulation of smooth muscle contraction	7/438	60/17913	0.000629002	0.00896272	0.00678137	150/10203/9732/2149/2982/5592/5743	7
BP	GO:1990868	response to chemokine	7/438	60/17913	0.000629002	0.00896272	0.00678137	57007/6352/729230/1524/6387/4015/6091	7
BP	GO:1990869	cellular response to chemokine	7/438	60/17913	0.000629002	0.00896272	0.00678137	57007/6352/729230/1524/6387/4015/6091	7
BP	GO:0002237	response to molecule of bacterial origin	18/438	309/17913	0.000635165	0.00901889	0.00682387	8754/6352/1524/3576/1634/1910/2149/2353/2697/2706/55970/3606/4057/57088/5743/6279/6401/7035	18
BP	GO:0001935	endothelial cell proliferation	13/438	185/17913	0.000646153	0.00914295	0.00691773	650/858/1012/6387/2152/2697/3357/7026/8829/5468/23213/7057/7472	13
BP	GO:0035850	epithelial cell differentiation involved in kidney development	6/438	44/17913	0.000663501	0.00932345	0.00705431	59/26585/182/7490/25937/10413	6
BP	GO:1900274	regulation of phospholipase C activity	6/438	44/17913	0.000663501	0.00932345	0.00705431	1909/3357/1902/64805/5156/6401	6
BP	GO:0050680	negative regulation of epithelial cell proliferation	12/438	163/17913	0.000685464	0.00959885	0.00726268	858/2697/687/4163/7026/5468/5796/6091/6423/6591/23213/7057	12
BP	GO:0007202	activation of phospholipase C activity	5/438	30/17913	0.000734772	0.010254	0.00775836	1909/3357/1902/64805/6401	5
BP	GO:0001974	blood vessel remodeling	6/438	45/17913	0.000750004	0.0103597	0.00783839	633/729230/2034/182/84870/10512	6
BP	GO:0003197	endocardial cushion development	6/438	45/17913	0.000750004	0.0103597	0.00783839	650/182/4488/6091/6591/7291	6
BP	GO:0071675	regulation of mononuclear cell migration	6/438	45/17913	0.000750004	0.0103597	0.00783839	6352/729230/6387/26585/5919/7057	6
BP	GO:0021700	developmental maturation	16/438	262/17913	0.000759516	0.0104556	0.00791089	650/718/1524/1910/2034/56975/2697/26585/3479/3600/4057/4313/4488/59277/5468/860	16
BP	GO:0060840	artery development	9/438	100/17913	0.000767547	0.0104598	0.00791405	1281/1311/2348/182/4015/4638/8829/5396/6091	9
BP	GO:0097530	granulocyte migration	9/438	100/17913	0.000767547	0.0104598	0.00791405	301/6352/3576/3554/3672/5919/6279/6280/7057	9
BP	GO:2001237	negative regulation of extrinsic apoptotic signaling pathway	9/438	100/17913	0.000767547	0.0104598	0.00791405	2537/3479/3685/8829/6423/6591/6934/7057/10413	9
BP	GO:0055007	cardiac muscle cell differentiation	10/438	121/17913	0.000778933	0.0105442	0.00797792	650/8324/2627/26585/3479/4629/50507/5156/5999/7490	10
BP	GO:0090101	negative regulation of transmembrane receptor protein serine/threonine kinase signaling pathway	10/438	121/17913	0.000778933	0.0105442	0.00797792	54829/858/91851/8483/2200/26585/5654/56937/6423/7041	10
BP	GO:0106106	cold-induced thermogenesis	11/438	143/17913	0.000789753	0.0106198	0.00803516	11096/729230/2034/2167/2697/3600/3606/3910/4237/56034/23090	11
BP	GO:0120161	regulation of cold-induced thermogenesis	11/438	143/17913	0.000789753	0.0106198	0.00803516	11096/729230/2034/2167/2697/3600/3606/3910/4237/56034/23090	11
BP	GO:0001654	eye development	19/438	342/17913	0.000804091	0.0107769	0.00815404	220/91851/1289/1290/1295/1545/2202/2200/2697/3624/182/9314/4237/8829/5156/23554/7291/7472/7490	19
BP	GO:0002690	positive regulation of leukocyte chemotaxis	8/438	81/17913	0.000810301	0.010789	0.00816314	6352/729230/6387/10563/9547/3576/5919/7057	8
BP	GO:0046849	bone remodeling	8/438	81/17913	0.000810301	0.010789	0.00816314	760/115908/1513/2697/26585/50507/10609/4982	8
BP	GO:0070977	bone maturation	4/438	18/17913	0.000821697	0.0108752	0.00822838	650/26585/3479/4057	4
BP	GO:0019233	sensory perception of pain	9/438	101/17913	0.000824812	0.0108752	0.00822838	55107/729230/6387/1910/2149/56925/4886/5743/54463	9
BP	GO:0048661	positive regulation of smooth muscle cell proliferation	9/438	101/17913	0.000824812	0.0108752	0.00822838	9510/10203/6352/1012/3479/3606/4313/5743/7057	9
BP	GO:0051961	negative regulation of nervous system development	17/438	290/17913	0.000830583	0.0109158	0.00825914	152330/1281/1522/85458/1809/1910/1942/3400/182/1902/8829/10769/5376/23111/6695/6696/26022	17
BP	GO:0061614	pri-miRNA transcription by RNA polymerase II	6/438	46/17913	0.000844967	0.0110691	0.00837507	650/2353/9314/5468/7003/7490	6
BP	GO:0033687	osteoblast proliferation	5/438	31/17913	0.000858674	0.0112125	0.00848357	650/115908/26585/3685/4057	5
BP	GO:0042445	hormone metabolic process	14/438	215/17913	0.000861992	0.0112197	0.00848905	8644/220/650/1066/1522/1545/27122/2690/5122/5125/5156/140606/6696/6934	14
BP	GO:1901654	response to ketone	13/438	191/17913	0.00086992	0.0112779	0.0085331	8644/114907/387758/2353/2706/2770/9314/687/5350/5468/6696/7057/10413	13
BP	GO:0042326	negative regulation of phosphorylation	23/438	455/17913	0.000872019	0.0112779	0.0085331	104/51339/64798/1848/1942/5167/2167/2192/2633/26585/3624/9314/2122/7026/55022/56937/5783/5999/6423/10253/7078/7291/25937	23
BP	GO:0048644	muscle organ morphogenesis	8/438	82/17913	0.000879102	0.0113334	0.0085751	104/650/1301/1281/4638/7168/7472/23414	8
BP	GO:0048592	eye morphogenesis	11/438	145/17913	0.000885996	0.0113503	0.00858782	220/1289/1290/1295/2202/2200/182/4237/23554/7291/7472	11
BP	GO:0071774	response to fibroblast growth factor	11/438	145/17913	0.000885996	0.0113503	0.00858782	3730/6352/10563/3576/56975/2252/10631/860/64094/23213/7057	11
BP	GO:0019915	lipid storage	7/438	64/17913	0.000930614	0.0118843	0.00899193	718/1407/5167/3685/4481/5468/158219	7
BP	GO:0048754	branching morphogenesis of an epithelial tube	11/438	146/17913	0.000937642	0.0119366	0.00903144	650/1522/1909/26585/4488/8829/6423/10253/7472/7490/10413	11
BP	GO:0032526	response to retinoic acid	9/438	103/17913	0.000949777	0.0120533	0.00911973	2042/8324/2697/2706/3485/9314/5468/7472/10413	9
BP	GO:0022604	regulation of cell morphogenesis	22/438	430/17913	0.000959886	0.0121436	0.00918809	301/1123/6387/1942/2059/2192/10979/2335/2633/1902/8829/55742/10630/10631/6091/6285/6383/152503/23111/6696/51330/7168	22
BP	GO:0003176	aortic valve development	5/438	32/17913	0.000997487	0.0125025	0.0094596	1942/182/6091/6591/7291	5
BP	GO:0040036	regulation of fibroblast growth factor receptor signaling pathway	5/438	32/17913	0.000997487	0.0125025	0.0094596	56975/860/64094/23213/7057	5
BP	GO:0071295	cellular response to vitamin	5/438	32/17913	0.000997487	0.0125025	0.0094596	2348/3600/10631/5468/6591	5
BP	GO:0071902	positive regulation of protein serine/threonine kinase activity	18/438	322/17913	0.00102003	0.012601	0.00953416	8754/150/650/57214/1848/2149/2690/3357/3479/3672/4254/1902/4057/50507/6091/10253/56892/7057	18
BP	GO:0001991	regulation of systemic arterial blood pressure by circulatory renin-angiotensin	4/438	19/17913	0.00102086	0.012601	0.00953416	1066/1522/2149/5125	4
BP	GO:0002827	positive regulation of T-helper 1 type immune response	4/438	19/17913	0.00102086	0.012601	0.00953416	301/729230/3606/3554	4
BP	GO:0060973	cell migration involved in heart development	4/438	19/17913	0.00102086	0.012601	0.00953416	2348/10512/6591/7291	4
BP	GO:0140131	positive regulation of lymphocyte chemotaxis	4/438	19/17913	0.00102086	0.012601	0.00953416	6352/729230/10563/9547	4
BP	GO:0045926	negative regulation of growth	15/438	244/17913	0.00102789	0.012608	0.00953945	5167/2273/2487/2697/26585/3624/4499/8829/5468/85004/5999/6423/23111/6696/7490	15
BP	GO:0060420	regulation of heart growth	8/438	84/17913	0.00103074	0.012608	0.00953945	2627/2697/3479/5999/7472/7490/10413/23414	8
BP	GO:0071621	granulocyte chemotaxis	8/438	84/17913	0.00103074	0.012608	0.00953945	301/6352/3576/3672/5919/6279/6280/7057	8
BP	GO:0044273	sulfur compound catabolic process	6/438	48/17913	0.00106247	0.012957	0.0098035	633/1634/4060/4969/4958/1462	6
BP	GO:0070372	regulation of ERK1 and ERK2 cascade	16/438	271/17913	0.00108562	0.0131997	0.00998714	57007/650/112464/1848/2149/2192/2335/2633/3357/9314/50507/8829/5156/6504/10253/7078	16
BP	GO:0002688	regulation of leukocyte chemotaxis	9/438	105/17913	0.00108968	0.0132095	0.00999459	6352/729230/6387/10563/9547/3576/26585/5919/7057	9
BP	GO:0042475	odontogenesis of dentin-containing tooth	8/438	85/17913	0.00111403	0.013365	0.0101122	650/760/56975/5654/4488/5156/860/4982	8
BP	GO:0090049	regulation of cell migration involved in sprouting angiogenesis	8/438	85/17913	0.00111403	0.013365	0.0101122	301/9314/4223/8829/10769/5743/27286/7057	8
BP	GO:0021537	telencephalon development	15/438	246/17913	0.00111575	0.013365	0.0101122	220/306/650/22903/1281/6387/85458/55970/3400/3624/3912/1902/8829/64805/6091	15
BP	GO:0010517	regulation of phospholipase activity	7/438	66/17913	0.00111896	0.013365	0.0101122	6352/1909/3357/1902/64805/5156/6401	7
BP	GO:1905207	regulation of cardiocyte differentiation	7/438	66/17913	0.00111896	0.013365	0.0101122	650/8324/2627/26585/3479/5999/10512	7
BP	GO:0010837	regulation of keratinocyte proliferation	5/438	33/17913	0.00115229	0.0136826	0.0103525	2252/687/5796/6591/10413	5
BP	GO:0048048	embryonic eye morphogenesis	5/438	33/17913	0.00115229	0.0136826	0.0103525	220/2202/2200/4237/7291	5
BP	GO:0007264	small GTPase mediated signal transduction	23/438	465/17913	0.00116379	0.0137788	0.0104253	150/79822/1012/1123/1278/1281/91614/9732/2059/2149/3479/4254/1902/10787/8829/10630/10769/23362/85004/9886/54453/6091/7077	23
BP	GO:0035272	exocrine system development	6/438	49/17913	0.00118613	0.0140026	0.0105946	2252/8829/59277/10512/6591/79971	6
BP	GO:0032602	chemokine production	8/438	86/17913	0.00120261	0.0141559	0.0107106	3606/9314/10631/6279/6280/6591/7098/7291	8
BP	GO:0010812	negative regulation of cell-substrate adhesion	7/438	67/17913	0.00122371	0.0143627	0.0108671	2192/8324/2633/182/10631/6695/7057	7
BP	GO:0006875	cellular metal ion homeostasis	23/438	467/17913	0.00123129	0.01441	0.0109029	781/6352/6355/729230/57214/1193/6387/10563/79901/1909/1910/2149/2697/9843/3357/3685/1902/4057/5156/5350/6279/6280/286133	23
BP	GO:1905523	positive regulation of macrophage migration	4/438	20/17913	0.00125164	0.014606	0.0110512	6352/64805/5919/7057	4
BP	GO:0001764	neuron migration	11/438	152/17913	0.00130248	0.0151124	0.0114344	1281/6387/9201/2697/29967/4147/7026/8829/5592/6695/7291	11
BP	GO:1990845	adaptive thermogenesis	11/438	152/17913	0.00130248	0.0151124	0.0114344	11096/729230/2034/2167/2697/3600/3606/3910/4237/56034/23090	11
BP	GO:0099024	plasma membrane invagination	6/438	50/17913	0.00132053	0.0151537	0.0114656	718/51454/4481/5468/51429/7057	6
BP	GO:0007435	salivary gland morphogenesis	5/438	34/17913	0.00132418	0.0151537	0.0114656	2252/8829/59277/10512/6591	5
BP	GO:0009612	response to mechanical stimulus	13/438	200/17913	0.00132511	0.0151537	0.0114656	1301/1281/6387/1634/2353/2697/3485/10631/5468/5743/7057/7098/441027	13
BP	GO:0044706	multi-multicellular organism process	14/438	225/17913	0.00133367	0.0151537	0.0114656	2013/1833/2192/2353/2697/2706/3485/4313/7026/5125/5740/5743/6696/7076	14
BP	GO:0071674	mononuclear cell migration	7/438	68/17913	0.00133598	0.0151537	0.0114656	301/6352/729230/6387/26585/5919/7057	7
BP	GO:0048736	appendage development	12/438	176/17913	0.00133807	0.0151537	0.0114656	1311/2697/26585/4223/4488/7026/5125/5396/860/10512/6423/7291	12
BP	GO:0060173	limb development	12/438	176/17913	0.00133807	0.0151537	0.0114656	1311/2697/26585/4223/4488/7026/5125/5396/860/10512/6423/7291	12
BP	GO:1901136	carbohydrate derivative catabolic process	12/438	176/17913	0.00133807	0.0151537	0.0114656	633/57214/1634/1806/10082/4060/4907/4969/4958/5136/6383/1462	12
BP	GO:0050878	regulation of body fluid levels	24/438	499/17913	0.00133962	0.0151537	0.0114656	150/1278/1281/1311/1910/2013/2149/2152/2191/2192/2627/2697/3937/64805/5156/10630/5327/5592/10544/5627/7035/7980/7057/23414	24
BP	GO:0002573	myeloid leukocyte differentiation	13/438	201/17913	0.00138611	0.015636	0.0118305	760/56975/2200/2353/3600/3624/4254/10234/4057/8544/5468/7098/10100	13
BP	GO:1904894	positive regulation of STAT cascade	8/438	88/17913	0.00139657	0.0157104	0.0118868	6352/1545/2149/2690/3479/3600/3606/3575	8
BP	GO:0048871	multicellular organismal homeostasis	23/438	472/17913	0.00141497	0.0158735	0.0120102	11096/760/729230/1513/54360/1910/2034/2149/2167/2697/3600/3606/3910/9079/4057/4237/50507/56034/5743/4982/25937/10413/23090	23
BP	GO:0042692	muscle cell differentiation	19/438	359/17913	0.00141911	0.0158761	0.0120122	8038/650/858/1311/1910/8324/2627/26585/3479/4015/4629/50507/5156/5738/5999/6095/85461/7168/7490	19
BP	GO:0046579	positive regulation of Ras protein signal transduction	6/438	51/17913	0.00146624	0.0162245	0.0122758	1281/2149/3479/4254/1902/6091	6
BP	GO:0048146	positive regulation of fibroblast proliferation	6/438	51/17913	0.00146624	0.0162245	0.0122758	2335/2355/3479/56034/5156/7472	6
BP	GO:0070098	chemokine-mediated signaling pathway	6/438	51/17913	0.00146624	0.0162245	0.0122758	57007/6352/729230/1524/6387/6091	6
BP	GO:0072132	mesenchyme morphogenesis	6/438	51/17913	0.00146624	0.0162245	0.0122758	59/650/4488/6091/6591/7291	6
BP	GO:0045862	positive regulation of proteolysis	18/438	333/17913	0.00148674	0.0164067	0.0124136	8754/150/84168/718/1942/2149/2152/2192/2335/5118/10769/5468/6091/6279/6280/6423/152503/51429	18
BP	GO:0003203	endocardial cushion morphogenesis	5/438	35/17913	0.00151427	0.0165113	0.0124928	650/4488/6091/6591/7291	5
BP	GO:0003094	glomerular filtration	4/438	21/17913	0.00151655	0.0165113	0.0124928	2013/2149/2697/23213	4
BP	GO:0030728	ovulation	4/438	21/17913	0.00151655	0.0165113	0.0124928	9510/3624/5743/7130	4
BP	GO:0071498	cellular response to fluid shear stress	4/438	21/17913	0.00151655	0.0165113	0.0124928	760/9314/5743/7980	4
BP	GO:1903010	regulation of bone development	4/438	21/17913	0.00151655	0.0165113	0.0124928	2200/26585/4015/4057	4
BP	GO:0060346	bone trabecula formation	3/438	10/17913	0.00153287	0.0166	0.0125599	26585/4313/4488	3
BP	GO:0099550	trans-synaptic signaling, modulating synaptic transmission	3/438	10/17913	0.00153287	0.0166	0.0125599	2149/2982/5327	3
BP	GO:0007200	phospholipase C-activating G protein-coupled receptor signaling pathway	7/438	70/17913	0.00158457	0.0170689	0.0129146	150/55107/1524/1910/2149/1902/64805	7
BP	GO:0060193	positive regulation of lipase activity	7/438	70/17913	0.00158457	0.0170689	0.0129146	6352/1909/3357/1902/64805/5156/6401	7
BP	GO:0034333	adherens junction assembly	8/438	90/17913	0.00161458	0.0172095	0.0130211	2042/10979/26585/22998/8829/5796/7057/80139	8
BP	GO:0042102	positive regulation of T cell proliferation	8/438	90/17913	0.00161458	0.0172095	0.0130211	301/6352/729230/3479/3485/3600/3606/10673	8
BP	GO:0060349	bone morphogenesis	8/438	90/17913	0.00161458	0.0172095	0.0130211	1311/55790/4057/4488/860/6423/6424/7291	8
BP	GO:1901888	regulation of cell junction assembly	8/438	90/17913	0.00161458	0.0172095	0.0130211	2042/2697/26585/22998/8829/6591/7057/7082	8
BP	GO:0010952	positive regulation of peptidase activity	12/438	180/17913	0.00162026	0.0172182	0.0130276	84168/1942/2149/2152/2192/2335/5118/5468/6091/6279/6280/6423	12
BP	GO:0003179	heart valve morphogenesis	6/438	52/17913	0.00162388	0.0172182	0.0130276	650/1942/182/6091/6591/7291	6
BP	GO:0034332	adherens junction organization	10/438	134/17913	0.00169713	0.0179104	0.0135513	1009/1012/2042/10979/26585/22998/8829/5796/7057/80139	10
BP	GO:1905330	regulation of morphogenesis of an epithelium	12/438	181/17913	0.00169798	0.0179104	0.0135513	115908/51339/2252/8324/10082/26585/59277/84870/6423/6591/23213/7472	12
BP	GO:0007409	axonogenesis	20/438	393/17913	0.00171416	0.0179484	0.0135801	104/3730/1009/1123/152330/6387/9201/1942/55740/2335/4147/8829/59277/65059/6091/6285/10512/23111/6696/51330	20
BP	GO:0031670	cellular response to nutrient	7/438	71/17913	0.00172165	0.0179484	0.0135801	2348/3600/64805/10631/5468/5743/6591	7
BP	GO:0003156	regulation of animal organ formation	5/438	36/17913	0.00172368	0.0179484	0.0135801	650/6091/23213/7472/7490	5
BP	GO:0008038	neuron recognition	5/438	36/17913	0.00172368	0.0179484	0.0135801	152330/2042/8829/50863/6091	5
BP	GO:1905521	regulation of macrophage migration	5/438	36/17913	0.00172368	0.0179484	0.0135801	6352/1524/64805/5919/7057	5
BP	GO:1901655	cellular response to ketone	8/438	91/17913	0.00173325	0.0180019	0.0136206	8644/114907/2706/2770/9314/687/5468/6696	8
BP	GO:0010977	negative regulation of neuron projection development	10/438	135/17913	0.00179394	0.0185388	0.0140268	1522/1809/1942/1902/8829/10769/5376/23111/6695/6696	10
BP	GO:0060421	positive regulation of heart growth	6/438	53/17913	0.00179408	0.0185388	0.0140268	2627/3479/7472/7490/10413/23414	6
BP	GO:0048799	animal organ maturation	4/438	22/17913	0.00181812	0.0186449	0.0141071	650/26585/3479/4057	4
BP	GO:0097205	renal filtration	4/438	22/17913	0.00181812	0.0186449	0.0141071	2013/2149/2697/23213	4
BP	GO:2000050	regulation of non-canonical Wnt signaling pathway	4/438	22/17913	0.00181812	0.0186449	0.0141071	51339/84870/6423/6424	4
BP	GO:0003279	cardiac septum development	9/438	113/17913	0.00182527	0.0186711	0.0141269	2627/182/4488/8829/55742/5125/6091/10512/23414	9
BP	GO:2001233	regulation of apoptotic signaling pathway	20/438	397/17913	0.0019299	0.0196917	0.0148991	57007/1524/6387/64798/2537/3479/3624/3685/8829/5743/6279/6280/6423/6591/8406/6934/7057/7078/51330/10413	20
BP	GO:0050731	positive regulation of peptidyl-tyrosine phosphorylation	12/438	184/17913	0.00194974	0.0198337	0.0150065	150/6352/1942/2252/2690/26585/3479/3600/3606/4254/50507/8829	12
BP	GO:1905314	semi-lunar valve development	5/438	37/17913	0.00195357	0.0198337	0.0150065	1942/182/6091/6591/7291	5
BP	GO:0061005	cell differentiation involved in kidney development	6/438	54/17913	0.00197745	0.0199762	0.0151144	59/26585/182/7490/25937/10413	6
BP	GO:0097755	positive regulation of blood vessel diameter	6/438	54/17913	0.00197745	0.0199762	0.0151144	9732/1910/2697/2982/3672/5592	6
BP	GO:0008584	male gonad development	10/438	137/17913	0.00200098	0.0201637	0.0152563	8644/2627/2697/3624/4254/5156/6423/7098/7490/23414	10
BP	GO:0002521	leukocyte differentiation	23/438	485/17913	0.00200619	0.0201662	0.0152581	301/760/729230/915/56975/2200/2353/8324/3600/3606/3575/3624/4254/10234/4057/8544/5468/6095/860/387357/7098/26022/10100	23
BP	GO:0003208	cardiac ventricle morphogenesis	7/438	73/17913	0.00202331	0.020288	0.0153503	1301/1363/182/10512/6423/7168/23414	7
BP	GO:0003093	regulation of glomerular filtration	3/438	11/17913	0.00206963	0.0205999	0.0155863	2013/2149/2697	3
BP	GO:0019371	cyclooxygenase pathway	3/438	11/17913	0.00206963	0.0205999	0.0155863	8644/5740/5743	3
BP	GO:0032351	negative regulation of hormone metabolic process	3/438	11/17913	0.00206963	0.0205999	0.0155863	8644/650/27122	3
BP	GO:0014065	phosphatidylinositol 3-kinase signaling	10/438	138/17913	0.00211149	0.0209141	0.015824	6352/1634/2149/3357/3479/3606/9314/5156/5783/7291	10
BP	GO:0046546	development of primary male sexual characteristics	10/438	138/17913	0.00211149	0.0209141	0.015824	8644/2627/2697/3624/4254/5156/6423/7098/7490/23414	10
BP	GO:0051090	regulation of DNA-binding transcription factor activity	21/438	429/17913	0.00212729	0.0210053	0.015893	306/1524/1545/54360/5167/2353/26585/3606/9314/4057/4488/5468/5740/6279/6280/6424/56849/6934/7098/7291/7472	21
BP	GO:0060191	regulation of lipase activity	8/438	94/17913	0.00213104	0.0210053	0.015893	6352/1909/3357/1902/64805/5125/5156/6401	8
BP	GO:1900746	regulation of vascular endothelial growth factor signaling pathway	4/438	23/17913	0.00215884	0.0212277	0.0160613	1634/6091/64094/10253	4
BP	GO:0048008	platelet-derived growth factor receptor signaling pathway	6/438	55/17913	0.00217466	0.0213316	0.0161399	2152/4015/8829/56034/5156/5157	6
BP	GO:0007431	salivary gland development	5/438	38/17913	0.00220509	0.0215261	0.0162871	2252/8829/59277/10512/6591	5
BP	GO:0090050	positive regulation of cell migration involved in sprouting angiogenesis	5/438	38/17913	0.00220509	0.0215261	0.0162871	301/8829/10769/5743/27286	5
BP	GO:0018108	peptidyl-tyrosine phosphorylation	18/438	346/17913	0.00226043	0.0220134	0.0166558	150/6352/8445/2202/1942/2042/2252/2690/26585/3479/3600/3606/4254/50507/8829/56034/5156/6423	18
BP	GO:0001952	regulation of cell-matrix adhesion	9/438	117/17913	0.00231891	0.0224752	0.0170051	1012/2013/2042/26585/182/22998/8829/10631/7057	9
BP	GO:0014066	regulation of phosphatidylinositol 3-kinase signaling	9/438	117/17913	0.00231891	0.0224752	0.0170051	6352/1634/2149/3479/3606/9314/5156/5783/7291	9
BP	GO:0033619	membrane protein proteolysis	6/438	56/17913	0.00238633	0.0230735	0.0174579	8754/150/152503/51429/7076/7078	6
BP	GO:0034329	cell junction assembly	13/438	214/17913	0.00241544	0.0232996	0.0176289	2042/10979/2335/2697/2706/26585/22998/8829/5796/6591/7057/7082/80139	13
BP	GO:0007044	cell-substrate junction assembly	8/438	96/17913	0.00243381	0.0234211	0.0177209	2042/10979/2335/26585/22998/8829/5796/7057	8
BP	GO:2000826	regulation of heart morphogenesis	5/438	39/17913	0.00247938	0.0237568	0.0179748	650/182/6091/10512/7291	5
BP	GO:0018212	peptidyl-tyrosine modification	18/438	349/17913	0.00248039	0.0237568	0.0179748	150/6352/8445/2202/1942/2042/2252/2690/26585/3479/3600/3606/4254/50507/8829/56034/5156/6423	18
BP	GO:0042481	regulation of odontogenesis	4/438	24/17913	0.00254116	0.0241113	0.0182431	54829/650/860/4982	4
BP	GO:0043567	regulation of insulin-like growth factor receptor signaling pathway	4/438	24/17913	0.00254116	0.0241113	0.0182431	650/8483/3479/3485	4
BP	GO:0060343	trabecula formation	4/438	24/17913	0.00254116	0.0241113	0.0182431	9510/26585/4313/4488	4
BP	GO:1902547	regulation of cellular response to vascular endothelial growth factor stimulus	4/438	24/17913	0.00254116	0.0241113	0.0182431	1634/6091/64094/10253	4
BP	GO:0048844	artery morphogenesis	7/438	76/17913	0.00255059	0.0241444	0.0182681	1281/1311/2348/182/4638/8829/5396	7
BP	GO:0022029	telencephalon cell migration	6/438	57/17913	0.00261314	0.0245617	0.0185838	6387/85458/3912/8829/64805/6091	6
BP	GO:0060688	regulation of morphogenesis of a branching structure	6/438	57/17913	0.00261314	0.0245617	0.0185838	2252/26585/59277/6591/23213/7472	6
BP	GO:0019935	cyclic-nucleotide-mediated signaling	11/438	166/17913	0.00261886	0.0245617	0.0185838	283383/150/10203/1910/2770/2983/3357/1902/5350/5592/7057	11
BP	GO:0031345	negative regulation of cell projection organization	11/438	166/17913	0.00261886	0.0245617	0.0185838	1522/1809/1942/1902/8829/10769/5376/23111/6695/6696/10253	11
BP	GO:1901343	negative regulation of vasculature development	12/438	191/17913	0.0026576	0.0248675	0.0188153	729230/1524/1634/9314/4223/10769/5468/10253/23213/7057/7058/7490	12
BP	GO:0009886	post-embryonic animal morphogenesis	3/438	12/17913	0.00270973	0.0251812	0.0190526	2202/2200/4237	3
BP	GO:0042340	keratan sulfate catabolic process	3/438	12/17913	0.00270973	0.0251812	0.0190526	4060/4969/4958	3
BP	GO:0042487	regulation of odontogenesis of dentin-containing tooth	3/438	12/17913	0.00270973	0.0251812	0.0190526	650/860/4982	3
BP	GO:0071383	cellular response to steroid hormone stimulus	14/438	243/17913	0.00272362	0.0252525	0.0191066	8644/301/1407/114907/2274/2706/687/7026/56937/5468/6095/7035/7041/10413	14
BP	GO:0034109	homotypic cell-cell adhesion	7/438	77/17913	0.00274796	0.0254202	0.0192334	6352/1311/64805/5156/10630/5592/80139	7
BP	GO:0042089	cytokine biosynthetic process	9/438	120/17913	0.00275448	0.0254226	0.0192352	729230/1524/3606/3624/9314/5125/79589/7057/7098	9
BP	GO:0050848	regulation of calcium-mediated signaling	8/438	98/17913	0.00276927	0.0255012	0.0192947	1012/1193/8445/2274/2633/3479/5350/50852	8
BP	GO:0019369	arachidonic acid metabolic process	5/438	40/17913	0.00277761	0.0255201	0.019309	8644/1545/5321/5740/5743	5
BP	GO:0048638	regulation of developmental growth	17/438	325/17913	0.00279877	0.0256565	0.0194122	6387/2335/2627/2690/2697/3479/4886/8829/5999/6423/23111/6696/51330/7472/7490/10413/23414	17
BP	GO:0051924	regulation of calcium ion transport	14/438	244/17913	0.00282684	0.0258554	0.0195627	150/781/6352/57214/1193/6387/2149/2669/2697/4638/64805/5350/5743/5999	14
BP	GO:0010324	membrane invagination	6/438	58/17913	0.00285573	0.0260025	0.019674	718/51454/4481/5468/51429/7057	6
BP	GO:0051057	positive regulation of small GTPase mediated signal transduction	6/438	58/17913	0.00285573	0.0260025	0.019674	1281/2149/3479/4254/1902/6091	6
BP	GO:0042107	cytokine metabolic process	9/438	121/17913	0.00291322	0.0261978	0.0198218	729230/1524/3606/3624/9314/5125/79589/7057/7098	9
BP	GO:0050730	regulation of peptidyl-tyrosine phosphorylation	14/438	245/17913	0.00293325	0.0261978	0.0198218	150/6352/1942/2252/2690/26585/3479/3600/3606/4254/50507/8829/56034/6423	14
BP	GO:0009266	response to temperature stimulus	13/438	219/17913	0.00294983	0.0261978	0.0198218	55107/6387/2353/3357/3479/56925/5468/5743/286133/6489/56892/7041/7057	13
BP	GO:0043588	skin development	20/438	412/17913	0.00295529	0.0261978	0.0198218	8754/9509/8644/301/147495/1278/1281/1289/1290/1311/1475/1513/2252/2355/3624/182/9079/4488/23022/10413	20
BP	GO:0001570	vasculogenesis	7/438	78/17913	0.00295682	0.0261978	0.0198218	57007/2013/3685/3696/7490/10413/23414	7
BP	GO:0010771	negative regulation of cell morphogenesis involved in differentiation	7/438	78/17913	0.00295682	0.0261978	0.0198218	1942/2192/2633/8829/10631/23111/6696	7
BP	GO:0003071	renal system process involved in regulation of systemic arterial blood pressure	4/438	25/17913	0.00296749	0.0261978	0.0198218	2013/2149/2697/5125	4
BP	GO:0030194	positive regulation of blood coagulation	4/438	25/17913	0.00296749	0.0261978	0.0198218	2149/2152/10630/7057	4
BP	GO:0034110	regulation of homotypic cell-cell adhesion	4/438	25/17913	0.00296749	0.0261978	0.0198218	6352/10630/5592/80139	4
BP	GO:0042730	fibrinolysis	4/438	25/17913	0.00296749	0.0261978	0.0198218	2191/5327/5627/7057	4
BP	GO:0050901	leukocyte tethering or rolling	4/438	25/17913	0.00296749	0.0261978	0.0198218	729230/1524/6387/6401	4
BP	GO:0090025	regulation of monocyte chemotaxis	4/438	25/17913	0.00296749	0.0261978	0.0198218	6352/729230/6387/26585	4
BP	GO:1900048	positive regulation of hemostasis	4/438	25/17913	0.00296749	0.0261978	0.0198218	2149/2152/10630/7057	4
BP	GO:1901623	regulation of lymphocyte chemotaxis	4/438	25/17913	0.00296749	0.0261978	0.0198218	6352/729230/10563/9547	4
BP	GO:0007159	leukocyte cell-cell adhesion	17/438	328/17913	0.0030743	0.0270655	0.0204783	301/6352/729230/1524/6387/29851/3479/3485/3600/3606/3575/9314/4907/6279/6280/6401/10673	17
BP	GO:0034763	negative regulation of transmembrane transport	9/438	122/17913	0.00307911	0.0270655	0.0204783	150/1193/5167/2669/55022/5350/5999/7057/7291	9
BP	GO:0006911	phagocytosis, engulfment	5/438	41/17913	0.00310096	0.02714	0.0205347	718/51454/4481/5468/7057	5
BP	GO:2000404	regulation of T cell migration	5/438	41/17913	0.00310096	0.02714	0.0205347	6364/6352/729230/6387/10563	5
BP	GO:0045123	cellular extravasation	6/438	59/17913	0.00311479	0.0271442	0.0205378	729230/1524/6387/3554/3672/6401	6
BP	GO:0045843	negative regulation of striated muscle tissue development	6/438	59/17913	0.00311479	0.0271442	0.0205378	650/8324/2697/5999/6285/7291	6
BP	GO:0055021	regulation of cardiac muscle tissue growth	7/438	79/17913	0.00317763	0.0276325	0.0209073	2627/2697/3479/5999/7472/10413/23414	7
BP	GO:0032147	activation of protein kinase activity	16/438	303/17913	0.00335534	0.0287863	0.0217803	8754/150/650/6352/1848/2013/2149/2690/26585/3479/3606/3672/1902/56034/7057/7098	16
BP	GO:0021885	forebrain cell migration	6/438	60/17913	0.00339099	0.0287863	0.0217803	6387/85458/3912/8829/64805/6091	6
BP	GO:0048635	negative regulation of muscle organ development	6/438	60/17913	0.00339099	0.0287863	0.0217803	650/8324/2697/5999/6285/7291	6
BP	GO:2000401	regulation of lymphocyte migration	6/438	60/17913	0.00339099	0.0287863	0.0217803	6364/6352/729230/6387/10563/9547	6
BP	GO:0001822	kidney development	15/438	276/17913	0.00340056	0.0287863	0.0217803	59/9510/650/760/1634/2200/26585/182/8829/5125/5156/23213/7490/25937/10413	15
BP	GO:0050886	endocrine process	7/438	80/17913	0.00341081	0.0287863	0.0217803	1066/1407/1522/2149/3624/5125/140606	7
BP	GO:0008360	regulation of cell shape	9/438	124/17913	0.0034332	0.0287863	0.0217803	301/2059/10979/2335/1902/55742/10630/6285/7168	9
BP	GO:0002825	regulation of T-helper 1 type immune response	4/438	26/17913	0.00344021	0.0287863	0.0217803	301/729230/3606/3554	4
BP	GO:0030201	heparan sulfate proteoglycan metabolic process	4/438	26/17913	0.00344021	0.0287863	0.0217803	55790/9953/23213/6934	4
BP	GO:0050820	positive regulation of coagulation	4/438	26/17913	0.00344021	0.0287863	0.0217803	2149/2152/10630/7057	4
BP	GO:0061437	renal system vasculature development	4/438	26/17913	0.00344021	0.0287863	0.0217803	59/8829/5156/7490	4
BP	GO:0061440	kidney vasculature development	4/438	26/17913	0.00344021	0.0287863	0.0217803	59/8829/5156/7490	4
BP	GO:1905048	regulation of metallopeptidase activity	4/438	26/17913	0.00344021	0.0287863	0.0217803	84168/7076/7077/7078	4
BP	GO:2001234	negative regulation of apoptotic signaling pathway	13/438	223/17913	0.00344364	0.0287863	0.0217803	57007/1524/6387/2537/3479/3685/8829/5743/6423/6591/6934/7057/10413	13
BP	GO:0042088	T-helper 1 type immune response	5/438	42/17913	0.00345058	0.0287863	0.0217803	301/729230/3606/3554/26022	5
BP	GO:0010839	negative regulation of keratinocyte proliferation	3/438	13/17913	0.00345917	0.0287863	0.0217803	687/5796/6591	3
BP	GO:0042574	retinal metabolic process	3/438	13/17913	0.00345917	0.0287863	0.0217803	8644/220/1545	3
BP	GO:0050872	white fat cell differentiation	3/438	13/17913	0.00345917	0.0287863	0.0217803	2167/5468/6591	3
BP	GO:0061430	bone trabecula morphogenesis	3/438	13/17913	0.00345917	0.0287863	0.0217803	26585/4313/4488	3
BP	GO:0090594	inflammatory response to wounding	3/438	13/17913	0.00345917	0.0287863	0.0217803	729230/2149/7076	3
BP	GO:1900025	negative regulation of substrate adhesion-dependent cell spreading	3/438	13/17913	0.00345917	0.0287863	0.0217803	2192/2633/10631	3
BP	GO:0022407	regulation of cell-cell adhesion	19/438	389/17913	0.00347911	0.028893	0.021861	301/650/6352/729230/6387/10563/29851/3479/3485/3600/3606/3575/182/9314/10630/5592/6591/10673/80139	19
BP	GO:0043406	positive regulation of MAP kinase activity	14/438	250/17913	0.00351579	0.029138	0.0220464	8754/150/650/1848/2149/2690/3357/3479/3672/4254/1902/50507/6091/7057	14
BP	GO:0090257	regulation of muscle system process	14/438	251/17913	0.00364293	0.0301223	0.0227911	150/10203/1193/9732/2149/114907/2982/3479/9314/5350/5592/5743/5999/7168	14
BP	GO:0007045	cell-substrate adherens junction assembly	7/438	81/17913	0.00365681	0.0301223	0.0227911	2042/10979/26585/22998/8829/5796/7057	7
BP	GO:0048041	focal adhesion assembly	7/438	81/17913	0.00365681	0.0301223	0.0227911	2042/10979/26585/22998/8829/5796/7057	7
BP	GO:0003170	heart valve development	6/438	61/17913	0.00368501	0.030171	0.022828	650/1942/182/6091/6591/7291	6
BP	GO:0032835	glomerulus development	6/438	61/17913	0.00368501	0.030171	0.022828	59/182/5156/23213/7490/25937	6
BP	GO:0048645	animal organ formation	6/438	61/17913	0.00368501	0.030171	0.022828	2348/2627/6091/23213/7472/7490	6
BP	GO:0072503	cellular divalent inorganic cation homeostasis	19/438	392/17913	0.00377992	0.0308858	0.0233688	781/6352/6355/729230/57214/1193/6387/10563/1909/1910/2149/2697/3357/3685/1902/5156/5350/6279/6280	19
BP	GO:0003044	regulation of systemic arterial blood pressure mediated by a chemical signal	5/438	43/17913	0.00382763	0.031088	0.0235218	1066/1522/2149/5125/7168	5
BP	GO:0010470	regulation of gastrulation	5/438	43/17913	0.00382763	0.031088	0.0235218	1289/1290/8324/9314/6423	5
BP	GO:0010883	regulation of lipid storage	5/438	43/17913	0.00382763	0.031088	0.0235218	718/3685/4481/5468/158219	5
BP	GO:0048732	gland development	20/438	422/17913	0.00386641	0.0313403	0.0237127	220/650/27122/2252/2487/2627/2697/3400/4488/8829/59277/5156/6091/10512/6591/23213/79971/7472/7490/80139	20
BP	GO:0045445	myoblast differentiation	7/438	82/17913	0.00391606	0.0316795	0.0239693	9547/2034/26585/3479/3606/182/6934	7
BP	GO:0003081	regulation of systemic arterial blood pressure by renin-angiotensin	4/438	27/17913	0.00396162	0.0319209	0.024152	1066/1522/2149/5125	4
BP	GO:0045671	negative regulation of osteoclast differentiation	4/438	27/17913	0.00396162	0.0319209	0.024152	2200/10234/4057/7098	4
BP	GO:0038034	signal transduction in absence of ligand	6/438	62/17913	0.00399753	0.0320196	0.0242267	2537/3624/3685/4254/6591/8406	6
BP	GO:0097192	extrinsic apoptotic signaling pathway in absence of ligand	6/438	62/17913	0.00399753	0.0320196	0.0242267	2537/3624/3685/4254/6591/8406	6
BP	GO:1901862	negative regulation of muscle tissue development	6/438	62/17913	0.00399753	0.0320196	0.0242267	650/8324/2697/5999/6285/7291	6
BP	GO:0002548	monocyte chemotaxis	5/438	44/17913	0.00423329	0.033518	0.0253604	301/6352/729230/6387/26585	5
BP	GO:0021795	cerebral cortex cell migration	5/438	44/17913	0.00423329	0.033518	0.0253604	85458/3912/8829/64805/6091	5
BP	GO:0048483	autonomic nervous system development	5/438	44/17913	0.00423329	0.033518	0.0253604	104/1909/1910/2335/8829	5
BP	GO:0055076	transition metal ion homeostasis	8/438	105/17913	0.0042352	0.033518	0.0253604	79901/2034/9843/4057/6279/6280/286133/261729	8
BP	GO:0032355	response to estradiol	9/438	128/17913	0.00423692	0.033518	0.0253604	2697/2706/3485/4488/7026/10631/5743/7035/80139	9
BP	GO:0045995	regulation of embryonic development	9/438	128/17913	0.00423692	0.033518	0.0253604	1289/1290/8324/3479/9314/3910/6423/23213/7472	9
BP	GO:0030168	platelet activation	10/438	152/17913	0.00424237	0.033518	0.0253604	150/1278/1281/1311/2149/3937/64805/5156/10630/5592	10
BP	GO:0016525	negative regulation of angiogenesis	11/438	177/17913	0.00427524	0.0335516	0.0253858	729230/1524/1634/9314/4223/10769/5468/10253/23213/7057/7058	11
BP	GO:0021953	central nervous system neuron differentiation	11/438	177/17913	0.00427524	0.0335516	0.0253858	104/1009/9201/3400/3624/8829/6091/6095/6423/6695/7472	11
BP	GO:0002523	leukocyte migration involved in inflammatory response	3/438	14/17913	0.00432336	0.0335516	0.0253858	6279/6280/6401	3
BP	GO:0010820	positive regulation of T cell chemotaxis	3/438	14/17913	0.00432336	0.0335516	0.0253858	6352/729230/10563	3
BP	GO:0010885	regulation of cholesterol storage	3/438	14/17913	0.00432336	0.0335516	0.0253858	4481/5468/158219	3
BP	GO:0030207	chondroitin sulfate catabolic process	3/438	14/17913	0.00432336	0.0335516	0.0253858	633/1634/1462	3
BP	GO:0032780	negative regulation of ATPase activity	3/438	14/17913	0.00432336	0.0335516	0.0253858	1266/4057/5350	3
BP	GO:1905049	negative regulation of metallopeptidase activity	3/438	14/17913	0.00432336	0.0335516	0.0253858	7076/7077/7078	3
BP	GO:2000095	regulation of Wnt signaling pathway, planar cell polarity pathway	3/438	14/17913	0.00432336	0.0335516	0.0253858	51339/84870/6423	3
BP	GO:0055025	positive regulation of cardiac muscle tissue development	6/438	63/17913	0.00432923	0.0335516	0.0253858	2627/26585/3479/7472/10413/23414	6
BP	GO:0034612	response to tumor necrosis factor	15/438	284/17913	0.00442881	0.0342579	0.0259202	8754/83643/6352/3576/2167/2633/55022/10631/5743/6095/6401/7057/4982/51330/10673	15
BP	GO:0009100	glycoprotein metabolic process	18/438	369/17913	0.00445218	0.0343732	0.0260074	84002/633/650/337876/1301/55790/54360/1634/92126/727936/9953/3479/3600/9445/6489/23213/6934/1462	18
BP	GO:0090100	positive regulation of transmembrane receptor protein serine/threonine kinase signaling pathway	7/438	84/17913	0.00447613	0.0344925	0.0260977	650/3624/4488/23213/7041/7057/23090	7
BP	GO:0018146	keratan sulfate biosynthetic process	4/438	28/17913	0.00453397	0.0347405	0.0262853	4060/4969/4958/10402	4
BP	GO:0034698	response to gonadotropin	4/438	28/17913	0.00453397	0.0347405	0.0262853	2627/2706/3624/7490	4
BP	GO:0042311	vasodilation	4/438	28/17913	0.00453397	0.0347405	0.0262853	1910/2982/3672/5592	4
BP	GO:0010975	regulation of neuron projection development	21/438	458/17913	0.00454912	0.0347909	0.0263235	1123/1522/6387/1809/1942/2042/2335/9314/1902/8829/10769/5376/5396/6091/6280/6383/6423/23111/6695/6696/51330	21
BP	GO:0060562	epithelial tube morphogenesis	16/438	313/17913	0.00458648	0.0350107	0.0264898	650/115908/1522/1909/2348/2697/26585/9645/4488/8829/6423/10253/7291/7472/7490/10413	16
BP	GO:0043409	negative regulation of MAPK cascade	11/438	179/17913	0.0046506	0.0352015	0.0266341	51339/1848/1942/2192/2633/9314/2122/5999/6423/10253/7078	11
BP	GO:2000181	negative regulation of blood vessel morphogenesis	11/438	179/17913	0.0046506	0.0352015	0.0266341	729230/1524/1634/9314/4223/10769/5468/10253/23213/7057/7058	11
BP	GO:0050922	negative regulation of chemotaxis	5/438	45/17913	0.0046687	0.0352015	0.0266341	10563/26585/8829/6091/7057	5
BP	GO:0061756	leukocyte adhesion to vascular endothelial cell	5/438	45/17913	0.0046687	0.0352015	0.0266341	729230/1524/6387/9314/6401	5
BP	GO:0045670	regulation of osteoclast differentiation	6/438	64/17913	0.00468082	0.0352015	0.0266341	760/2200/2353/10234/4057/7098	6
BP	GO:0046622	positive regulation of organ growth	6/438	64/17913	0.00468082	0.0352015	0.0266341	2627/3479/7472/7490/10413/23414	6
BP	GO:0060135	maternal process involved in female pregnancy	6/438	64/17913	0.00468082	0.0352015	0.0266341	2697/2706/7026/5740/5743/6696	6
BP	GO:0071230	cellular response to amino acid stimulus	6/438	64/17913	0.00468082	0.0352015	0.0266341	1278/1281/1290/4313/56034/5156	6
BP	GO:0030900	forebrain development	18/438	371/17913	0.00470575	0.0353236	0.0267265	220/306/650/22903/1281/6387/9201/85458/55970/3400/3624/3912/1902/7026/8829/64805/5592/6091	18
BP	GO:0051235	maintenance of location	15/438	286/17913	0.00472196	0.0353799	0.0267691	718/57214/1193/1407/5167/2149/2200/3357/3685/4481/5350/5468/6279/6280/158219	15
BP	GO:0001938	positive regulation of endothelial cell proliferation	8/438	107/17913	0.0047476	0.0355064	0.0268648	650/858/1012/6387/2152/3357/8829/7472	8
BP	GO:0045844	positive regulation of striated muscle tissue development	7/438	85/17913	0.00477786	0.0355364	0.0268875	2627/2697/26585/3479/7472/10413/23414	7
BP	GO:0046427	positive regulation of JAK-STAT cascade	7/438	85/17913	0.00477786	0.0355364	0.0268875	6352/1545/2149/2690/3479/3600/3606	7
BP	GO:0048636	positive regulation of muscle organ development	7/438	85/17913	0.00477786	0.0355364	0.0268875	2627/2697/26585/3479/7472/10413/23414	7
BP	GO:1901652	response to peptide	22/438	491/17913	0.00488167	0.0362422	0.0274215	760/781/858/1407/6387/1910/5167/2200/2690/2697/2706/2770/3479/182/9314/4313/55022/5350/5468/5743/5919/7076	22
BP	GO:0019216	regulation of lipid metabolic process	19/438	402/17913	0.00494277	0.0366288	0.0277141	150/8644/650/718/83643/27122/2274/3357/9314/4199/64805/5156/5468/5743/5919/6095/6591/158219/7291	19
BP	GO:0010769	regulation of cell morphogenesis involved in differentiation	14/438	260/17913	0.00496461	0.0367236	0.0277858	1123/6387/1942/2192/2335/2633/8829/10630/10631/6091/6383/23111/6696/51330	14
BP	GO:0051099	positive regulation of binding	11/438	181/17913	0.00505166	0.0372415	0.0281777	650/1193/115908/51339/3479/9314/8829/10769/5468/6934/7291	11
BP	GO:0071300	cellular response to retinoic acid	6/438	65/17913	0.00505296	0.0372415	0.0281777	2042/8324/9314/5468/7472/10413	6
BP	GO:0048145	regulation of fibroblast proliferation	7/438	86/17913	0.00509465	0.037413	0.0283074	2335/2355/3479/56034/5156/5468/7472	7
BP	GO:1901863	positive regulation of muscle tissue development	7/438	86/17913	0.00509465	0.037413	0.0283074	2627/2697/26585/3479/7472/10413/23414	7
BP	GO:0030514	negative regulation of BMP signaling pathway	5/438	46/17913	0.00513501	0.0374386	0.0283268	91851/2200/26585/5654/6423	5
BP	GO:0032330	regulation of chondrocyte differentiation	5/438	46/17913	0.00513501	0.0374386	0.0283268	2202/26585/4094/860/6591	5
BP	GO:0060324	face development	5/438	46/17913	0.00513501	0.0374386	0.0283268	220/83690/83716/4313/5156	5
BP	GO:2000107	negative regulation of leukocyte apoptotic process	5/438	46/17913	0.00513501	0.0374386	0.0283268	6352/6387/1942/3575/4254	5
BP	GO:0060441	epithelial tube branching involved in lung morphogenesis	4/438	29/17913	0.00515945	0.0375493	0.0284105	1522/10253/7472/10413	4
BP	GO:0010566	regulation of ketone biosynthetic process	3/438	15/17913	0.00530708	0.0382807	0.028964	8644/650/27122	3
BP	GO:0010759	positive regulation of macrophage chemotaxis	3/438	15/17913	0.00530708	0.0382807	0.028964	6352/5919/7057	3
BP	GO:0010819	regulation of T cell chemotaxis	3/438	15/17913	0.00530708	0.0382807	0.028964	6352/729230/10563	3
BP	GO:0050961	detection of temperature stimulus involved in sensory perception	3/438	15/17913	0.00530708	0.0382807	0.028964	55107/6387/56925	3
BP	GO:0050965	detection of temperature stimulus involved in sensory perception of pain	3/438	15/17913	0.00530708	0.0382807	0.028964	55107/6387/56925	3
BP	GO:0001818	negative regulation of cytokine production	15/438	290/17913	0.00535561	0.0385623	0.029177	301/50856/1524/2335/2627/2633/3479/3624/9314/55353/4057/79589/6504/7057/7291	15
BP	GO:0048144	fibroblast proliferation	7/438	87/17913	0.00542697	0.039007	0.0295134	2335/2355/3479/56034/5156/5468/7472	7
BP	GO:1903672	positive regulation of sprouting angiogenesis	6/438	66/17913	0.00544636	0.0390772	0.0295665	301/9314/8829/10769/5743/27286	6
BP	GO:0048639	positive regulation of developmental growth	11/438	183/17913	0.00547961	0.0392464	0.0296946	6387/2335/2627/2690/3479/8829/51330/7472/7490/10413/23414	11
BP	GO:0072001	renal system development	15/438	291/17913	0.00552432	0.039497	0.0298842	59/9510/650/760/1634/2200/26585/182/8829/5125/5156/23213/7490/25937/10413	15
BP	GO:0043535	regulation of blood vessel endothelial cell migration	10/438	158/17913	0.00556094	0.0396889	0.0300294	301/1942/9314/4223/8829/10769/5468/5743/27286/7057	10
BP	GO:0070665	positive regulation of leukocyte proliferation	9/438	134/17913	0.00570953	0.0406779	0.0307777	301/6352/729230/3479/3485/3600/3606/4254/10673	9
BP	GO:0010743	regulation of macrophage derived foam cell differentiation	4/438	30/17913	0.00584017	0.0413908	0.0313171	3606/3685/4481/5468	4
BP	GO:0060325	face morphogenesis	4/438	30/17913	0.00584017	0.0413908	0.0313171	83690/83716/4313/5156	4
BP	GO:1902895	positive regulation of pri-miRNA transcription by RNA polymerase II	4/438	30/17913	0.00584017	0.0413908	0.0313171	650/2353/7003/7490	4
BP	GO:0050918	positive chemotaxis	6/438	67/17913	0.0058617	0.041471	0.0313778	6352/1012/3576/2152/2252/8829	6
BP	GO:0046620	regulation of organ growth	8/438	111/17913	0.00591374	0.0417664	0.0316013	2627/2697/3479/5999/7472/7490/10413/23414	8
BP	GO:0043405	regulation of MAP kinase activity	16/438	322/17913	0.00598915	0.0422256	0.0319487	8754/150/650/1848/2149/2690/3357/3479/3672/4254/1902/50507/5999/6091/6423/7057	16
BP	GO:0048667	cell morphogenesis involved in neuron differentiation	22/438	500/17913	0.00601038	0.0423019	0.0320064	104/3730/22903/1009/1123/152330/6387/9201/1942/55740/2335/4147/8829/59277/65059/6091/6285/6383/10512/23111/6696/51330	22
BP	GO:0045927	positive regulation of growth	14/438	266/17913	0.00604336	0.0424604	0.0321263	6387/2335/2627/2690/3479/8829/6279/6280/6423/51330/7472/7490/10413/23414	14
BP	GO:0046661	male sex differentiation	10/438	160/17913	0.00606519	0.0424668	0.0321312	8644/2627/2697/3624/4254/5156/6423/7098/7490/23414	10
BP	GO:0048015	phosphatidylinositol-mediated signaling	10/438	160/17913	0.00606519	0.0424668	0.0321312	6352/1634/2149/3357/3479/3606/9314/5156/5783/7291	10
BP	GO:0002762	negative regulation of myeloid leukocyte differentiation	5/438	48/17913	0.00616485	0.0430903	0.032603	2200/3624/10234/4057/7098	5
BP	GO:0021987	cerebral cortex development	8/438	112/17913	0.00623664	0.0433359	0.0327888	22903/1281/85458/55970/3912/8829/64805/6091	8
BP	GO:0060419	heart growth	8/438	112/17913	0.00623664	0.0433359	0.0327888	2627/2697/3479/5999/7472/7490/10413/23414	8
BP	GO:0016485	protein processing	15/438	295/17913	0.00624268	0.0433359	0.0327888	9509/718/1066/3075/3426/1311/1522/2152/2619/5122/5125/5327/5627/7057/26022	15
BP	GO:0043010	camera-type eye development	15/438	295/17913	0.00624268	0.0433359	0.0327888	220/1295/1545/2202/2200/2697/3624/182/9314/8829/5156/23554/7291/7472/7490	15
BP	GO:0001655	urogenital system development	16/438	324/17913	0.00634375	0.0438875	0.0332062	59/9510/650/760/1634/2200/26585/3400/182/8829/5125/5156/23213/7490/25937/10413	16
BP	GO:0007265	Ras protein signal transduction	16/438	324/17913	0.00634375	0.0438875	0.0332062	150/1012/1278/1281/2059/2149/3479/4254/1902/10787/8829/10630/10769/23362/6091/7077	16
BP	GO:0072507	divalent inorganic cation homeostasis	19/438	412/17913	0.00638562	0.0439283	0.033237	781/6352/6355/729230/57214/1193/6387/10563/1909/1910/2149/2697/3357/3685/1902/5156/5350/6279/6280	19
BP	GO:0001977	renal system process involved in regulation of blood volume	3/438	16/17913	0.00641455	0.0439283	0.033237	2013/2149/2697	3
BP	GO:0010878	cholesterol storage	3/438	16/17913	0.00641455	0.0439283	0.033237	4481/5468/158219	3
BP	GO:0033631	cell-cell adhesion mediated by integrin	3/438	16/17913	0.00641455	0.0439283	0.033237	8754/6352/10563	3
BP	GO:0036035	osteoclast development	3/438	16/17913	0.00641455	0.0439283	0.033237	56975/2200/4057	3
BP	GO:0072148	epithelial cell fate commitment	3/438	16/17913	0.00641455	0.0439283	0.033237	7026/8829/10630	3
BP	GO:0001894	tissue homeostasis	12/438	214/17913	0.00656908	0.0446721	0.0337998	760/729230/1513/54360/2034/2149/9079/4057/50507/4982/25937/10413	12
BP	GO:0060560	developmental growth involved in morphogenesis	12/438	214/17913	0.00656908	0.0446721	0.0337998	6387/9201/2335/8829/10631/65059/6423/23111/6696/10253/51330/10413	12
BP	GO:0035767	endothelial cell chemotaxis	4/438	31/17913	0.00657817	0.0446721	0.0337998	10563/8829/64094/7057	4
BP	GO:0061311	cell surface receptor signaling pathway involved in heart development	4/438	31/17913	0.00657817	0.0446721	0.0337998	650/182/4488/6591	4
BP	GO:1902230	negative regulation of intrinsic apoptotic signaling pathway in response to DNA damage	4/438	31/17913	0.00657817	0.0446721	0.0337998	57007/6387/6423/6591	4
BP	GO:0055023	positive regulation of cardiac muscle tissue growth	5/438	49/17913	0.00673062	0.0455551	0.0344678	2627/3479/7472/10413/23414	5
BP	GO:2001238	positive regulation of extrinsic apoptotic signaling pathway	5/438	49/17913	0.00673062	0.0455551	0.0344678	3624/8406/7057/7078/51330	5
BP	GO:0048662	negative regulation of smooth muscle cell proliferation	6/438	69/17913	0.00676097	0.0456843	0.0345657	3600/9314/4969/5468/5592/7168	6
BP	GO:0007584	response to nutrient	12/438	215/17913	0.00680871	0.0459305	0.0347519	8644/2348/3485/3600/64805/10631/5468/5743/6423/6591/6696/4982	12
BP	GO:0048017	inositol lipid-mediated signaling	10/438	163/17913	0.00688756	0.0463854	0.0350961	6352/1634/2149/3357/3479/3606/9314/5156/5783/7291	10
BP	GO:0006937	regulation of muscle contraction	10/438	164/17913	0.00718006	0.0482752	0.036526	150/10203/1193/9732/2149/2982/5350/5592/5743/7168	10
BP	GO:0044272	sulfur compound biosynthetic process	11/438	190/17913	0.00720702	0.0483764	0.0366025	633/337876/55790/1634/92126/2947/4060/4969/4958/10402/1462	11
BP	GO:0042471	ear morphogenesis	8/438	115/17913	0.00728591	0.0487447	0.0368812	220/1301/115908/2487/121227/5396/10253/7291	8
BP	GO:0070252	actin-mediated cell contraction	8/438	115/17913	0.00728591	0.0487447	0.0368812	781/2013/122786/2697/55742/10630/5350/7168	8
BP	GO:0008347	glial cell migration	5/438	50/17913	0.00733174	0.0488102	0.0369307	729230/1524/3912/4147/64805	5
BP	GO:0060425	lung morphogenesis	5/438	50/17913	0.00733174	0.0488102	0.0369307	1522/2252/10253/7472/10413	5
BP	GO:2000725	regulation of cardiac muscle cell differentiation	5/438	50/17913	0.00733174	0.0488102	0.0369307	650/8324/26585/3479/5999	5
BP	GO:0016486	peptide hormone processing	4/438	32/17913	0.00737541	0.0490205	0.0370899	1066/1522/5122/5125	4
BP	GO:0071900	regulation of protein serine/threonine kinase activity	21/438	479/17913	0.0074673	0.0495502	0.0374906	8754/150/650/57214/1848/2149/2690/3357/3479/3672/4254/1902/4057/50507/7026/5999/6091/6423/10253/56892/7057	21
BP	GO:0034614	cellular response to reactive oxygen species	10/438	165/17913	0.00748208	0.0495673	0.0375036	8644/1545/10516/2353/2983/9314/4313/5156/5796/7168	10
BP	GO:0070482	response to oxygen levels	18/438	389/17913	0.00756678	0.0499551	0.037797	650/6387/1909/2034/2627/1902/378938/50507/5327/5352/10631/5468/5740/5743/6095/6285/7057/7291	18
BP	GO:0042095	interferon-gamma biosynthetic process	3/438	17/17913	0.00764947	0.0499551	0.037797	3606/3624/7098	3
BP	GO:0048535	lymph node development	3/438	17/17913	0.00764947	0.0499551	0.037797	3600/3575/10630	3
BP	GO:0060850	regulation of transcription involved in cell fate commitment	3/438	17/17913	0.00764947	0.0499551	0.037797	7026/5468/6095	3
BP	GO:0061298	retina vasculature development in camera-type eye	3/438	17/17913	0.00764947	0.0499551	0.037797	1545/8829/5156	3
BP	GO:0070233	negative regulation of T cell apoptotic process	3/438	17/17913	0.00764947	0.0499551	0.037797	6352/1942/3575	3
BP	GO:1903975	regulation of glial cell migration	3/438	17/17913	0.00764947	0.0499551	0.037797	729230/1524/64805	3
BP	GO:0010633	negative regulation of epithelial cell migration	8/438	116/17913	0.00766363	0.0499551	0.037797	10563/1634/9314/4163/4223/7026/5468/7057	8
BP	GO:0022612	gland morphogenesis	8/438	116/17913	0.00766363	0.0499551	0.037797	2252/3400/4488/8829/59277/10512/6591/23213	8
BP	GO:0072089	stem cell proliferation	8/438	116/17913	0.00766363	0.0499551	0.037797	1524/2192/3400/4254/2122/6423/6591/10413	8
BP	GO:0009101	glycoprotein biosynthetic process	15/438	302/17913	0.00767945	0.0499779	0.0378143	84002/633/337876/55790/54360/1634/92126/727936/9953/3479/3600/9445/6489/6934/1462	15
CC	GO:0031012	extracellular matrix	86/457	468/18678	1.23123e-50	4.29699e-48	3.62889e-48	25890/9510/9509/11096/165/3730/301/54829/633/151887/1012/8483/1300/1301/1303/7373/1306/1278/81578/1281/1289/1290/1293/1295/1311/83716/115908/1522/6387/1634/1805/1842/10085/2202/25975/2152/2192/2199/10516/2200/2335/10082/26585/83872/5654/3910/3912/4015/131578/4053/4060/4147/4237/4239/8076/4256/4312/4313/25878/22795/59277/4969/4958/5118/10631/5919/6279/6280/6383/6423/64094/8404/8406/27286/23213/798…	86
CC	GO:0062023	collagen-containing extracellular matrix	80/457	399/18678	4.68987e-50	8.18383e-48	6.91139e-48	25890/9510/9509/11096/165/301/54829/633/151887/1012/8483/1300/1301/1303/7373/1306/1278/81578/1281/1289/1290/1293/1295/1311/115908/1522/6387/1634/1805/1842/10085/2202/25975/2152/2192/2199/10516/2200/2335/10082/26585/83872/5654/3910/3912/131578/4053/4060/4147/4237/4239/8076/4256/4313/25878/22795/59277/4969/4958/5118/10631/5919/6279/6280/6383/6423/64094/8404/8406/27286/23213/7041/7045/7057/7058/7076…	80
CC	GO:0044420	extracellular matrix component	17/457	47/18678	4.19674e-16	4.88221e-14	4.12311e-14	1301/1303/7373/1306/1278/1281/1289/1290/1295/2192/10516/2200/3912/4060/4237/4239/8076	17
CC	GO:0005604	basement membrane	20/457	91/18678	5.1597e-14	4.50183e-12	3.80188e-12	9510/151887/1306/1289/1295/25975/2192/2200/2335/83872/3910/3912/4147/22795/59277/64094/7045/7058/7076/7078	20
CC	GO:0005788	endoplasmic reticulum lumen	34/457	306/18678	1.78538e-13	1.2462e-11	1.05244e-11	11096/79642/718/1066/91851/1300/1301/1303/7373/1306/1278/81578/1281/1289/1290/1293/1295/1522/56975/2200/2335/11167/493869/3912/4148/56034/11098/5743/6383/8404/6696/7057/7076/1462	34
CC	GO:0005581	collagen trimer	17/457	86/18678	2.53466e-11	1.47433e-09	1.2451e-09	1300/1301/1303/7373/1306/1278/81578/1281/1289/1290/1293/1295/115908/1634/4015/4060/4481	17
CC	GO:0005583	fibrillar collagen trimer	6/457	11/18678	8.64572e-08	3.7717e-06	3.18527e-06	1301/1278/1281/1289/1290/4060	6
CC	GO:0098643	banded collagen fibril	6/457	11/18678	8.64572e-08	3.7717e-06	3.18527e-06	1301/1278/1281/1289/1290/4060	6
CC	GO:0098644	complex of collagen trimers	7/457	18/18678	1.26363e-07	4.9001e-06	4.13822e-06	1301/1278/1281/1289/1290/1295/4060	7
CC	GO:0031252	cell leading edge	27/457	384/18678	9.94557e-07	3.471e-05	2.93133e-05	59/84168/1809/55740/2059/2191/10979/3685/4254/9079/4163/4638/10787/4810/23022/55742/10630/23362/5783/5796/65059/6285/51429/10253/51330/7168/79971	27
CC	GO:0005925	focal adhesion	27/457	397/18678	1.88017e-06	5.5515e-05	4.68834e-05	8754/301/858/1012/1266/1466/85458/55740/2191/10979/2273/2274/2697/3672/3685/3693/10787/91624/4810/50507/8829/23022/55742/10544/390/171024/7041	27
CC	GO:0005912	adherens junction	31/457	496/18678	1.94715e-06	5.5515e-05	4.68834e-05	8754/301/858/1012/1266/1466/85458/55740/2191/10979/2273/2274/2697/3672/3685/3693/182/10787/91624/4810/50507/8829/23022/55742/10544/5796/390/171024/7041/7082/83604	31
CC	GO:0005924	cell-substrate adherens junction	27/457	399/18678	2.06789e-06	5.5515e-05	4.68834e-05	8754/301/858/1012/1266/1466/85458/55740/2191/10979/2273/2274/2697/3672/3685/3693/10787/91624/4810/50507/8829/23022/55742/10544/390/171024/7041	27
CC	GO:0030055	cell-substrate junction	27/457	404/18678	2.61509e-06	6.51905e-05	5.50545e-05	8754/301/858/1012/1266/1466/85458/55740/2191/10979/2273/2274/2697/3672/3685/3693/10787/91624/4810/50507/8829/23022/55742/10544/390/171024/7041	27
CC	GO:0030027	lamellipodium	17/457	191/18678	4.88687e-06	0.000113701	9.60228e-05	59/84168/1809/55740/2191/10979/3685/4254/4163/4638/10787/4810/23022/55742/10630/5783/65059	17
CC	GO:0031258	lamellipodium membrane	6/457	22/18678	1.11029e-05	0.000242183	0.000204528	84168/2191/10979/3685/10787/10630	6
CC	GO:0009897	external side of plasma membrane	16/457	199/18678	3.28284e-05	0.000673948	0.000569161	8754/166647/84168/301/1012/2152/2348/29851/3554/3575/3672/3685/64805/5156/7057/7472	16
CC	GO:0001527	microfibril	4/457	10/18678	6.60725e-05	0.00128107	0.00108189	2200/4237/4239/8076	4
CC	GO:0005614	interstitial matrix	4/457	11/18678	0.000101823	0.00187032	0.00157952	25890/151887/1842/64094	4
CC	GO:0005901	caveola	9/457	79/18678	0.000131179	0.00228908	0.00193317	858/112464/1012/2149/64805/5740/5743/6401/7035	9
CC	GO:0005796	Golgi lumen	10/457	102/18678	0.000199172	0.00331005	0.0027954	633/1634/10082/4060/4969/4958/5125/5627/6383/1462	10
CC	GO:0044853	plasma membrane raft	10/457	106/18678	0.000273128	0.0043328	0.00365913	858/112464/1012/2149/3937/64805/5740/5743/6401/7035	10
CC	GO:0031256	leading edge membrane	12/457	153/18678	0.000391385	0.00593885	0.00501547	84168/2059/2191/10979/3685/10787/10630/23362/5796/10253/7168/79971	12
CC	GO:0043202	lysosomal lumen	9/457	94/18678	0.00049121	0.00714301	0.0060324	633/1513/1634/10082/4060/4969/4958/6383/1462	9
CC	GO:0098552	side of membrane	20/457	359/18678	0.000579077	0.00808392	0.00682702	8754/166647/84168/301/858/1012/2152/10979/2348/2669/29851/3554/3575/3672/3685/64805/5156/51429/7057/7472	20
CC	GO:0043292	contractile fiber	14/457	209/18678	0.000659958	0.00885866	0.0074813	59/800/114907/10979/2697/4313/4629/91624/23022/55742/9659/27295/171024/7168	14
CC	GO:0001726	ruffle	12/457	168/18678	0.000902052	0.0116599	0.00984696	2059/2191/3685/10787/23022/10630/23362/6285/51429/10253/51330/7168	12
CC	GO:0045121	membrane raft	17/457	309/18678	0.00167092	0.020809	0.0175736	858/112464/1012/1910/2013/2149/2697/2770/3672/3937/64805/10630/5740/5743/6401/23213/7035	17
CC	GO:0098857	membrane microdomain	17/457	310/18678	0.00172911	0.020809	0.0175736	858/112464/1012/1910/2013/2149/2697/2770/3672/3937/64805/10630/5740/5743/6401/23213/7035	17
CC	GO:0031253	cell projection membrane	17/457	317/18678	0.00218621	0.0254329	0.0214785	84168/79901/2059/2121/2191/10979/2348/3685/3775/10787/64805/10630/23362/10253/200728/7168/79971	17
CC	GO:0001725	stress fiber	6/457	56/18678	0.00239607	0.0261321	0.0220691	10979/22998/4638/50507/171024/7168	6
CC	GO:0097517	contractile actin filament bundle	6/457	56/18678	0.00239607	0.0261321	0.0220691	10979/22998/4638/50507/171024/7168	6
CC	GO:0098589	membrane region	17/457	321/18678	0.00249006	0.0263343	0.0222398	858/112464/1012/1910/2013/2149/2697/2770/3672/3937/64805/10630/5740/5743/6401/23213/7035	17
CC	GO:0032432	actin filament bundle	6/457	59/18678	0.0031273	0.0321008	0.0271097	10979/22998/4638/50507/171024/7168	6
CC	GO:0098802	plasma membrane receptor complex	10/457	153/18678	0.00447071	0.0445794	0.0376481	650/10203/915/917/2059/3672/3685/3693/3696/50852	10
CC	GO:0015629	actin cytoskeleton	20/457	432/18678	0.00505761	0.0483072	0.0407963	59/301/800/1266/83992/1809/10979/2633/55970/22998/4629/4638/10787/50507/23022/27295/51429/171024/7082/7168	20
CC	GO:0031225	anchored component of membrane	10/457	156/18678	0.00512139	0.0483072	0.0407963	1012/5067/152330/1368/2348/2619/10082/4907/50863/7035	10
MF	GO:0005201	extracellular matrix structural constituent	52/423	158/16969	3.46142e-44	1.79302e-41	1.49752e-41	25890/165/3730/54829/633/8483/1300/1301/1303/7373/1306/1278/81578/1281/1289/1290/1293/1295/1311/115908/1634/1805/10085/2202/2192/2199/10516/2200/2335/83872/3910/3912/4053/4060/4147/4148/4237/4239/8076/4256/25878/22795/4969/5118/10631/8406/27286/7980/7045/7057/7058/1462	52
MF	GO:0005539	glycosaminoglycan binding	35/423	199/16969	5.32267e-20	1.37857e-17	1.15138e-17	25890/9510/11096/3730/633/151887/6355/57214/3075/1301/1289/1311/83716/10563/1634/1809/1833/59271/2200/2252/2335/11167/4053/4057/56925/8829/5118/10631/84870/64094/26032/7057/7058/7130/1462	35
MF	GO:0008201	heparin binding	27/423	148/16969	4.11098e-16	7.09829e-14	5.92847e-14	25890/9510/11096/3730/151887/6355/3075/1301/1289/1311/83716/10563/59271/2200/2252/2335/11167/4053/4057/56925/8829/5118/10631/84870/64094/7057/7058	27
MF	GO:1901681	sulfur compound binding	30/423	221/16969	3.78026e-14	4.89543e-12	4.08865e-12	25890/9510/11096/3730/151887/6355/3075/1301/1289/1311/83716/10563/1809/5167/59271/2200/2252/2335/11167/2947/4053/4057/56925/8829/5118/10631/84870/64094/7057/7058	30
MF	GO:0005518	collagen binding	17/423	61/16969	7.91485e-14	8.19979e-12	6.84843e-12	25890/8754/165/84168/54829/7373/1311/1513/1634/2335/3672/131578/4060/22795/5118/7045/7057	17
MF	GO:0005178	integrin binding	21/423	113/16969	5.58125e-13	4.81848e-11	4.02438e-11	8754/11096/1281/1289/1311/6387/1842/10085/25975/2013/2191/10516/2200/2335/3479/3685/6423/6696/7045/7057/7077	21
MF	GO:0030020	extracellular matrix structural constituent conferring tensile strength	12/423	41/16969	2.02502e-10	1.49852e-08	1.25156e-08	1300/1301/1303/7373/1306/1278/81578/1281/1289/1290/1293/1295	12
MF	GO:0050840	extracellular matrix binding	10/423	43/16969	7.65633e-08	4.95747e-06	4.14046e-06	8754/11096/633/1301/1634/3685/131578/59277/7045/7057	10
MF	GO:0061134	peptidase regulator activity	19/423	192/16969	3.48111e-07	2.00357e-05	1.67338e-05	3730/718/1293/51232/1475/2192/2335/4057/56925/5118/51050/5627/6423/6691/6695/7035/7076/7077/7078	19
MF	GO:0050839	cell adhesion molecule binding	30/423	444/16969	8.14408e-07	4.21864e-05	3.52339e-05	8754/11096/301/800/1012/1266/1281/1289/1311/1363/6387/1842/10085/25975/2013/2191/10516/2200/2335/3479/3685/57502/55742/6423/51429/6696/7045/7057/7077/7082	30
MF	GO:0001968	fibronectin binding	7/423	24/16969	1.36487e-06	6.4273e-05	5.36805e-05	151887/1513/2192/3685/131578/6423/7057	7
MF	GO:0019838	growth factor binding	14/423	121/16969	1.93059e-06	8.33373e-05	6.96029e-05	1278/1281/1289/51232/10563/5654/3485/3554/3685/4053/8829/5156/27286/7057	14
MF	GO:0017147	Wnt-protein binding	7/423	27/16969	3.28252e-06	0.000130796	0.00010924	147495/115908/2487/8324/6423/6424/79971	7
MF	GO:0005125	cytokine activity	15/423	154/16969	7.26699e-06	0.000268879	0.000224566	6352/6387/10563/9547/3576/26585/3600/3606/3624/4254/6696/7076/4982/10673/7472	15
MF	GO:0030021	extracellular matrix structural constituent conferring compression resistance	6/423	21/16969	9.1453e-06	0.000297703	0.000248641	54829/633/1634/4060/4969/1462	6
MF	GO:0030414	peptidase inhibitor activity	15/423	157/16969	9.19547e-06	0.000297703	0.000248641	3730/718/1293/51232/1475/4057/56925/51050/5627/6691/6695/7035/7076/7077/7078	15
MF	GO:0048018	receptor ligand activity	25/423	397/16969	2.26404e-05	0.000689867	0.000576174	650/6352/6387/10563/9547/3576/2202/2200/2252/26585/50810/3479/3600/3606/3624/182/4254/4969/56034/6423/6696/7076/4982/10673/7472	25
MF	GO:0061135	endopeptidase regulator activity	14/423	154/16969	3.18713e-05	0.000917186	0.00076603	3730/718/1293/51232/1475/4057/56925/5627/6423/6691/6695/7035/7076/7078	14
MF	GO:0019955	cytokine binding	11/423	100/16969	3.9201e-05	0.00106874	0.000892611	57007/729230/1311/1524/2633/26585/3554/3685/8829/10630/7057	11
MF	GO:0001664	G protein-coupled receptor binding	16/423	205/16969	5.79355e-05	0.00150053	0.00125324	150/718/6364/6352/729230/25927/115908/6387/10563/9547/3576/1910/8324/2770/79971/7472	16
MF	GO:0030545	receptor regulator activity	25/423	425/16969	6.90129e-05	0.00170232	0.00142177	650/6352/6387/10563/9547/3576/2202/2200/2252/26585/50810/3479/3600/3606/3624/182/4254/4969/56034/6423/6696/7076/4982/10673/7472	25
MF	GO:0004866	endopeptidase inhibitor activity	13/423	149/16969	9.27297e-05	0.00218336	0.00182354	3730/718/1293/51232/1475/4057/56925/5627/6691/6695/7035/7076/7078	13
MF	GO:0048407	platelet-derived growth factor binding	4/423	11/16969	0.000109321	0.00246211	0.00205634	1278/1281/1289/5156	4
MF	GO:0042379	chemokine receptor binding	7/423	47/16969	0.000151262	0.00326473	0.00272669	6364/6352/729230/6387/10563/9547/3576	7
MF	GO:0019956	chemokine binding	5/423	23/16969	0.000218243	0.004522	0.00377675	57007/729230/1524/3685/10630	5
MF	GO:0043394	proteoglycan binding	6/423	36/16969	0.000239214	0.00476588	0.00398045	3075/1289/1311/1513/2335/7057	6
MF	GO:0008191	metalloendopeptidase inhibitor activity	4/423	14/16969	0.00031246	0.00569134	0.00475338	56925/6695/7076/7078	4
MF	GO:0036041	long-chain fatty acid binding	4/423	14/16969	0.00031246	0.00569134	0.00475338	2167/5468/6279/6280	4
MF	GO:0008083	growth factor activity	12/423	147/16969	0.000318627	0.00569134	0.00475338	650/6387/2202/2252/50810/3479/3624/182/4254/4969/56034/7076	12
MF	GO:0031406	carboxylic acid binding	13/423	176/16969	0.000480529	0.00829713	0.00692973	57214/2167/2348/7026/5352/5468/6279/6280/6401/26032/6999/7130/1462	13
MF	GO:0004252	serine-type endopeptidase activity	11/423	133/16969	0.000502007	0.00838838	0.00700594	3426/2152/2191/5654/4057/4312/4313/5122/5125/5327/11098	11
MF	GO:0043177	organic acid binding	13/423	178/16969	0.000535028	0.00866077	0.00723344	57214/2167/2348/7026/5352/5468/6279/6280/6401/26032/6999/7130/1462	13
MF	GO:0008009	chemokine activity	5/423	30/16969	0.000800754	0.0125694	0.0104979	6352/6387/10563/9547/3576	5
MF	GO:0002020	protease binding	10/423	121/16969	0.000899558	0.013705	0.0114464	1278/1281/1311/1475/2152/2191/2335/3554/3685/7077	10
MF	GO:0004714	transmembrane receptor protein tyrosine kinase activity	6/423	49/16969	0.00130775	0.0188068	0.0157074	51232/2202/2042/8829/5156/5157	6
MF	GO:0001965	G-protein alpha-subunit binding	4/423	20/16969	0.00134334	0.0188068	0.0157074	2149/3357/1902/5999	4
MF	GO:0005540	hyaluronic acid binding	4/423	20/16969	0.00134334	0.0188068	0.0157074	57214/26032/7130/1462	4
MF	GO:0045236	CXCR chemokine receptor binding	3/423	10/16969	0.0016198	0.0220804	0.0184415	6387/10563/3576	3
MF	GO:0004222	metalloendopeptidase activity	8/423	89/16969	0.00169308	0.0224876	0.0187815	8038/8754/9510/9509/11096/2191/4312/4313	8
MF	GO:0004857	enzyme inhibitor activity	18/423	332/16969	0.00176706	0.0228834	0.0191122	3730/301/718/1293/51232/1475/4057/56925/51050/5350/5627/6691/6695/10253/7035/7076/7077/7078	18
MF	GO:0008236	serine-type peptidase activity	11/423	158/16969	0.00205941	0.0256487	0.0214217	3426/2152/2191/5654/4057/4312/4313/5122/5125/5327/11098	11
MF	GO:0046332	SMAD binding	7/423	72/16969	0.00207963	0.0256487	0.0214217	650/1278/1281/1290/2353/56937/7041	7
MF	GO:0050786	RAGE receptor binding	3/423	11/16969	0.00218623	0.0257379	0.0214962	6279/6280/6285	3
MF	GO:0097493	structural molecule activity conferring elasticity	3/423	11/16969	0.00218623	0.0257379	0.0214962	2199/10516/2200	3
MF	GO:0017171	serine hydrolase activity	11/423	163/16969	0.00262806	0.0302519	0.0252663	3426/2152/2191/5654/4057/4312/4313/5122/5125/5327/11098	11
MF	GO:0004175	endopeptidase activity	17/423	322/16969	0.00308228	0.0347091	0.0289889	8038/8754/9510/9509/11096/3426/1513/2152/2191/5654/4057/4312/4313/5122/5125/5327/11098	17
MF	GO:0030165	PDZ domain binding	7/423	79/16969	0.00352847	0.0381676	0.0318774	51232/9732/8324/2697/55970/1902/6383	7
MF	GO:0005520	insulin-like growth factor binding	4/423	26/16969	0.00368413	0.0381676	0.0318774	51232/5654/3485/3685	4
MF	GO:0043236	laminin binding	4/423	26/16969	0.00368413	0.0381676	0.0318774	8754/131578/59277/7057	4
MF	GO:0048020	CCR chemokine receptor binding	4/423	26/16969	0.00368413	0.0381676	0.0318774	6364/6352/729230/10563	4
MF	GO:0005161	platelet-derived growth factor receptor binding	3/423	14/16969	0.00456215	0.0463372	0.0387006	3554/56034/5156	3
MF	GO:0008528	G protein-coupled peptide receptor activity	8/423	105/16969	0.00474278	0.0472454	0.0394591	57007/10203/729230/1524/1909/1910/2149/4886	8
MF	GO:0005504	fatty acid binding	4/423	28/16969	0.0048519	0.0474205	0.0396054	2167/5468/6279/6280	4
MF	GO:0001653	peptide receptor activity	8/423	106/16969	0.00502143	0.0481686	0.0402302	57007/10203/729230/1524/1909/1910/2149/4886	8
MF	GO:0038024	cargo receptor activity	7/423	85/16969	0.0052931	0.0498514	0.0416357	57007/3426/5167/2348/29967/4481/286133	7

## Sheet: Table S8
Supplementary Table-S8: Pathway enrichment analysis of two DLBCL subclasses.
NMFTYPE1 Specific enrichment pathway
NMFTYPE2 Specific enrichment pathway
ID	Description	GeneRatio	BgRatio	pvalue	p.adjust	qvalue	geneID	Count
hsa04512	ECM-receptor interaction	13/215	88/8075	4.84679e-07	0.000111476	9.38746e-05	1278/1293/1311/2335/3672/3685/3693/3696/3910/3912/6696/7057/7058	13
hsa04510	Focal adhesion	19/215	201/8075	1.48472e-06	0.000170743	0.000143784	858/1278/1293/1311/2335/3479/3672/3685/3693/3696/3910/3912/4638/55742/56034/5156/6696/7057/7058	19
hsa04151	PI3K-Akt signaling pathway	26/215	354/8075	2.2341e-06	0.000171281	0.000144237	1278/1293/1311/1942/2149/2252/2335/2690/2791/55970/3479/3575/3672/3685/3693/3696/4254/3910/3912/1902/10161/56034/5156/6696/7057/7058	26
hsa04974	Protein digestion and absorption	12/215	103/8075	1.6915e-05	0.000972612	0.000819042	1300/1301/1303/7373/1306/1278/81578/1281/1289/1290/1293/1295	12
hsa05144	Malaria	8/215	50/8075	4.54344e-05	0.00208998	0.00175999	1311/3576/3606/3820/6383/6401/7057/7058	8
hsa04061	Viral protein interaction with cytokine and cytokine receptor	11/215	100/8075	6.53717e-05	0.00250591	0.00211024	57007/6364/6352/6355/729230/1524/6387/10563/9547/3576/3606	11
hsa04540	Gap junction	10/215	88/8075	0.000106881	0.00279478	0.0023535	2697/2770/2982/2983/3357/1902/56034/5156/5592/7082	10
hsa05205	Proteoglycans in cancer	16/215	205/8075	0.000108632	0.00279478	0.0023535	858/1278/1634/2335/8324/3316/3479/3685/3693/4060/4313/6383/7057/7078/7291/7472	16
hsa04060	Cytokine-cytokine receptor interaction	20/215	295/8075	0.000109361	0.00279478	0.0023535	57007/650/6364/6352/6355/729230/1524/6387/10563/9547/3576/2690/3600/3606/3554/3575/3624/4982/51330/10673	20
hsa05323	Rheumatoid arthritis	10/215	93/8075	0.000170398	0.00391915	0.00330033	6364/6352/1513/6387/3576/2353/3600/3606/4312/10673	10
hsa04810	Regulation of actin cytoskeleton	16/215	218/8075	0.000221933	0.00464042	0.00390772	6387/55740/2149/2252/2335/55970/3672/3685/3693/3696/1902/4629/4638/10787/56034/5156	16
hsa04610	Complement and coagulation cascades	9/215	85/8075	0.000404937	0.0077613	0.00653583	718/3075/3426/2149/2152/5327/10544/5627/7035	9
hsa04611	Platelet activation	11/215	124/8075	0.000446682	0.00790284	0.00665502	1278/1281/2149/2770/2982/2983/3937/4638/64805/5321/5592	11
hsa05165	Human papillomavirus infection	20/215	331/8075	0.000503185	0.0082666	0.00696135	1278/1293/1311/2335/8324/3672/3685/3693/3696/182/3910/3912/55534/5743/6696/6934/7057/7058/7098/7472	20
hsa04270	Vascular smooth muscle contraction	11/215	133/8075	0.00080876	0.012401	0.0104429	59/10203/800/1909/2982/2983/4629/4638/5321/94274/5592	11
hsa04926	Relaxin signaling pathway	10/215	129/8075	0.00225982	0.0324849	0.0273557	59/1278/1281/1910/2353/2770/2791/55970/4312/4313	10

## Sheet: Table S9
Supplementary Table-S9: CIBERSORT calculated the infiltration of immune cells
Mixture	B cells naive	B cells memory	Plasma cells	T cells CD8	T cells CD4 naive	T cells CD4 memory resting	T cells CD4 memory activated	T cells follicular helper	T cells regulatory (Tregs)	T cells gamma delta	NK cells resting	NK cells activated	Monocytes	Macrophages M0	Macrophages M1	Macrophages M2	Dendritic cells resting	Dendritic cells activated	Mast cells resting	Mast cells activated	Eosinophils	Neutrophils	P-value	Correlation	RMSE
GSM575635	0.0458381	0.147088	0.0524117	0.0608431	0	0	0.0986558	0.0486281	0	0.0453034	0.0295273	0	0	0.156841	0.169312	0.046757	0	0.042026	0.0394388	0	0.0118723	0.00545756	0	0.494777	0.868858
GSM575636	0.135632	0.128071	0.0388854	0.0948098	0.0393735	0	0.0365093	0.0781939	0	0	0	0.060572	0	0.141866	0.127506	0.053494	0	0	0.0562024	0	0	0.0088851	0	0.589759	0.816914
GSM575637	0.0264829	0.184876	0	0.019862	0	0.140379	0.148976	0.0370455	0	0.0999185	0	0	0	0.0441335	0.161873	0.0793097	0.000311076	0	0.0323597	0	0.0207396	0.00373391	0	0.331685	0.949435
GSM575638	0.230444	0.303797	0	0.0484469	0	0	0.0426848	0.0424935	0	0.0145173	0	0.0300305	0	0.194889	0.0527078	0.0190633	0	0	0.0209263	0	0	0	0	0.581249	0.812983
GSM575639	0.0552193	0.201636	0	0.066907	0	0.129784	0.0064762	0.092208	0	0.0176286	0	0.0327564	0	0.215053	0.100727	0.048202	0	0	0.0200685	0	0.0133337	0	0	0.513951	0.858949
GSM575640	0.054274	0.170127	0.00430521	0.120972	0	0	0.177469	0.0561697	0	0.112704	0	0	0	0.0943829	0.109144	0.0675655	0	0	0.0328871	0	0	0	0	0.531568	0.851766
GSM575641	0.204633	0.346902	0	0.0242164	0	0.0228311	0	0.0705045	0.00267174	0	0	0.0730395	0	0.106897	0.0400377	0.0813168	0	0	0.0269507	0	0	0	0	0.570188	0.820771
GSM575642	0.237875	0.0231428	0.0161541	0.136567	0	0	0.070209	0.0648735	0	0.0355654	0	0.00179017	0	0.138975	0.104809	0.1508	0	0	0.015204	0	0.00248283	0.0015513	0	0.451901	0.891198
GSM575645	0	0.227806	0	0.0453273	0.0293386	0.116112	0.083775	0.0122839	0	0	0	0.0317979	0	0.250922	0.149194	0.0367345	0	0	0.00184832	0	0.00495616	0.00990463	0	0.509875	0.860429
GSM575646	0	0.0715136	0.0305388	0.199117	0	0	0.147384	0.0585406	0	0.214521	0	0.0530383	0	0	0.0641611	0.152906	0.00442408	0	0	0	0	0.00385604	0	0.481831	0.875668
GSM575647	0.112679	0.0710288	0.100503	0.156726	0	0	0.0582404	0.114541	0	0.0856367	0	0.0594831	0	0.0571301	0.0549544	0.0991964	0	0	0	0.0248064	0.0025924	0.0024817	0	0.469444	0.882169
GSM575648	0	0.287017	0.0219643	0.123712	0	0	0.193467	0.079217	0	0.107917	0	0.00665214	0	0	0.0564248	0.0763468	0.0144571	0	0.0287128	0	0.0041115	0	0	0.495331	0.868661
GSM575651	0.193535	0.215859	0.20874	0.0362005	0	0	0.0226826	0.0586608	0	0	0.0266677	0.0064384	0.0153692	0.0247493	0.0471376	0.129065	0	0.0100614	0	0	0.00483361	0	0	0.559883	0.832496
GSM575653	0.0415928	0.512035	0.0563463	0.0645958	0	0	0.0596839	0.0437795	0	0	0.0167422	0	0	0.0585614	0.0221285	0.124535	0	0	0	0	0	0	0	0.593608	0.804147
GSM575654	0.197593	0	0.0404675	0.046668	0	0	0.0277898	0.120169	0	0.188888	0	0.0558893	0	0.119128	0.107252	0.0714385	0.00129493	0	0.0150307	0	0.00839083	0	0	0.514107	0.857956
GSM575656	0.0977878	0.163608	0	0.00805007	0	0.164862	0.0315052	0.0738345	0	0.0767006	0	0.0723585	0	0.117217	0.0633377	0.110385	0.000380359	0	0.0183106	0	0	0.00166289	0	0.251579	0.986786
GSM575658	0.00900305	0.445969	0	0.0795223	0	0	0.0922434	0.0317309	0	0.045801	0	0	0	0.110753	0.0971206	0.0781019	0	0	0.00975468	0	0	0	0	0.448931	0.894962
GSM575659	0.0959488	0.200824	0.0218028	0.0709799	0	0	0.156991	0.0529064	0	0.0616065	0	0	0	0.0387439	0.100632	0.165684	0	0	0.0281183	0	0.00314012	0.00262273	0	0.48423	0.875312
GSM575660	0	0.408627	0	0.0580626	0	0.0377518	0.0474721	0.069902	0	0.0358024	0	0.0488403	0	0.088789	0.0525266	0.114563	0	0	0.0345735	0	0.00308958	0	0	0.348885	0.945752
GSM575663	0.142669	0.146532	0	0.0176484	0.0501438	0.0254207	0	0.127755	0.0179841	0	0	0.0522836	0	0.217827	0.0815589	0.0833733	0	0	0.0320395	0	0.00148712	0.00327753	0	0.481176	0.87605
GSM575664	0.0384364	0.276152	0	0.113167	0	0	0.0313334	0.0990539	0.00419379	0.110817	0	0.0438929	0	0.153605	0.0627417	0.0493545	0.000315994	0	0	0.0169365	0	0	0	0.475239	0.878997
GSM575666	0.123186	0.0591866	0.0304719	0.0541544	0	0.0281175	0.0188648	0.0730671	0	0.0632346	0	0.0722668	0	0.250345	0.121915	0.0626095	0	0	0.0405519	0	0	0.002029	0	0.564216	0.831354
GSM575667	0.0143163	0.486389	0	0.0444516	0	0	0.0821149	0.0518916	0	0.00920598	0	0.0119965	0.0328292	0	0.166231	0.0524214	0.00517953	0	0.030079	0	0.00950257	0.00339107	0	0.642938	0.769162
GSM575668	0.0769951	0.37538	0	0.0183937	0.0297265	0	0.047013	0.0633888	0	0.175773	0	0	0	0.00147512	0.121342	0.0646181	0	0	0.0233704	0	0.00252399	0	0	0.4271	0.910459
GSM575669	0.0933721	0.381585	0	0.0240609	0	0.0164001	0.0204077	0.218085	0	0.0257493	0	0.0228305	0	0.0999742	0.0406947	0.0336173	0	0.00983082	0.0133928	0	0	0	0	0.576862	0.816706
GSM575670	0.0313603	0	0	0.0660633	0.0167655	0	0.0709709	0.0825753	0	0.193811	0	0.0549773	0	0.303525	0.116151	0.0416168	0	0	0.0155645	0	0	0.00661929	0	0.577027	0.819648
GSM575671	0.212505	0.376012	0	0.0329919	0	0.10304	0.0066285	0.103374	0	0.0340525	0	0.0161845	0	0.0501302	0.0177634	0.0379913	0	0	0.00932618	0	0	0	0	0.542633	0.842864
GSM575672	0	0.250147	0	0.0727384	0	0.0501651	0.118191	0.0024144	0	0.00227158	0	0.035405	0	0.239683	0.140428	0.0596319	0	0	0.0275804	0	0	0.00134399	0	0.599746	0.81173
GSM575674	0.120194	0.101768	0	0.0725746	0.0688466	0.207856	0.0181077	0.0170527	0	0.0855113	0	0.0150435	0	0.111914	0.101458	0.0655435	0	0	0.0108449	0	0.00328529	0	0	0.456866	0.888733
GSM575675	0.00672744	0.311444	0	0	0.0347056	0.021453	0.127121	0.00227136	0	0	0	0.0678221	0	0.236515	0.117092	0.0429738	0	0.00909466	0.0216	0	0	0.0011796	0	0.531834	0.848162
GSM575677	0.164609	0.229221	0	0.0790905	0	0.0326602	0.0236268	0.215479	0.0189043	0.028749	0	0.00450891	0	0.119814	0.0264046	0.0402058	0	0.00269871	0.012219	0	0	0.0018096	0	0.620417	0.79009
GSM575680	0.0278515	0.241174	0.00131503	0.188783	0	0	0.111467	0.106651	0	0.105672	0	0	0	0.1061	0.0349988	0.0759872	0	0	0	0	0	0	0	0.482321	0.875339
GSM575683	0.00678259	0.246162	0	0.0270412	0	0	0.0713852	0.136563	0	0.124391	0	0	0	0.2934	0.0538903	0.0250343	0	0	0.0153507	0	0	0	0	0.234949	0.995698
GSM575684	0.40936	0.152954	0.0669445	0.0388128	0	0	0.0241485	0.0559746	0	0	0	0.00681088	0	0.152245	0.0363102	0.0314107	0	0.0128968	0.0121317	0	0	0	0	0.614854	0.788666
GSM575685	0.0773192	0.150746	0.0604374	0.0702826	0	0.0126639	0.156703	0.0396093	0	0.105254	0	0	0.0316925	0	0.0700772	0.183179	0	0	0.0393658	0	0	0.00266991	0	0.438419	0.898126
GSM575686	0.562133	0.161848	0	0.0340329	0	0	0.0241455	0.0310554	0.000780004	0.00750574	0.0219081	0	0	0.121293	0.00350985	0.0251492	0	0.000346268	0.00629279	0	0	0	0	0.623015	0.789918
GSM575690	0.220014	0.257304	0.094478	0.0420395	0	0.0017424	0.0737559	0.0322905	0	0	0.0572147	0	0	0.169432	0.0375715	0.00290396	0	0.011254	0	0	0	0	0	0.521791	0.855238
GSM575691	0.0437658	0.0662068	0.0111119	0.108139	0.0252065	0	0.165648	0.0398971	0	0.14918	0.021393	0	0	0.128163	0.12338	0.0695391	0.000582117	0	0.0400205	0	0.00776843	0	0	0.592356	0.82012
GSM575692	0.16008	0.0117046	0	0.222293	0	0	0.16108	0.0956232	0	0.141203	0	0	0	0.0572986	0.0845534	0.0487916	0	0	0.0173734	0	0	0	0	0.341124	0.949292
GSM575694	0.240453	0.178975	0.01926	0.0617155	0.115326	0.0364172	0.0392614	0.0803221	0.0278799	0.0428542	0	0	0	0.076882	0.0244599	0.044959	0	0.000308292	0.00723336	0	0	0.00369343	0	0.673563	0.750573
GSM575696	0.011147	0.249993	0	0.131799	0	0	0.0711005	0.0618925	0	0.0820607	0	0.00291265	0	0.283214	0.0408684	0.0473558	0	0.00208543	0.0155711	0	0	0	0	0.641493	0.788489
GSM575697	0.0638002	0.304618	0	0.0776614	0	0	0.0707602	0.0960942	0	0.0561784	0.00706381	0	0	0.170833	0.101135	0.039771	0	0	0.0120847	0	0	0	0	0.454089	0.890457
GSM575702	0.154929	0	0.0267638	0.205708	0	0	0.158812	0.0559045	0	0.157754	0	0	0	0.0542215	0.0601362	0.076284	0	0	0.0449533	0	0.0045327	0	0	0.464276	0.884882
GSM575703	0.0607845	0.252995	0.0329825	0.102261	0	0	0.0591914	0.033948	0	0.0785403	0.0281063	0	0	0.168336	0.119287	0.0468369	0	0	0.0167323	0	0	0	0	0.578155	0.821339
GSM274896	0.016609	0.102933	0	0.17986	0	0	0.0844637	0.0451959	0	0.0383282	0	0.0555591	0	0.221326	0.156521	0.0694279	0	0	0.0297772	0	0	0	0	0.666647	0.770326
GSM274898	0.228907	0.310019	0	0.0560516	0	0.0262283	0.0359893	0.0655473	0	0.0353625	0	0.0469045	0	0.0844206	0.0378705	0.0424535	0	0	0.0302458	0	0	0	0	0.60978	0.792539
GSM274899	0.109667	0.272566	0	0.0294378	0	0	0.107038	0.051168	0	0.0105758	0	0.0422064	0	0.256515	0.0570767	0.0334678	0	0	0.0251672	0	0	0.00511492	0	0.613046	0.799729
GSM274901	0.0170336	0.12611	0.253548	0.03084	0.022139	0	0.0986428	0.0649079	0	0.036044	0	0.128243	0	0	0.0715335	0.0595221	0.00188691	0.0307914	0	0.0164491	0.0423084	0	0	0.602804	0.797907
GSM274904	0.114201	0.379494	0	0.057767	0	0.0070866	0.0266952	0.121918	0	0.0446005	0	0.056881	0	0.124963	0.0500723	0.00732934	0	0	0.00899217	0	0	0	0	0.566999	0.823016
GSM274909	0.102782	0.2262	0	0.0131829	0.0908572	0	0.0514643	0.193979	0	0.0875739	0	0	0	0.139866	0.0840865	0.0100077	0	0	0	0	0	0	0	0.528818	0.848863
GSM274914	0.123604	0.355629	0	0.0871406	0	0	0.0448823	0.124489	0.0125861	0	0	0.0348141	0	0.1385	0.043774	0.0125183	0	0.00708835	0.0149742	0	0	0	0	0.711337	0.722723
GSM274917	0.0311948	0.23657	0	0.0261517	0	0	0	0.0545229	0	0.00603891	0	0.0666624	0	0.182543	0.133642	0.214723	0	0.0276439	0	0.00886173	0.00718679	0.00425908	0	0.474734	0.879301
GSM274919	0.0635053	0.194676	0	0.127563	0	0	0.184359	0.0621357	0	0.041374	0	0	0	0.00278856	0.177555	0.127285	0	0	0.0135692	0	0	0.00518944	0	0.642169	0.784062
GSM274931	0	0.171875	0	0.16126	0.000560823	0	0.0294835	0.129234	0.00276961	0.105171	0	0.0792396	0	0.1747	0.0710749	0.0621231	0.00158842	0	0.0109193	0	0	0	0	0.574921	0.823809
GSM274932	0.229228	0.409727	0	0.0964503	0	0	0	0.0808906	0.00178362	0.00178194	0	0.0264023	0	0.0726766	0.0257362	0.0497677	0	0	0.0055554	0	0	0	0	0.536457	0.850715
GSM274936	0	0.196002	0.00533003	0.204928	0	0	0.0441464	0.131963	0	0.112478	0	0.0616256	0	0.107601	0.0538513	0.0748324	0	0	0	0.00724268	0	0	0	0.525532	0.850956
GSM274937	0.330732	0.1286	0	0.0684681	0	0.0599723	0.0252672	0.108153	0.0060163	0.0111885	0	0.034698	0	0.125941	0.0623804	0.0210338	0	0	0.0175488	0	0	0	0	0.558344	0.828912
GSM274942	0.118692	0.168582	0.107984	0.0252601	0.00109012	0	0.148358	0.0271084	0	0	0	0.0358746	0.0282374	0.0131266	0.114534	0.13279	0	0.0151927	0.0261836	0	0.0311682	0.00581791	0	0.545383	0.839599
GSM274946	0.0428512	0.191047	0	0.0903898	0	0.125253	0.005072	0.0541129	0	0.0230916	0	0.0943958	0	0.22626	0.0927774	0.0355463	0	0	0.019202	0	0	0	0	0.58128	0.82075
GSM274962	0.123996	0.0701662	0	0.0906224	0	0.100637	0.0400671	0.148858	0.00717725	0.0172455	0	0.0610718	0	0.231367	0.0649423	0.0234083	0	0	0.0162147	0	0	0.00422561	0	0.592119	0.815913
GSM274966	0.26003	0.407363	0	0.0376445	0	0.0576111	0	0.0373457	0	0	0	0.00318188	5.59e-05	0.10782	0.0360155	0.0351563	0	0.00328167	0	0.0144944	0	0	0	0.508961	0.874143
GSM274967	0.232113	0.209825	0.0951897	0.0270204	0	0.0259266	0.00906985	0.112645	0.0147876	0	0	0.00777766	0	0.16289	0.0457818	0.0336793	0	0.0119151	0.0113792	0	0	0	0	0.574184	0.817939
GSM274971	0	0.302911	0.0176838	0.0821723	0	0.0460749	0	0.0802345	0	0	0	0.0754856	0	0.221527	0.0767274	0.0524963	0	0	0.0313232	0	0.0029388	0.0104251	0	0.557373	0.834393
GSM274972	0.103119	0.29331	0.00248767	0.0443883	0	0	0.0769999	0.0436101	0.0131781	0	0.0033693	0.0154998	0.00136351	0.0998565	0.0559135	0.132259	0	0.0986812	0.0149892	0	0	0.000975116	0	0.609862	0.803003
GSM274977	0	0.256313	0	0.129295	0	0	0.0691181	0.13824	0	0.0429938	0	0.0425738	0.0055234	0.137918	0.0584042	0.119577	0	0	0	0	0	4.34e-05	0	0.489692	0.872169
GSM274985	0	0.144016	0.00188688	0.152215	0	0	0.101524	0.0619791	0	0.0261392	0	0.0727285	0	0.168493	0.227525	0.0160674	0	0	0.0264716	0	0	0.000953924	0	0.685218	0.746638
GSM275001	0.206187	0.0251891	0	0.0956048	0	0	0.0527825	0.0854481	0.00925718	0.0760041	0	0.0222513	0	0.218802	0.103472	0.0851815	0	0	0.0137691	0	0.00605162	0	0	0.64131	0.789062
GSM275002	0.314955	0.268314	0	0.082386	0	0	0.0195715	0.111154	0	0.0117595	0	0	0	0.055599	0.0548714	0.0813898	0	0	0	0	0	0	0	0.701237	0.71721
GSM275013	0.00574591	0.50896	0.0307047	0.0467847	0.0166314	0	0.0459176	0.0664143	0.0081835	0.0446104	0.00469031	0.00435145	0	0.0373443	0.0260915	0.15205	0	0.00122095	0.000299464	0	0	0	0	0.662369	0.755044
GSM275016	0	0.51784	0	0.0837492	0	0.00727295	0	0.0443466	0.0182026	0	0	0.0669063	0	0.123889	0.066657	0.0693599	0	0	0.00177678	0	0	0	0	0.476542	0.882332
GSM275019	0.267425	0.117986	0.00443818	0.110965	0	0	0.0219226	0.0831831	0.0274939	0	0	0.0222327	0	0.253771	0.0221383	0.0684441	0	0	0	0	0	0	0	0.607843	0.798688
GSM275029	0.114333	0.0120526	0.0165598	0.147192	0	0.0547913	0.0303502	0.164974	0	0.109457	0	0	0	0.164921	0.107271	0.0780992	0	0	0	0	0	0	0	0.529893	0.849608
GSM275039	0.308638	0.189062	0	0	0	0	0.0507774	0.0682522	0.00268188	0.0129414	0.0750754	0	0	0.0661224	0.0147648	0.115789	0	0.00669192	0.0455489	0	0.0240182	0.0196358	0	0.441874	0.901033
GSM275041	0.0782973	0.429542	0	0.0652391	0	0	0.0205273	0.071657	0	0.0319371	0	0.0450331	0	0.13572	0.0855173	0.0261994	0	0	0.0103304	0	0	0	0	0.598621	0.801404
GSM275047	0.0564249	0.166015	0	0.0824715	0	0	0.0562183	0.0474909	0.00124862	0.0332546	0	0.0012975	0	0.348982	0.0885444	0.0978273	0	0	0.0172496	0	0	0.00297552	0	0.489037	0.871637
GSM275056	0.254639	0.197497	0.0638784	0.0582727	0	0	0	0.0775209	0.0290509	0.0255607	0	0.0569697	0	0.0929475	0.0407738	0.0833282	0	0	0	0.00769862	0.00580434	0.00605787	0	0.636387	0.773839
GSM275058	0.00287646	0.291805	0	0.109297	0	0.143762	0.085194	0.0409555	0	0.0576734	0	0	0	0.171083	0.0651407	0.0322133	0	0	0	0	0	0	0	0.551548	0.838144
GSM275060	0.0771652	0.140665	0.130282	0.0378557	0	0	0.0375885	0.0720506	0.024537	0	0.00696234	0.0259614	0	0.32863	0.0294861	0.0588663	0	0.00911545	0.0153644	0	0.00547003	0	0	0.575753	0.820017
GSM275062	0.191828	0.373374	0	0.0495779	0	0.0474283	0.027138	0.108712	0	0.0138301	0.0211385	0	0	0.07227	0.0510886	0.0295924	0	0	0	0.00813223	0	0.00588975	0	0.590355	0.806376
GSM275065	0.249813	0	0	0.0768268	0	0.0458861	0.0365494	0.102633	0	0.0375937	0	0.00851937	0	0.204688	0.126436	0.0908594	0	0	0	0.0128657	0	0.00732926	0	0.515896	0.857183
GSM275071	0	0.26789	0	0.0434037	0.0227494	0	0.00356926	0.0684755	0.00202224	0.129297	0	0.0675868	0	0.291988	0.0753285	0.0235539	0.00244372	0	0	0.00169245	0	0	0	0.468438	0.882785
GSM275072	0	0.282347	0	0.103444	0.0216356	0	0.0680808	0.00105207	0	0.0354901	0	0.0319629	0	0.282251	0.129231	0.0214946	0	0	0.0202867	0	0	0.00272364	0	0.552203	0.836036
GSM275073	0.0439558	0.0840635	0.0715143	0.140284	0.0308893	0	0.18112	0.0846333	0	0.0165429	0.0123278	0.026386	0.0114058	0.0158441	0.147328	0.0806348	0	0	0.046308	0	0.00676237	0	0	0.60409	0.811118
GSM275074	0.093714	0.313699	0.0185678	0.0788342	0	0.0158588	0.119563	0.0464115	0	0	0.0386562	0	0	0.150572	0.0340303	0.0330113	0	0.0446056	0.011702	0	0	0.000773972	0	0.581854	0.81814
GSM275088	0	0.38134	0	0.0235409	0.103763	0	0.0715019	0.0246114	0	0.0766565	0	0.0186579	0	0.156306	0.0454399	0.00874228	0	0.0313747	0.0487287	0	0	0.00933692	0	0.572277	0.82627
GSM275096	0.16045	0.0536369	0	0.137567	0	0	0.141386	0.111008	0	0.110207	0	0	0	0.132334	0.0994018	0.050241	0	0	0.0037688	0	0	0	0	0.457618	0.888289
GSM275098	0.171466	0.366914	0.0508901	0.0803735	0	0	0.0592407	0.0263743	0	0.0322703	0.00566836	0	0	0.103595	0.0382027	0.0631647	0	0	0.00184033	0	0	0	0	0.582066	0.812518
GSM275100	0.166416	0.108612	0.0466866	0.109464	0	0	0.133552	0.0352993	0	0.0727267	0.0198844	0	0	0.136823	0.0929142	0.0689034	0	0	0	0	0.00871911	0	0	0.463843	0.88506
GSM275108	0.0663498	0.242095	0	0.0652038	0	0	0.0527662	0.0645976	9.45e-07	0.0234595	0.0260241	0	0.00470358	0.0935542	0.222407	0.122497	0	0	0.0163408	0	0	0	0	0.351319	0.949693
GSM275117	0	0.284654	0	0.0824546	0	0	0.0346028	0.104338	0.0144157	0.0759636	0	0.0683458	0	0.169284	0.123041	0.0112354	0.000715737	0	0.0309496	0	0	0	0	0.459089	0.887699
GSM275124	0.113345	0.121554	0	0.0435227	0	0	0.0439793	0.0774459	0.0270387	0.0784053	0	0.00409925	0	0.331237	0.10014	0.0270641	0	0	0.0260303	0	0.00613821	0	0	0.519864	0.854951
GSM275125	0.00358053	0.142062	0	0.0572863	0	0	0.195452	0.0814676	0	0.174006	0	0	0	0.197409	0.0849475	0.0500012	0.000232791	0	0.0135558	0	0	0	0	0.455816	0.889677
GSM275135	0	0.117751	0	0.103227	0	0	0.116917	0.0685312	0	0.110109	0	0	0	0.263611	0.0933452	0.08023	0	0	0.0409455	0	0.00533344	0	0	0.412892	0.910204
GSM275139	0.108604	0.106596	0.0674811	0	0	0.0223324	0.1074	0.107794	0	0.0955718	0	0.015434	0	0.0276167	0.0824977	0.183732	0	0.011887	0.039848	0	0.00754119	0.0156651	0	0.318846	0.952367
GSM275152	0	0.146204	0.0650462	0.171678	0	0	0.203238	0.00260073	0	0.100763	0	0	0	0.0377984	0.0680246	0.104186	0	0.0773273	0.0186237	0	0	0.00451107	0	0.431754	0.901177
GSM275160	0	0.310896	0	0	0	0.035575	0.102359	0.0897832	0	0.0808817	0	0.0108285	0.00846008	0	0.174013	0.091503	0.00975971	0	0.0574352	0	0.0285051	0	0	0.559007	0.833054
GSM275175	0.0355609	0.148401	0.0208369	0.073824	0.0451539	0	0.105565	0.0420127	0	0.0649224	0.0285952	0	0	0.116921	0.137776	0.156035	0	0	0.0164156	0	0	0.00798234	0	0.272728	0.973834
GSM275185	0	0.0135042	0.00481065	0.199291	0	0	0.091086	0.04996	0	0.285337	0	0	0	0.126763	0.113988	0.104351	0	0	0.0109105	0	0	0	0	0.518251	0.854441
GSM275194	0.230918	0.207878	0	0	0.0849745	0	0	0.0262969	0	0.0627594	0	0.011065	0	0.166971	0.108711	0.0839841	0	0	0.016442	0	0	0	0	0.486347	0.873831
GSM275266	0.513209	0.130017	0	0	0.040726	0	0.00561397	0.0357071	0	0.0282766	0	0.0312787	0	0.170586	0.0273418	0.00713309	0	0	0.00401016	0	0	0.00610082	0	0.574362	0.824374
GSM275267	0.0906488	0.157753	0.0027396	0.00738892	0	0.0323441	0.149997	0.0806329	0	0.190133	0	0	0	0.187102	0.0567137	0.0345407	0	0	0.00327682	0	0.00143622	0.0052936	0	0.532786	0.85039
GSM275269	0.0562786	0.4277	0	0	0	0.0731778	0.0454896	0.0137018	0	0.0220557	0	0.018758	0	0.184256	0.0802594	0.00920182	0	0.0157399	0.0504468	0	0.0029347	0	0	0.422665	0.911422
GSM275270	0.0447731	0.0892813	0.0247371	0.00507585	0.172028	0	0.0689775	0.150045	0.028992	0.161833	0	0	0	0.0532774	0.0624817	0.111828	0.0216594	0	0.00295454	0.00205624	0	0	0	0.428094	0.90314
GSM275275	0	0.346153	0.0205256	0.0224861	0.00288714	0	0.137668	0	0	0.0624822	0.023358	0	0	0.193632	0.137541	0.0431868	0	0	0.00963874	0	0.00044251	0	0	0.505317	0.862341
GSM275285	0.0851831	0.11498	0.0022187	0.0897335	0	0	0.0527205	0.0537229	0	0.0872424	0	0.0193484	0	0.341366	0.0772503	0.0620114	0	0	0.0142223	0	0	0	0	0.460598	0.886853
GSM275292	0.0509712	0.223847	0	0.0627512	0.0336664	0.10984	0	0.0165236	0	0	0	0.122562	0	0.181429	0.0645413	0.0467731	0	0	0.0807735	0	0.00632165	0	0	0.38393	0.925157
GSM275293	0.282668	0	0.206509	0.0314967	0	0.0054044	0.0874223	0.0536728	0	0.0149978	0.0365676	0	0.0111505	0.0876686	0.109123	0.0626799	0	0	0	0.00622625	0.00441334	0	0	0.569507	0.821326
GSM275295	0.0949508	0.0600395	0	0.196434	0	0	0.220782	0.0665024	0	0.154072	0	0	0	0.0278562	0.094165	0.0454222	0	0	0.0376535	0	0	0.00212333	0	0.374649	0.931252
GSM275296	0.110729	0.0411396	0.00459501	0.207465	0	0	0.221074	0.0769541	0	0.13878	0	0	0	0.0281504	0.0982072	0.0557318	0	0	0.0171737	0	0	0	0	0.385074	0.926481
GSM275297	0.123828	0.435852	0.0020966	0.0150854	0	0.0377233	0.0432007	0.0519198	0	0.0178544	0.000609826	0	0	0.177894	0.0454549	0.0391918	0	0	0.00928977	0	0	0	0	0.494477	0.872674
GSM275299	0.502028	0.0513734	0.0252634	0.0241858	0	0	0.0121177	0.0537893	0	0.0305547	0	0.0174818	0	0.185879	0.047576	0.0250295	0	0.0168682	0.00785408	0	0	0	0	0.596211	0.80286
GSM275305	0.166953	0.338869	0	0.0747634	0	0.0402764	0.0426635	0.0588551	0	0.0866888	0	0	0	0.096959	0.0307815	0.04634	0.00207693	0.00821029	0.00147449	0	0.00508807	0	0	0.424622	0.913675
GSM1300748	0.353337	0.163779	0	0.0435977	0	0.0458878	0.0118661	0.0373194	0	0	0	0.0652554	0	0.0941694	0.0570398	0.0741223	0	0	0.0536264	0	0	0	0	0.485954	0.87705
GSM1300749	0.00893583	0.698836	0	0.00108571	0.0111029	0	0.0173893	0	0	0.0178116	0	0.0028038	0	0.107517	0.0496138	0.0124833	0	0.0646822	0.00528106	0	0.00245765	0	0	0.630448	0.777149
GSM1300750	0.124148	0.339537	0.0787562	0.0281788	0	0.0544728	0.0573509	0.0209821	0	0	0.0203612	0	0	0.157456	0.0132077	0.062035	0	0.033191	0.0103234	0	0	0	0	0.543655	0.838806
GSM1300751	0.158055	0.197017	0.277462	0.0404807	0	0.0173057	0.0563541	0.0711988	0	0	0	0	0.0112444	0.0697853	0.0285138	0.0341797	0	0.00391931	0.0290159	0	0.00546852	0	0	0.618646	0.787629
GSM274895	0.0101296	0.139572	0.00400707	0.0716197	0	0	0.104516	0.145369	0	0.0720098	0	0.0688586	0	0.097918	0.209727	0.0601388	0	0	0.0132731	0	0	0.00286132	0	0.580909	0.817151
GSM274897	0	0.365433	0	0.0651958	0	0	0.0334525	0.155532	0.0230769	0.050611	0	0.0445418	0	0.0876079	0.0432485	0.113468	0	0	0	0.0178331	0	0	0	0.566886	0.82747
GSM274900	0.0588545	0.489073	0.00682277	0.0656559	0	0.0987686	0	0.0242844	0	0	0	0.0218915	0.0022609	0.153306	0.0259315	0.0120499	0	0.0299086	0.0088318	0	0	0.00236018	0	0.641435	0.768938
GSM274902	0.596538	0	0.0148217	0.0244719	0	0.0246041	0.0206927	0.0590664	0.0212631	0	0.0493184	0	0	0.125506	0.00832422	0.0446109	0	0.00798082	0	0.00280079	0	0	0	0.635768	0.77171
GSM274903	0.301911	0.126002	0.0114651	0.0870556	0	0	0.00546534	0.134772	0	0.0138474	0	0.0248134	0	0.131114	0.0697881	0.0937668	0	0	0	0	0	0	0	0.527665	0.848678
GSM274905	0.148193	0.148709	0.00990571	0.0693359	0	0	0.0570435	0.123634	0	0.0225529	0	0.0132772	0	0.216858	0.0624102	0.0970947	0	0	0	0.0179669	0.00537468	0.00764345	0	0.591526	0.816632
GSM274906	0.0537916	0.515827	0	0.0392086	0.025106	0	0.0105237	0.121754	0	0.062376	0	0.0201621	0	0.0992338	0.0422653	0.00975152	0	0	0	0	0	0	0	0.579187	0.814621
GSM274907	0.247315	0.207132	0.0276141	0.0485355	0	0	0.0014484	0.0761734	0	0.0319169	0	0.0326315	0	0.165653	0.0639837	0.0744345	0	0	0.021014	0	0.00214867	0	0	0.512517	0.858314
GSM274908	0.419487	0.126223	0	0.0623875	0	0.0277734	4.05e-05	0.0778903	0.00271027	0	0	0.0289235	0	0.134858	0.0580988	0.0440684	0	0	0.0175387	0	0	0	0	0.464758	0.895066
GSM274910	0.00594738	0.542893	0	0.048454	0	0	0.00288577	0.0843719	0.0145742	0.0195992	0	0.0347467	0	0.182509	0.0493348	0.0101036	0	0	0.00458021	0	0	0	0	0.543684	0.839245
GSM274911	0	0.225707	0	0.0890521	0.0283166	0	0.0176221	0.0572126	0	0.0455698	0	0.111174	0	0.195928	0.0921078	0.0426035	0.00779107	0	0	0.0751426	0.00553523	0.00623765	0	0.419925	0.908076
GSM274912	0	0.25902	0	0.0815011	0	0.0799996	0.00196907	0.0523869	0	0.0563024	0	0.0775716	0	0.256983	0.0897623	0.0334903	0	0	0.0110133	0	0	0	0	0.549576	0.838013
GSM274913	0.361758	0.00744673	0.00158877	0.0154537	0	0	0.0217659	0.320753	0.0139943	0.041115	0	0.0385494	0	0.0552478	0.0436142	0.0463653	0	0.0207129	0.0116352	0	0	0	0	0.537577	0.842531
GSM274915	0.11293	0.129849	0	0.041119	0	0	0.0581491	0.138453	0	0.0682153	0	0.0581116	0	0.197751	0.143892	0.0501901	0	0	0	0.00134005	0	0	0	0.608866	0.803982
GSM274916	0.218513	0.325416	0.113038	0.0295307	0	0	0.0115271	0.0523575	0	0.0230949	0	0.0101051	0	0.0929327	0.0612686	0.0556529	0	0	0.00656314	0	0	0	0	0.503665	0.876702
GSM274918	0.0550065	0.528874	0	0.0029756	0.0262855	0	0.00538145	0.0867711	0	0.0204399	0	0.0269541	0	0.0718961	0.105261	0.0516558	0	0	0.0184982	0	0	0	0	0.558219	0.83005
GSM274920	0.140909	0.208357	0.0108662	0.0284295	0	0	0.0250384	0.111779	0	0.0614636	0	0.0352645	0	0.245478	0.037866	0.0745159	0	0	0.0200332	0	0	0	0	0.558917	0.832042
GSM274921	0.364855	0.221254	0	0.0647505	0	0	0.0759144	0.0613576	0	0.0325251	0	0.00499426	0	0.0811441	0.0481628	0.0450423	0	0	0	0	0	0	0	0.717308	0.70328
GSM274922	0.421669	0.312716	0	0.0131908	0	0.00424698	0	0.0812883	0	0	0	0.0604785	0	0.0230388	0.0156072	0.0496667	0	0	0.0180978	0	0	0	0	0.614894	0.79719
GSM274923	0.0419654	0.0803523	0	0.146344	0	0	0.0662064	0.121949	0.00641255	0.0712018	0	0.024739	0	0.200007	0.112103	0.113742	0.000718486	0	0.0142586	0	0	0	0	0.606413	0.810492
GSM274924	0.257239	0.0936912	0	0.127487	0	0	0.118417	0.100887	0	0.0436783	0	0	0	0.0279964	0.087961	0.112653	0	0	0.0296786	0	0	0.000311507	0	0.602807	0.806609
GSM274925	0.152982	0.352078	0.00140311	0.0395185	0	0.0394177	0.0125746	0.0590161	0	0	0	0.0237602	0	0.269269	0.0253374	0.0130438	0	0.00240705	0.00919245	0	0	0	0	0.558806	0.828601
GSM274926	0.135066	0.0876863	0.044087	0.0958735	0	0	0.0908793	0.0877898	0	0.0646131	0	0	0	0.139404	0.135597	0.0790538	0	0	0.0242295	0	0	0.0157213	0	0.640142	0.79103
GSM274928	0.0197245	0.107128	0	0.0449227	0.00374822	0	0.0376618	0.149413	0.00205502	0.1322	0	0.0515178	0	0.198866	0.141299	0.0814448	0	0	0	0.0192316	0	0.0107883	0	0.49387	0.869182
GSM274930	0.15546	0.403296	0	0.085697	0	0.0162791	0	0.0774089	0.0347259	0	0	0.020418	0	0.145327	0.0306485	0.0275483	0	0	0	0	0	0.00319133	0	0.623342	0.781752
GSM274933	0.194746	0.100833	0	0.107394	0	0	0.140555	0.174644	0	0.0389116	0	0.0375926	0	0.0764947	0.0549688	0.073859	0	0	0	0	0	0	0	0.672775	0.765419
GSM274934	0.0808514	0.0415104	0.0170576	0.282442	0	0	0.13043	0.089849	0	0.0693652	0	0	0	0.0763359	0.0618816	0.142336	0	0	0.0042213	0	0	0.0037186	0	0.497634	0.867797
GSM274935	0.0115672	0.0946146	0	0.0622133	0	0.105544	0.0383877	0.103182	0	0.158405	0	0.0225312	0	0.178785	0.191679	0.0156317	0	0	0.0162821	0	0	0.00117761	0	0.526879	0.84961
GSM274938	0.153784	0.109642	0.0210345	0.163858	0	0	0.0974184	0.076954	0	0.058217	0	0.00343897	0	0.126473	0.0980313	0.0851095	0	0	0	0	0	0.00603839	0	0.58786	0.818685
GSM274939	0.107734	0.285074	0	0.0471373	0.00414606	0	0.104493	0.0946345	0	0.0490539	0	0.0337032	0	0.100268	0.0993512	0.0498215	0	0	0.0245833	0	0	0	0	0.506582	0.861561
GSM274940	0.0147596	0.387664	0.0644727	0.0783542	0	0.0107387	0	0.0971497	0.00269221	0	0	0.0844391	0	0.0956043	0.0573305	0.075966	0	0	0.0218211	0	0	0.00900758	0	0.501837	0.864491
GSM274941	0.192896	0	0.0508276	0.109086	0	0	0.176612	0.0770293	0	0.0738326	0	0.0082845	0	0.0975821	0.117823	0.0822139	0	0	0.00959118	0	0	0.00422188	0	0.574789	0.827718
GSM274943	0.119183	0.200067	0.161766	0.0818398	0	0.0246095	0.0725839	0.0758559	0	0	0.0271844	0	0	0.0970444	0.0697751	0.0635823	0	0	0.00650934	0	0	0	0	0.682485	0.742665
GSM274944	0.0174381	0.260589	0	0.0422218	0.0461547	0	0.0882157	0.024061	0.00134426	0.112481	0.00194664	0	0	0.191123	0.116172	0.0787418	0	0	0	0.00406326	0.00245066	0.0129968	0	0.557484	0.836113
GSM274945	0.13481	0.461736	0	0.0402751	0.0389118	0	0.107157	0.0537872	0	0.0197753	0.0392443	0	0	0.00820635	0.0511446	0.0174461	0	0	0.0217666	0	0.00258694	0.00315232	0	0.63557	0.771699
GSM274947	0	0.637024	0	0.0626468	0	0	0.00458453	0.0580406	0	0.0387423	0	0.0151805	0	0.107061	0.0269694	0.0489484	0	0	0.000801586	0	0	0	0	0.455577	0.907063
GSM274948	0.182518	0.339161	0	0.118297	0.0144562	0	0.0193292	0.0285043	0	0	0.0496649	0.00383745	0.0351449	0.0195966	0.122326	0.0619921	0	0	0.00160131	0	0.00357094	0	0	0.497734	0.870361
GSM274949	0.252911	0	0.0185935	0.188381	0	0.0192842	0.00353419	0.0471645	0	0.0280544	0	0.0519462	0	0.288204	0.076369	0.0204155	0	0	0.00514215	0	0	0	0	0.503269	0.863346
GSM274950	0.0759577	0.466204	0	0.0226097	0	0	0.0304935	0.0235705	0	0	0	0.0385241	0	0.234837	0.0640843	0.0116018	0	0.0153264	0.0167916	0	0	0	0	0.549417	0.835209
GSM274951	0.105145	0.239648	0	0.0468763	0	0.033426	0.084816	0.0974094	0.00393182	0.0705803	0	0.124135	0	0.114998	0.0316825	0.028934	0	0	0.0184165	0	0	0	0	0.449566	0.893961
GSM274952	0.0793875	0.131223	0.0150267	0.0834773	0	0.0920989	0.0254056	0.0164421	0	0.0434432	0	0.0379414	0.00472349	0.303388	0.113159	0.0240814	0	0	0.0302024	0	0	0	0	0.640236	0.786548
GSM274953	0.117623	0.265061	0.0805401	0.0533629	0	0.0380869	0.0285283	0.0376096	0	0	0	0.0338723	0	0.22741	0.0530198	0.0340783	0	0	0.0265471	0	0	0.0042614	0	0.521513	0.852471
GSM274954	0	0.679899	0	0.0356721	0.00925874	0	0.033649	0.0555709	0	0	0.0178859	0	0.00209664	0.083614	0.040596	0.0371916	0	0.00456579	0	0	0	0	0	0.559333	0.834326
GSM274955	0.0275141	0.0341479	0	0.0513099	0	0	0.0796501	0.131419	0.0265725	0.118558	0	0.0558344	0	0.217697	0.163585	0.0821714	0	0	0	0.00453663	0	0.00700441	0	0.623457	0.793258
GSM274956	0.229671	0.237125	0	0.0847965	0	0.0244388	0.0254236	0.0663644	0.0102854	0	0	0	0	0.229357	0.0424183	0.0501189	0	0	0	0	0	0	0	0.542979	0.838948
GSM274957	0	0.482752	0.0681526	0.0337404	0.0196019	0.103464	0.000519804	0.02214	0	0	0	0.0245691	0	0.107605	0.0534388	0.0809832	0	0	0	0	0	0.00303399	0	0.688325	0.733808
GSM274958	0	0.416199	0	0.036103	0.0579073	0	0.0348182	0.0799159	0.00173595	0.018688	0	0.0605916	0	0.092744	0.0743765	0.067082	3.11e-05	0	0.0530736	0	0.00659295	0.000140366	0	0.56773	0.826122
GSM274959	0	0.011212	0.0119408	0.169504	0	0	0.135949	0.0796795	0	0.162827	0	0.0289216	0	0.140432	0.107679	0.137729	0	0	0.00822265	0	0.00590289	0	0	0.598481	0.810613
GSM274960	0.365192	0.127294	0	0.0270226	0	0.0606283	0.0411478	0.0316429	0.00755446	0	0.0256696	0.0114776	0	0.191095	0.0392289	0.0524544	0	0.0161075	0.00348531	0	0	0	0	0.553756	0.831869
GSM274961	0.346525	0.312496	0	0.0434984	0	0	0.0406427	0.0536051	0	0	0.0631058	0	0	0.0151012	0.0205371	0.0946268	0	0	0	0.00279965	0.00706246	0	0	0.491445	0.887077
GSM274964	0.224786	0.161824	0	0.0676155	0	0	0.0760848	0.0877387	0	0	0	0.0440015	0	0.128154	0.0818844	0.0647661	0	0	0.0549825	0	0	0.00816267	0	0.530961	0.848072
GSM274965	0.142572	0.3728	0	0.071659	0	0.0447287	0.0607695	0.147376	0	0.0224252	0	0	0.00129139	0	0.0497348	0.084027	0	0	0.00182029	0	0	0.000795855	0	0.441826	0.905729
GSM274968	0.0201761	0.187385	0.047828	0	0.137063	0.000600241	0.0614773	0.0390094	0	0.0669224	0	0	0	0.205703	0.133449	0.0753878	0	0	0.016009	0	0	0.00898911	0	0.640758	0.790347
GSM274969	0.00416418	0.489995	0	0.0134545	0.0559924	0	0.0214502	0.0906392	0	0.029763	0	0.03412	0	0.143944	0.0803328	0.0268849	0	0	0.00925941	0	0	0	0	0.516712	0.855731
GSM274970	0	0.502881	0.0355189	0.0375309	0.000826011	0	0.0369845	0.00449248	0	0	0	0.0537124	0	0.214878	0.0112307	0.0333552	0	0.0399312	0.0229613	0	0.00219205	0.00350487	0	0.505898	0.86386
GSM274973	0.0430624	0.175064	0	0.187193	0	0.0223508	0.127275	0.0440828	0	0.0358274	0	0.0357611	0	0.21705	0.0563831	0.0456965	0	0	0	0.00140714	0.00884623	0	0	0.488563	0.872762
GSM274974	0.0501289	0.317573	0	0.0449933	0	0	0.0157537	0.120376	0.00952361	0.0328664	0	0.00447449	0.00738708	0.0967939	0.0809047	0.179208	0	0.037441	0	0	0.00257528	0	0	0.524771	0.852044
GSM274975	0.0990936	0.132688	0	0.127551	0	0	0.024579	0.129085	0.00420275	0.085591	0	0.0624408	0	0.125035	0.102209	0.085882	0.00744115	0	0.0142008	0	0	0	0	0.524336	0.852971
GSM274978	0.11992	0.164432	0	0.0384994	0	0.0865906	0.0702628	0.0398415	0.00183337	0.0259118	0	0.115105	0	0.162758	0.0806932	0.0349104	0	0	0.0558029	0	0.00343862	0	0	0.47268	0.880464
GSM274979	0	0.759443	0	0.00901388	0.0082173	0.0114768	0.00967136	0.0120902	0	0.00738656	0	0.017824	0	0.0838961	0.0416217	0.0248084	0	0.0103758	0.00230079	0	0	0.00187372	0	0.738563	0.67375
GSM274980	0.048626	0.353973	0	0.0159391	0	0.0197386	0.102826	0.0765858	0	0.026704	0	0.0156008	0	0.0639103	0.143611	0.0965897	0.00927117	0	0.0258483	0	0	0.000776259	0	0.459858	0.887825
GSM274981	0.095145	0.212442	0	0.0125855	0	0	0.0749381	0.0475811	0	0.0614128	0.0270576	0	0	0.235341	0.16883	0.0464651	0	0	0.00745048	0	0.0107516	0	0	0.667632	0.763888
GSM274983	0.135633	0.341763	0	0.0518551	0	0.0317782	0.0238588	0.0599873	0	0.00592003	0.00377174	0.00785946	0	0.228887	0.0787505	0.0126908	0	0	0.0172447	0	0	0	0	0.541196	0.840084
GSM274984	0.0760045	0.0842914	0.0243101	0.0596375	0	0.0203101	0.0385272	0.0937419	0	0.0895068	0	0.0238521	0	0.160055	0.186916	0.106822	0	0	0.0266833	0	0.00934127	0	0	0.570252	0.826945
GSM274986	0.320118	0.07233	0.00512736	0.152281	0	0	0.036564	0.127311	0.000947531	0.0620575	0	0.000863895	0	0.0667022	0.06821	0.0874885	0	0	0	0	0	0	0	0.6369	0.778506
GSM274987	0.148173	0.226043	0	0.0527887	0	0.102986	0.0476876	0.0988996	0.029076	0	0	0	0.0141629	0.108574	0.066356	0.10249	0	0	0.00108791	0	0.00167541	0	0	0.509203	0.860219
GSM274988	0.261814	0.254115	0	0.0364454	0	0.0274649	0.00633297	0.00493898	0	0.00347912	0.00143833	0	0	0.208838	0.0914001	0.0873077	0	0	0.0164248	0	0	0	0	0.586412	0.809284
GSM274989	0	0.289788	0	0.100553	0	0	0.134439	0.0951272	0.00490242	0.0600581	0	0.0062584	0	0.116266	0.0987565	0.0764409	0.0110175	0	0.00639239	0	0	0	0	0.539486	0.846563
GSM274990	0.141444	0.0892186	0	0.145863	0	0.0243299	0.0380866	0.187766	0	0.0992799	0	0.00099823	0	0.101399	0.0840828	0.0867497	0	0	0	0	0	0.00078282	0	0.565045	0.829495
GSM274992	0.162944	0.296773	0.133185	0.0287468	0.00571115	0	0.0318966	0.0189284	0	0.0255917	0.00435498	0	0	0.148954	0.0654493	0.0667494	0	0	0.0107156	0	0	0	0	0.635628	0.771592
GSM274993	0.164272	0.153636	0	0.0435424	0	0.182189	0.0175232	0.235141	0.0132187	0	0	0.00737236	0	0.102519	0.0296666	0.0318171	0	0.0135194	0.00558186	0	0	0	0	0.546111	0.837407
GSM274994	0.125295	0.359754	0	0.0938794	0	0	0.104982	0.0412795	0	0	0	0.0314867	0	0.174747	0.0175014	0.0323227	0	0.00487601	0.0138763	0	0	0	0	0.535005	0.84416
GSM274995	0.182281	0.169602	0	0.055613	0	0	0.202817	0.0901756	0	0	0.018832	0	0.00996043	0	0.0930968	0.0853274	0	0	0.0678135	0	0.0150052	0.00947654	0	0.497635	0.86758
GSM274996	0.126051	0.472979	0	0	0	0.11105	0.0144195	0.047217	0	0	0.00284	0.037693	0	0.0933222	0.0148983	0.0435343	0	0.0119529	0.0223203	0	0.00172269	0	0	0.536349	0.846118
GSM274997	0.00924227	0.0368666	0.0571622	0.0749612	0.000732385	0	0.0464898	0.0403382	0.0316486	0.0545751	0	0.0168901	0	0.369472	0.132492	0.110085	0	0	0.00734843	0	0.00451242	0.00718455	0	0.614748	0.796375
GSM274998	0.503252	0	0.001693	0.00631856	0	0.0163748	0.0300114	0.0881176	0.00847345	0	0.0415587	0	0	0.203477	0.0542614	0.0464621	0	0	0	0	0	0	0	0.63565	0.772792
GSM274999	0.332346	0.063387	0	0.0208569	0	0	0.0722645	0.0712564	0	0.0480463	0	0	0	0.283226	0.0329954	0.0669886	0	0	0	0	0.00863281	0	0	0.586938	0.811769
GSM275000	0.0642269	0.118151	0.00436071	0.0501829	0	0	0.00929393	0.171805	0.0411474	0.0660372	0	0.0451758	0	0.281505	0.0455043	0.0788763	0	0	0.0237331	0	0	0	0	0.597726	0.813737
GSM275003	0	0.439392	0.139308	0.0439033	0	0.0903984	0.00825478	0.00202175	0	0	0	0.0129258	0	0.19335	0.0449415	0.0140113	0	0	0.0114924	0	0	0	0	0.552682	0.834298
GSM275004	0.0860857	0.288071	0.00425711	0.103205	0.00189206	0	0.00976402	0.128773	0	0.0681733	0	0.0303125	0	0.129682	0.0941125	0.0504621	0	0	0.00520936	0	0	0	0	0.608159	0.800485
GSM275005	0.0761037	0.162742	0.0195971	0.13577	0	0.00720039	0.0399047	0.146718	0	0.0596194	0	0.011939	0	0.181086	0.0922401	0.0481118	0	0	0	0.0139606	0.00500724	0	0	0.523647	0.853608
GSM275007	0.149937	0.238041	0	0.0694462	0	0.0762269	0.0165853	0.0506067	0	0.00629414	0	0.0450343	0	0.29831	0.0308253	0.0180924	0	0.000601303	0	0	0	0	0	0.547211	0.836863
GSM275008	0.375982	0.207679	0	0.0620471	0	0	0.0219845	0.0580193	0.00290138	0	0.0185324	0	0	0.079786	0.0692666	0.103803	0	0	0	0	0	0	0	0.457776	0.902289
GSM275009	0.0922439	0.110365	0	0.0994134	0	0	0.00377027	0.12367	0.036922	0.10508	0	0.0669651	0	0.148697	0.072138	0.0585628	0.00364563	0	0	0.0657469	0.00738507	0.00539383	0	0.498328	0.86708
GSM275010	0.414776	0.21827	0	0.0442688	0	0	0.0147048	0.00439739	0.00228635	0	0.0213547	0	0.00177167	0.116176	0.0340939	0.105322	0	0.0138818	0.00869601	0	0	0	0	0.612514	0.790596
GSM275011	0.0374926	0.381302	0.0733985	0.085779	0	0.0341534	0	0.0757971	0.00183822	0.0971555	0	0.0225334	0	0.0957588	0.0631709	0.0316211	0	0	0	0	0	0	0	0.548733	0.835208
GSM275014	0.315032	0.0800163	0	0	0	0.0311873	0.169607	0.0193111	0	0.00572245	0.0046671	0.0166397	0.00692273	0.0533127	0.09965	0.131723	0	0	0.0151132	0	0.0403743	0.0107207	0	0.544238	0.840073
GSM275015	0.038391	0.410345	0	0.0923891	0	0	0.0332333	0.147981	0	0.0184864	0	0	0	0.149266	0.0455293	0.0597706	0	0	0	0.00460821	0	0	0	0.65042	0.769828
GSM275017	0.224874	0.192518	0.10654	0.0257293	0.0142736	0	0.0460853	0.120375	0	0.056865	0	0.0174083	0	0.0848008	0.0464315	0.0631935	0	0	0.00090586	0	0	0	0	0.695194	0.728869
GSM275018	0.222812	0.336094	0.019518	0.0335823	0	0.0528836	0.00573826	0.0559618	0	0	0	0.0298353	0	0.157897	0.0233696	0.0414091	0	0.0116055	0.00881025	0	0	0.000483978	0	0.538532	0.843995
GSM275020	0.0501605	0.189205	0	0.108162	0	0	0	0.129298	0.00796778	0.0355063	0	0.115217	0	0.175845	0.112292	0.0419482	0.00568958	0	0.0287076	0	0	0	0	0.553886	0.835569
GSM275022	0	0.534386	0	0.0853246	0	0	0.0676733	0.0285537	0.00139388	0	0	0.0821103	0	0.122566	0.0258227	0.0339435	0	0	0.0177422	0	0.000483922	0	0	0.61931	0.786136
GSM275023	0	0	0.422453	0.0253358	0	0.0278888	0.0157071	0.0472205	0.00385809	0	0	0.135329	0	0.0748431	0.0270771	0.182089	0	0	0.0343564	0	0.00111048	0.00273152	0	0.494581	0.885279
GSM275025	0.0591288	0.566455	0.00414581	0.043381	0	0	0.0773538	0.0173906	0	0	0	0.0409964	0.00488648	0.0421	0.0243378	0.0204335	0	0.0791534	0.0161716	0	0.00406599	0	0	0.5393	0.845285
GSM275026	0	0.00975959	0.00271124	0.162152	0	0	0.140709	0.0915517	0	0.180718	0	0.0117295	0	0.124369	0.168834	0.0903283	0	0	0.0141966	0	0	0.00294062	0	0.483821	0.87452
GSM275027	0.105202	0.420773	0	0.0681958	0	0.0125311	0.105831	0.0276749	0	0	0	0.00928245	0.00701709	0.0866423	0.0457694	0.0529746	0	0.0207093	0.0196223	0	0.0177742	0	0	0.408517	0.922057
GSM275028	0.373721	0.248263	0	0.0673996	0	0	0.0548991	0.0613198	0	0	0.00521294	0	0	0.0270081	0.0952757	0.0556344	0	0	0.0101029	0	0	0.0011639	0	0.667313	0.744413
GSM275030	0.0141465	0.121498	0.0494665	0.136887	0	0	0.115277	0.0970539	0	0.062088	0	0.00437002	0.0100521	0.0773956	0.147694	0.150097	0	0	0.0139731	0	0	0	0	0.557905	0.837671
GSM275031	0.0868778	0.257222	0	0.109059	0	0	0.0742518	0.139535	0	0.146586	0	0.00639077	0	0.0557968	0.061295	0.0434609	0	0	0.0174768	0	0.00204912	0	0	0.540202	0.841943
GSM275032	0	0.380072	0.00182832	0.0188289	0	0	0.0741541	0.035	0	0	0.0285983	0	0.00863922	0.0675579	0.100118	0.14735	0.00808328	0	0.0551503	0	0.0642751	0.0103454	0	0.499651	0.866573
GSM275033	0.0565632	0.0405995	0.00176156	0.169744	0	0	0.145375	0.0911647	0	0.122358	0	0.054825	0	0.113927	0.123796	0.0697903	0	0	0.00382581	0	0	0.00627032	0	0.486711	0.872787
GSM275034	0.0205466	0.405972	0	0.026022	0	0.0682562	0.055047	0.0526992	0	0.0503361	0	0.0217843	0	0.190565	0.0465795	0.0593164	0	0	0.00287539	0	0	0	0	0.471388	0.881648
GSM275035	0.223022	0.157343	0	0.06538	0	0.00610704	0.148976	0.160377	0	0.0200991	0.0187024	0	0	0.0672645	0.0513304	0.0776144	0	0	0.00378369	0	0	0	0	0.634005	0.785892
GSM275036	0.235011	0	0.0200595	0.0408732	0	0.0369814	0.0976524	0.0871995	0	0.0989174	0.00398094	0	0	0.177789	0.09316	0.103614	0	0	0	0	0.00476113	0	0	0.394316	0.919489
GSM275037	0.0331468	0.0497817	0	0.126769	0	0	0.162288	0.0922544	0	0.0755739	0	0	0	0.193363	0.151794	0.0678999	0	0	0.0379128	0	0.00921574	0	0	0.629013	0.798478
GSM275040	0.149389	0.25004	0	0.0675134	0	0	0.0397435	0.0763484	0.00125085	0.00555827	0	0	0	0.145851	0.130427	0.0927015	0	0.0211536	0.0200235	0	0	0	0	0.446777	0.895622
GSM275042	0	0.321923	0	0.142978	0	0	0.0440055	0.0685706	0	0.0928871	0	0.0565684	0	0.11757	0.0525052	0.0858734	0.0160214	0	0	0.00109755	0	0	0	0.560602	0.831651
GSM275044	0.0196501	0.0387428	0.0108734	0.0836809	0	0	0.0876345	0.159632	0	0.132766	0	0.0271763	0	0.223878	0.152954	0.0524263	0	0	0	0.00754288	0	0.00304241	0	0.666432	0.768026
GSM275045	0.00295465	0.472973	0	0	0.0251614	0.0289374	0.0284466	0.0258349	0	0.0278852	0	0.0520591	0	0.157434	0.0548126	0.0188694	0	0.057548	0.0340956	0	0.0028308	0.0101578	0	0.401097	0.922856
GSM275046	0.104881	0.356475	0	0.0747489	0	0	0.0125913	0.133012	0	0.0487718	0	0.0184752	0	0.0744818	0.0866124	0.0654962	0.00931427	0	0.0151402	0	0	0	0	0.37646	0.938158
GSM275048	0.0773796	0.337748	0	0.00786007	0	0.0678622	0.0339644	0.016683	0	0	0.0246474	0.00438921	0	0.319757	0.0454502	0.0397601	0	0.0213622	0.00313671	0	0	0	0	0.42736	0.908413
GSM275049	0.0794987	0.258266	0	0.210142	0	0	0.167199	0.0526165	0	0.0487217	0	0.0325255	0.00247553	0	0.0698708	0.0493979	0.00388386	0	0.0166391	0	0.0027971	0.00596638	0	0.394526	0.92373
GSM275051	0.118248	0.220921	0	0.0970659	0	0	0.035192	0.0875671	0	0	0	0.0537556	0	0.212223	0.0703725	0.0612014	0	0.011619	0.031834	0	0	0	0	0.49215	0.869969
GSM275052	0	0.437544	0	0.0062737	0	0.0459147	0.0147051	0.208649	0	0.0208505	0	0.0370179	0	0.0936419	0.0541565	0.0683282	0	0	0.0128875	0	0	3.09e-05	0	0.345896	0.953169
GSM275053	0	0.298699	0.00843009	0	0.0485268	0	0.0259868	0.0872601	0.0180793	0.069969	0	0	0	0.259713	0.0938182	0.0708478	0.00295526	0	0.0074267	0	0.00303681	0.00525064	0	0.477345	0.877975
GSM275054	0.269547	0.167471	0.117475	0.0275225	0.0203702	0	0.0105424	0.0867953	0	0.0175859	0	0.0355488	0	0.164956	0.0530751	0.0156858	0	0	0.0125905	0	0	0.000834259	0	0.586705	0.809079
GSM275057	0	0.381448	0	0.00344588	0.0945176	0.109693	0.077615	0	0	0.0388745	0	0.0220584	0	0.114696	0.0638101	0.0529337	0	0	0.0361344	0	0.000392854	0.00438093	0	0.516281	0.857028
GSM275059	0.0378586	0.114899	0.00253932	0.0333023	0	0.0844152	0.127265	0.0829518	0	0.0188922	0.0432923	0	0	0.244751	0.111047	0.0450898	0	0.029716	0	0.00177916	0.00214906	0.0200525	0	0.439377	0.897483
GSM275061	0.099425	0.325921	0	0.165983	0	0	0.116276	0.0504299	0	0	0.0105572	0	0.00981699	0.0272798	0.134164	0.0297064	0	0	0.0299025	0	0	0.000537772	0	0.615997	0.792245
GSM275063	0.264031	0.178342	0	0.0765859	0	0	0	0.080334	0.00160371	0	0	0.0854429	0	0.153727	0.0893203	0.0461475	0	0	0.0244663	0	0	0	0	0.613399	0.792966
GSM275066	0.00314548	0	0.158312	0.304782	0	0	0.128231	0.0395135	0	0.0893865	0	0.0720242	0	0.0101617	0.0723178	0.0858495	0.0121264	0	0	0.0241499	0	0	0	0.55276	0.833267
GSM275067	0	0.0418694	0	0.284775	0	0	0.261837	0.0328046	0	0.114534	0.00557889	0.0271396	0	0.0655977	0.0886875	0.0673598	0	0	0.00499171	0	0	0.00482418	0	0.56517	0.826799
GSM275069	0.171586	0.373995	0	0.0489361	0	0.0388602	0.0407161	0.0749038	0	0.0467348	0.0127337	0	0	0.093164	0.0573715	0.0409987	0	0	0	0	0	0	0	0.54491	0.838304
GSM275070	0.00808614	0.0683375	0.00710307	0.1502	0	0	0.188242	0.0655124	0	0.0473187	0	0.00692825	0	0.0705734	0.208839	0.148582	0	0	0.0179667	0	0.000141453	0.0121696	0	0.595464	0.811435
GSM275075	0	0.365097	0.0104386	0.0539008	0.0691746	0	0.0265627	0.116888	0	0.10807	0	0.0552823	0	0.00947755	0.0918697	0.0508218	0.00292284	0	0.0335036	0	0.00599045	0	0	0.588188	0.811852
GSM275080	0.0924883	0.174753	0.0215311	0.219606	0	0	0.0910339	0.0480498	0	0.114491	0	0.00602579	0	0.0353477	0.0519169	0.135838	0	0	0.00765267	0	0	0.00126544	0	0.530091	0.84925
GSM275084	0.095262	0.302308	0.122357	0.027657	0.0420968	0	0.00995224	0.053405	0.00549685	0.0815509	0	0.0249127	0	0.0811971	0.0761321	0.064513	0	0	0.0115668	0	0.00159188	0	0	0.384517	0.939548
GSM275085	0.00192637	0.115608	0	0.139559	0	0	0.106344	0.0187021	0	0.127334	0	0.00685186	0	0.273012	0.13981	0.032031	0	0	0.0361686	0	0	0.00265319	0	0.595029	0.813485
GSM275087	0.287987	0.338713	0	0.0924116	0	0	0.00529686	0.0427732	0.00912296	0	0.0356801	0	0.0217604	0.0457186	0.00162573	0.11891	0	0	0	0	0	0	0	0.386237	0.955539
GSM275089	0.00790768	0.314273	0	0.0230838	0	0.0637227	0.0662697	0.0275537	0	0.0664961	0	0.0323622	0	0.144744	0.0883705	0.0763438	0	0.069177	0.0115305	0	0.0081649	0	0	0.300775	0.964969
GSM275099	0.068888	0.325773	0	0.0917523	0	0	0.0779359	0.0190592	0	0.0600488	0	0	0	0.198839	0.0799659	0.0586807	0	0	0.0190573	0	0	0	0	0.475247	0.879092
GSM275104	0.0640736	0.105648	0.00578801	0.0629045	0	0	0.15684	0.0727384	0	0.176117	0	0	0	0.203217	0.0927872	0.040738	0	0	0.0191477	0	0	0	0	0.446144	0.894187
GSM275116	0	0.261106	0	0.0220428	0	0.0670331	0.154139	0	0	0	0.000720514	0.046211	0.0728195	0.0647298	0.0556519	0.135273	0	0.000595595	0.0796951	0	0.0142939	0.0256881	0	0.360567	0.932586
GSM275119	0.192451	0.328955	0.0314746	0.0816897	0	0	0.0769196	0.0470247	0	0.0194879	0.0151467	0	0.000845086	0.0256246	0.0810312	0.07311	0	0.0217425	0	0	0.00449724	0	0	0.551954	0.833589
GSM275120	0.204666	0.126678	0.1304	0.174425	0	0	0.0480894	0.0893907	0	0.0153488	0	0	0	0.0986355	0.0564672	0.0386789	0	0	0.0172207	0	0	0	0	0.502325	0.864949
GSM275128	0.128632	0.166303	0	0	0	0.117016	0.0721156	0.0735033	0	0.095149	0	0.0161779	0	0.13069	0.108683	0.0366027	0.0135092	0	0.0359124	0	0.00223305	0.00347349	0	0.439253	0.897528
GSM275130	0.16094	0.501054	0	0.0233939	0	0	0.0375364	0.0395214	0	0.0454136	0	0.022712	0	0.0113228	0.0535164	0.098276	0	0	0	0	0.00589536	0.000418584	0	0.607271	0.795127
GSM275131	0.0147808	0.0930878	0.000524676	0.0919047	0.0478112	0	0.10685	0.0490317	0	0.151616	0	0	0	0.167881	0.161594	0.09807	0	0	0.0124332	0	0.00441542	0	0	0.47342	0.880082
GSM275132	0.0259064	0.0570784	0.0144791	0.244001	0	0	0.189113	0.04977	0	0.152606	0	0	0	0.0360276	0.127681	0.0749276	0.00152624	0	0.0246747	0	0	0.00220944	0	0.489973	0.870918
GSM275133	0.0246216	0.254506	0	0.0720143	0	0.0305832	0.0464327	0.0278942	0	0.0300741	0	0.0249377	0	0.294636	0.0819799	0.0771849	0	0	0.035135	0	0	0	0	0.501064	0.865509
GSM275141	0.311143	0	0.135161	0.053561	0	0.0156923	0.0166496	0.0599951	0	0.0621108	0	0.0406085	0	0.0352074	0.0492879	0.213786	0	0.00408297	0	0	0.00271492	0	0	0.49965	0.866277
GSM275143	0.287429	0.052289	0.17174	0.0346891	0	0.0886274	0.0257286	0	0	0.0213144	0.00239456	0	0.00622085	0.152563	0.118331	0.0254178	0	0.00605342	0.00720212	0	0	0	0	0.522453	0.854928
GSM275145	0	0.302659	0	0.0375196	0.0348639	0	0.0640292	0.0858124	0	0.0907529	0	0.0819928	0	0.109217	0.104962	0.0181547	0.0079193	0	0.0583918	0	0.00118169	0.00254373	0	0.33536	0.9501
GSM275146	0.0987995	0.52245	0	0.0501616	0.0427785	0	0.0118495	0.00803763	0	0.0192548	0	0	0	0.0758671	0.0454911	0.120449	0	0	0	0.0048613	0	0	0	0.44841	0.909344
GSM275150	0.176426	0.0455539	0.0628002	0.196585	0	0	0.024953	0.110298	0	0.0690033	0	0.0588353	0	0.0952103	0.0584161	0.0736463	0	0	0.0216861	0	0.00658557	0	0	0.444162	0.895862
GSM275151	0.0191905	0.384989	0	0.105308	0	0	0.0305045	0.0909812	0	0.0838549	0	0.0470749	0	0.134158	0.0405641	0.0303431	0	0	0.0311418	0	0.00189036	0	0	0.525039	0.850576
GSM275155	0.0343381	0.268508	0.063514	0.0322932	0	0	0.0768542	0.0445819	0	0.0296292	0	0.0623254	0	0.245331	0.0638465	0.0268093	0	0.0128845	0.0390851	0	0	0	0	0.441254	0.897268
GSM275161	0.557823	0.0605929	0.0691431	0	0	0.0750295	0.00663073	0.0272282	0.000477341	0.0130103	0	0.0013245	0	0.117947	0.00905779	0.0464157	0	0.00126155	0.0140591	0	0	0	0	0.610125	0.798002
GSM275179	0	0.555755	0	0.0446991	0	0	0.109116	0.0091874	0	0.0842267	0	0	0	0.0925396	0.05521	0.03047	0	0	0.0187963	0	0	0	0	0.6565	0.758846
GSM275184	0	0.386952	0	0.00657716	0.0587396	0	0.0275841	0.0289896	0.0164053	0.0224626	0.0043578	0.00706641	0	0.295794	0.0838926	0.0295453	0	0	0.0286529	0	0	0.00298026	0	0.525398	0.850482
GSM275191	0.0375828	0.201102	0	0.0200015	0	0.100457	0.0441813	0.0520451	0	0.106627	0	0.0661343	0	0.178638	0.085488	0.0700193	0.000914523	0	0.0297543	0	0.00705508	0	0	0.270539	0.977185
GSM275199	0.0173247	0.346321	0	0.0362292	0	0	0.126079	0.0347521	0	0.0783934	0	0	0	0.301436	0.0450513	0.000774217	0	0	0.013639	0	0	0	0	0.51116	0.859428
GSM275207	0.182663	0.0554773	0	0.0533511	0.00288102	0.0195673	0.168712	0.0261607	0	0.157419	0	0.0251552	0	0.0909322	0.074256	0.105003	0	0	0.0384223	0	0	0	0	0.433856	0.900105
GSM275212	0.0922782	0.269995	0	0.0708118	0	0.0121913	0.0967378	0.0276705	0	0.0342867	0.0353687	0	0	0.212074	0.0939596	0.0287215	0	0	0.0232896	0	0	0.00261547	0	0.492601	0.869653
GSM275213	0.017245	0.314619	0	0.0404681	0.0675731	0	0.00997731	0.00546649	0	0	0	0.0130305	0	0.456886	0.0398833	0.0154734	0	0	0.0193785	0	0	0	0	0.585827	0.811127
GSM275216	0.114581	0.105197	0.0275142	0.120979	0	0.0498327	0.149241	0.0594149	0	0.0366072	0.0288421	0.0125149	0	0.0545249	0.138912	0.0718804	0	0	0.0271218	0	0	0.00283657	0	0.455559	0.889343
GSM275217	0.261197	0	0.0603286	0.11541	0.00221061	0	0.0417664	0.0534477	0.0142688	0.0748076	0	0	0	0.14011	0.0509509	0.182252	0	0	0.00325129	0	0	0	0	0.432465	0.901392
GSM275220	0.0237158	0.211181	0	0.0260011	0.0683384	0	0.087034	0.0229232	0	0.0980274	0	0	0	0.252146	0.168308	0	0	0	0.0423253	0	0	0	0	0.565717	0.82925
GSM275221	0	0.358201	0.00642218	0.0258923	0	0	0.0307271	0.043186	0.0204955	0	0.0201634	0	0	0.308627	0.103786	0.0599515	0	0.0101773	0.0123646	0	5.66e-06	0	0	0.442865	0.898143
GSM275226	0.235411	0.110861	0.0045358	0.0574745	0	0	0.107293	0.0515711	0	0	0.0873135	0	0	0.20981	0.0750242	0.0424032	0	0	0.0124785	0	0	0.0058251	0	0.417799	0.909317
GSM275227	0.0516098	0.200578	0.12868	0.0604441	0	0.0238314	0.0355229	0.0419727	0	0.0464709	0	0.0500728	0	0.194279	0.0724805	0.0564641	0	0	0	0.0375926	0	0	0	0.41546	0.91233
GSM275229	0.359414	0	0.152728	0.0367553	0.0017181	0	0.132177	0	0	0.0266331	0.0128533	0	0	0.0461313	0.0482288	0.161383	0	0	0.0129554	0	0.00159135	0.00743156	0	0.510739	0.860881
GSM275232	0.0128634	0.19515	0	0.106747	0	0	0.0969564	0.0714014	0	0.113632	0	0	0	0.253278	0.0918068	0.0267074	0	0	0.0313393	0	0	0.000118434	0	0.543223	0.845015
GSM275237	0.0473974	0.253057	0.0436282	0.0971545	0	0	0.154435	0.00483833	0	0.0924443	0	0	0	0.0868625	0.0597362	0.104497	0	0.0183997	0.0364393	0	7.62e-05	0.00103402	0	0.519971	0.857079
GSM275238	0.0645183	0.267496	0	0.111525	0	0	0.158994	0.0266357	0	0.0290085	0.00811594	0	0	0.0182743	0.0651017	0.0802227	0.0355148	0.0256292	0.0581839	0	0.0437238	0.00705575	0	0.412497	0.910244
GSM275239	0.198906	0.107958	0.0675559	0.0418969	0	0.008888	0.0350008	0.102369	0	0.125735	0	0.0165265	0	0.152447	0.0630336	0.0688473	0	0	0.005737	0	0.00509861	0	0	0.475217	0.879106
GSM275240	0.111641	0	0.0218584	0.107704	0	0	0.0742656	0.0788959	0	0.186498	0	0.00521918	0	0.240577	0.0769706	0.094656	0	0	0	0.00171446	0	0	0	0.434494	0.900019
GSM275241	0.11656	0.273557	0	0.0134069	0	0	0.219957	0.0359297	0	0.0609314	0	0	0	0.126402	0.0453161	0.0347948	0	0	0.0656901	0	0.000475215	0.00698019	0	0.517145	0.857489
GSM275242	0.299311	0	0	0.0929068	0	0	0.104057	0.0827403	0.00101552	0.0950889	0	0	0	0.170365	0.0681361	0.0354127	0.00687701	0	0.016146	0	0.0279426	0	0	0.555547	0.836179
GSM275247	0	0.0675925	0	0.100721	0	0	0.138436	0.0177325	0	0.136252	0	0.00945274	0	0.271296	0.0816408	0.12194	0	0	0.0465102	0	0.00842674	0	0	0.526811	0.853831
GSM275249	0	0.16834	0	0.0881804	0	0	0.137637	0.0479284	0	0.132694	0	0.0230893	0	0.153207	0.123975	0.0515444	0.00560182	0	0.0595752	0	0.00189214	0.00633494	0	0.514962	0.860631
GSM275252	0.0873473	0.354672	0	0.027667	0.021664	0	0.0359309	0.0426816	0	0.0719409	0	0	0	0.287908	0.0429016	0.0158275	0	0	0.00911938	0	0	0.00234012	0	0.499028	0.866282
GSM275256	0.14292	0.00552354	0.00013984	0.075973	0	0	0.210689	0.051317	0	0.207553	0	0.00716764	0	0.0171812	0.141857	0.0538354	0.00406564	0	0.0791661	0	0.00261144	0	0	0.493193	0.869562
GSM275271	0	0.576948	0	0.085363	0.00834837	0	0.122213	0.00562345	0	0.0745795	0	0	0	0	0.0578586	0.053212	0	0.0142482	0.00160632	0	0	0	0	0.653848	0.758174
GSM275272	0.0384648	0.371498	0	0.0930515	0.00885053	0.0499413	0.0874359	0.000390731	0	0.0278489	0	0	0	0.129699	0.0568639	0.0755265	0	0.0368481	0.00970304	0	0.0138783	0	0	0.425118	0.906039
GSM275273	0	0.34461	0.0171457	0.0609495	0.0350479	0	0.0726179	0.129966	0	0.0788481	0	0.00724584	0	0.0158171	0.0768902	0.146017	0.00165227	0.00346587	0	0.0095416	0.000184689	0	0	0.233547	1.00059
GSM275279	0.0168217	0.436032	0	0.157069	0	0.03673	0.0554326	0.0649445	0	0.00125403	0	0.0495641	0.00546576	0.0159436	0.0364313	0.0333592	0.0127805	0.0408465	0.0329894	0	0	0.00433581	0	0.508419	0.860489
GSM275282	0	0.119218	0	0.0903429	0	0	0.112363	0.144455	0	0.231489	0	0	0	0.123858	0.0877407	0.0866842	0	0	0.00229561	0.00155276	0	0	0	0.445275	0.894668
GSM275283	0.286545	0.25297	0.0511533	0.0336745	0.0159594	0	0.000601529	0.0135387	0	0.0175055	0	0.00931848	0	0.15292	0.0899642	0.0472061	0	0	0.0286427	0	0	0	0	0.589109	0.807729
GSM275284	0	0.294572	0	0.050818	0	0	0.00220183	0.0250644	0.00441977	0.0320451	0	0.0499789	0	0.232	0.221165	0.0672795	0	0	0.0204561	0	0	0	0	0.493537	0.870127
GSM275286	0.179605	0.120649	0.0347419	0.126867	0	0	0.0492215	0.0862463	0	0.0700473	0	0	0	0.134101	0.0936803	0.0793664	0	0	0	0.00587848	0.0195968	0	0	0.549066	0.838602
GSM275290	0	0.200416	0.0197274	0.116106	0	0	0.101156	0.0554043	0	0.104952	0	0.0102588	0.000317516	0.234605	0.0522001	0.0966434	0.000209114	0	0.00800365	0	0	0	0	0.578645	0.827234
GSM275291	0.0595239	0.410393	0	0.00887036	0	0	0.038624	0.0411771	0	0.0452753	0	0.0273459	0	0.154566	0.0951288	0.105291	0	0	0.00276424	0	0.0100993	0.000941494	0	0.560325	0.828109
GSM275300	0	0.120751	0.098562	0.0514835	0	0	0.179694	0.0542544	0	0.130816	0.0537595	0	0	0.184539	0.0431477	0.0556595	0	0.00902892	0.016494	0	0	0.00181044	0	0.567263	0.8342
GSM275307	0.0594297	0.442046	0	0.0531773	0	0.0128886	0	0.0678641	0	0	0	0.0307917	0	0.167421	0.0885868	0.0488506	0	0	0.0239695	0	0.00497499	0	0	0.632034	0.778777
GSM2328918	0.476814	0	0	0.0293926	0	0.0595221	0.0068092	0.123062	0.0123044	0.0142312	0	0.0359664	0	0.149323	0.0189749	0.0566113	0	0	0.0169882	0	0	0	0	0.602202	0.798155
GSM2328919	0	0.0261962	0.0232607	0.156459	0	0	0.165422	0.047136	0	0.0285927	0.00832177	0	0.0442035	0	0.0671926	0.202998	0	0.184891	0.0331139	0	0	0.0122119	0	0.444226	0.895534
GSM2328920	0.182188	0.179575	0	0.0653002	0.0921615	0	0.044435	0.0918653	0	0.122468	0	0	0	0.0898943	0.0525684	0.0706086	0	0	0.00893522	0	0	0	0	0.60159	0.805759
GSM2328923	0.0321161	0.231859	0	0.0383191	0	0.0367835	0.0238594	0.0479072	0	0	0	0.00935992	0	0.363293	0.0542277	0.120882	0	0	0.0336451	0	0	0.00774847	0	0.533083	0.846598
GSM2328924	0.02807	0.136569	0.0135435	0.0994399	0	0	0	0.078107	0.00834638	0.128533	0	0.0662332	0	0.315938	0.0624221	0.0412288	0	0	0.0150848	0	0.00204374	0.00444029	0	0.597392	0.810088
GSM2328928	0.213662	0.245558	0	0.0169819	0	0.0134121	0.0642364	0.169066	0	0.0396748	0	0	0	0.115215	0.0713118	0.0303769	0	0	0	0.0166913	0.00361986	0.000194086	0	0.445232	0.898644
GSM2328929	0	0.693727	0	0.0235112	0	0.0480474	0.041192	0.0381141	0	0	0.00276513	0	0.0160166	0	0.051336	0.0750296	0	0	0.0076933	0	0.00256781	0	0	0.517779	0.868611
GSM2328930	0.0973067	0.32979	0.0630385	0.0701877	0.0339495	0	0.151242	0.0290172	0	0.0136765	0.00986019	0	0	0.0606044	0.0442376	0.0662733	0	0	0.0308165	0	0	0	0	0.508856	0.860252
GSM2328934	0.00581739	0.195553	0	0.030893	0	0.108312	0.0274553	0.0517925	0	0.101965	0	0.074745	0	0.179047	0.116633	0.0482647	0	0	0.0552233	0	0.00429925	0	0.4	0.0614228	1.0694
GSM2328936	0	0.34249	0.0234531	0.0379653	0	0	0.0568629	0.0166448	0.0150671	0.0396729	0	0.0294197	0	0.372133	0.0470054	0	0	0	0.0192863	0	0	0	0	0.620637	0.791056
GSM2328938	0.0357145	0.306592	0	0.017715	0	0	0.0341965	0.0663565	0	0.0635937	0	0.0672811	0	0.180696	0.115114	0.0448844	0.000531183	0	0.0596781	0	0.00228419	0.00536282	0	0.534184	0.846828
GSM2328939	0	0.396649	0.0600916	0.0641301	0	0.053076	0.0164684	0.0128706	0	0	0	0.0145531	0	0.114491	0.0618618	0.198847	0	0	0	0	0	0.00696145	0	0.444801	0.897561
GSM2328941	0.250386	0.217379	0.0748222	0	0.0236656	0	0.0245129	0.234643	0	0.037895	0	0.00121556	0	0.0895651	0.0088212	0.0255332	0	0	0.0115608	0	0	0	0	0.598965	0.799994
GSM2328944	0.151965	0.296543	0	0.0801007	0	0.00365458	0.0460014	0.0697084	0	0	0.0507928	0	0	0.218727	0.0170178	0.0249784	0	0.0315974	0	0	0.00891384	0	0	0.519703	0.853567
GSM2328945	0.016055	0	0	0.130937	0.00632954	0	0.168065	0.16257	0	0.0809338	0	0	0	0.219396	0.10902	0.0371301	0	0	0.0590525	0	0.00438993	0.00612045	0	0.596708	0.815566
GSM2328946	0.220507	0.179408	0.0263341	0.0888007	0	0	0.0282386	0.0918448	0	0.0826043	0	0.00804425	0	0.0635941	0.0818878	0.123023	0	0	0.00571314	0	0	0	0	0.412726	0.915536
GSM2328949	0	0.0271262	0.0332225	0.0119383	0	0.0308858	0.0651735	0.112665	0.000333533	0.100449	0	0.0995859	0.0048223	0.0421964	0.11521	0.171389	0	0.124538	0.0290188	0	0	0.0314449	0	0.384948	0.924949
GSM2328950	0.279202	0.19837	0.100781	0	0	0.00545576	0.0358733	0.0878927	0	0.0791484	0	0	0	0.0974321	0.041744	0.0680806	0	0	0	0.000446706	0.00295243	0.00262113	0	0.376378	0.952965
GSM2328951	0.227721	0.0218225	0	0.0676685	0	0	0.0331162	0.0804587	0.00853476	0.101794	0	0.0233999	0	0.0909869	0.117923	0.216114	0	0	0.0104612	0	0	0	0	0.426652	0.904065
GSM2328952	0.0154943	0.535832	0	0.0434397	0	0	0.0148893	0.058808	0	0.0691541	0.0134142	0	0.0291212	0.14132	0.0400945	0.017238	0	0	0	0.00659712	0	0.0145979	0	0.433623	0.910627
GSM2328953	0.0306339	0.0372061	0.0199817	0.353687	0	0	0.122098	0.0684449	0	0.155657	0	0.0562545	0	0.00251621	0.0632008	0.0588983	0.0060069	0	0.0231755	0	0.00223966	0	0	0.481494	0.878643
GSM2328955	0.0939273	0.157102	0	0.072989	0	0.0401841	0.104866	0.0867318	0	0	0.0364324	0	0	0.140288	0.187311	0.0668241	0	0	0	0.000371543	0.00177079	0.0112017	0	0.528266	0.849797
GSM2328956	0	0.141673	0.0303043	0.27877	0	0	0.0671666	0.0713117	0	0.197239	0	0	0	0.0113063	0.0804089	0.0550996	0.0578469	0	0.0027588	0	0.00611409	0	0	0.365333	0.940174
GSM2328959	0.000990535	0.288397	0	0.0437583	0	0	0.105321	0.0690157	0	0.0124796	0.0244208	0.0326038	0	0.213227	0.126549	0.0519547	0	0	0.0229675	0	0	0.00831534	0	0.483794	0.874767
GSM2328966	0.107477	0.169079	0.0866126	0.0169735	0	0	0.0561642	0.0356751	0.00621547	0	0.0229165	0	0	0.260432	0.108975	0.113065	0	0	0.0164144	0	0	0	0	0.489833	0.871079
GSM2328968	0.340374	0.204018	0	0.0465684	0	0	0.0429793	0.0630745	0.00750661	0	0.0237414	0	0	0.0789489	0.0108859	0.0800643	0	0.0814181	0.0165726	0	0.00384774	0	0	0.463167	0.892474
GSM2328969	0.267927	0.252495	0	0.0499434	0	0.0839071	0.0402035	0	0	0.048054	0	0.00479244	0	0.150813	0.0528943	0.0472277	0	0	0.00174241	0	0	0	0	0.547501	0.836199
GSM2328971	0.0854245	0.541056	0	0	0.0125298	0	0.0356074	0.0238691	0	0.0284448	0.0264233	0	0	0.181851	0.0647941	0	0	0	0	0	0	0	0	0.625418	0.779543
GSM2328973	0	0.102337	0.0174478	0	0.070835	0	0.0400192	0.31627	0.0030745	0.278731	0	0	0	0.0972741	0.0473591	0.0239256	0	5.21e-05	0.00267502	0	0	0	0	0.44422	0.898498
GSM2328974	0.254375	0.117286	0	0.0535296	0	0	0.0433999	0.1449	0	0.0880049	0	0.00414223	0	0.219375	0.0544816	0	0	0	0.0205056	0	0	0	0	0.480426	0.876339
GSM2328975	0.0991023	0.287685	0	0.0753299	0.00645143	0	0.101482	0.0334245	0	0.0141829	0	0.0545004	0	0.17851	0.0878787	0.0248584	0	0	0.0341089	0	0.00248656	0	0.26	0.0821387	1.0736
GSM2328977	0.0404397	0.583028	0	0	0	0.0280925	0.0209204	0.0686113	0	0	0.0697572	0	0.000760019	0.108673	0.0175867	0.0519223	0	0	0	0.00559325	0.00461604	0	0	0.498958	0.873833
GSM2328978	0.100234	0.26401	0	0.0333078	0	0	0.0245335	0.136859	0	0.147979	0	0.0682599	0	0.13924	0.0637482	0.017196	0	0	0	5.95e-05	0.0045739	0	0	0.436917	0.90143
GSM2328979	0.214909	0.276121	0.0752896	0	0	0.184253	0.0377578	0.0168614	0	0	0.0588381	0	0.00592283	0.00426883	0.0722496	0.0461148	0	0	0	0.00717418	0.000239697	0	0	0.484453	0.881595
GSM2328980	0.332146	0.217009	0	0	0	0.141776	0.0688722	0.0369704	0	0	0.0645771	0	0.0187303	0.0686462	0.0276209	0.0152064	0	0	0	0.00844674	0	0	0	0.547396	0.837152
GSM2328981	0.0825454	0.190304	0	0.0574351	0	0	0.198945	0.0225305	0	0.211798	0	0.0283113	0	0	0.0674637	0.077832	0.00135935	0	0.0426692	0	0.0188058	0	0	0.458757	0.88773
GSM2328983	0.00523001	0.418758	0	0.0926019	0.020543	0	0.044078	0.0951422	0	0.101328	0	0.0317421	0	0.0903212	0.0650333	0.018854	0	0	0.0163682	0	0	0	0	0.574458	0.819633
GSM2328984	0.0969369	0.142658	0.0311387	0.113511	0	0	0	0.201472	0.00622366	0.118837	0	0.0554814	0	0.153834	0.0431964	0.0271816	0	0	0.00813962	0	0	0.0013901	0	0.600172	0.806662
GSM2328985	0.0390928	0.151998	0	0.0811623	0	0.0029786	0.121734	0.0306788	0.0062593	0.0276988	0	0.00168841	0	0.236588	0.138599	0.0535631	0	0.0688411	0.0327603	0	0.00635728	0	0	0.425418	0.904534
GSM2328986	0	0.144976	0.057725	0.0655369	0	0	0.171669	0.060511	0	0.172813	0	0.00453598	0	0.0594024	0.114924	0.0727356	0.0130825	0	0.0595189	0	0	0.00256998	0	0.549091	0.843794
GSM2328987	0.0599417	0.0932205	0	0.12109	0	0	0.127379	0.0481085	0	0.118188	0	0.021775	0	0.202204	0.124308	0.0527605	0	0	0.0293536	0	0	0.00167049	0	0.545226	0.843463
GSM2328988	0.0671878	0.390627	0	0.0865769	0	0.0332671	0.0130234	0.0500228	0	0	0	0.0147237	0	0.204647	0.0705379	0.0538555	0	0	0	0.0155308	0	0	0	0.365684	0.943746
GSM2328989	0.00206261	0.278155	0.104866	0.0522524	0	0	0.124053	0	0	0.0306468	0.027149	0	0	0.222883	0.0733431	0.0653966	0	0	0.0191931	0	0	0	0	0.690809	0.752192
GSM2328992	0.424232	0.148055	0	0.0553721	0	0.0394489	0	0.103487	0.00710494	0.0624341	0	0.0191711	0	0.0416929	0.0345716	0.0607801	0	0	0.00364953	0	0	0	0	0.588741	0.808709
GSM2328993	0.271889	0.297495	0.0136122	0.0435572	0	0	0.0611146	0.00536478	0	0.0139918	0.0208461	0	0	0.146304	0.0308366	0.0928128	0	0	0.00217564	0	0	0	0	0.685197	0.732675
GSM2328994	0.0121837	0.0366569	0	0.180133	0	0	0.165655	0.0953058	0	0.128949	0	0	0	0.169813	0.0970923	0.088785	0	0	0.0254262	0	0	0	0	0.528655	0.851841
GSM2328995	0.0778441	0.250207	0.00265982	0.0919985	0	0	0.200856	0.0675712	0	0.0616327	0.0153548	0	0	0.0771124	0.0692832	0.0630529	0.00139368	0.00281777	0.0154499	0	0.000480193	0.0022854	0	0.513085	0.859792
GSM2328997	0.0295382	0.0898603	0	0.158643	0	0	0.152755	0.0471186	0	0.120685	0	0	0	0.0810042	0.102315	0.0805334	0	0.0744602	0.0366783	0	0	0.0264083	0	0.456569	0.88929
GSM2328999	0.00208905	0.157008	0	0.133963	0	0	0.152109	0.0111969	0	0.110948	0	0.0155599	0.0140565	0.0751534	0.105286	0.124047	0.000296271	0	0.0617668	0	0.0189288	0.0175912	0	0.278797	0.968008
GSM2329000	0	0.447617	0	0.0454115	0	0	0.00620992	0.125031	0.00950593	0.0173331	0	0.0466016	0	0.185794	0.078868	0.0266538	0	0	0.0109741	0	0	0	0	0.535516	0.843792
GSM2329001	0.0957021	0.213175	0.0368498	0.092248	0	0	0.0516254	0.151054	0	0.107046	0	0	0	0.13397	0.0490988	0.0523183	0	0	0.0169122	0	0	0	0	0.62621	0.793549
GSM2329005	0.018833	0.0939769	0	0.0614633	0.0561247	0	0.142743	0.0851096	0	0.123027	0	0.00769596	0	0.190331	0.100859	0.0842465	0	0	0.0256293	0	0.00278704	0.00717411	0	0.548812	0.844578
GSM2329009	0.00924265	0.207464	0	0.110552	0	0	0.152222	0.0168057	0	0.0639516	0	0	0.00266539	0.0547287	0.167133	0.0751955	0.00150587	0	0.107496	0	0.0310375	0	0	0.323244	0.951889
GSM2329010	0.0626306	0.520651	0	0.00969411	0	0	0.00813307	0.0269597	0.00129066	0.0125157	0.0139	0	0	0.223052	0.0668464	0.0499675	0	0	0.00436007	0	0	0	0	0.579462	0.814627
GSM2329011	0	0.68207	0	0.0314744	0	0	0.00298841	0.0490664	0	0.0259618	0	0.00322518	0	0.151236	0.0453801	0.00859764	0	0	0	0	0	0	0	0.54105	0.849563
GSM2329014	0.0311378	0.0692258	0	0.252967	0.00376716	0	0.192831	0.0433065	0	0.0551838	0.0259609	0	0	0.0512903	0.142683	0.0862416	0	0	0.0419625	0	0	0.00344322	0.01	0.205777	1.01029
GSM2329015	0.0239365	0.552192	0	0	0.0345591	0.0194904	0.0238928	0.00712059	0	0	0	0.0227677	0	0.204217	0.0149487	0.0192731	0	0.0194186	0.027729	0	0.0278618	0.00259297	0	0.48133	0.882259
GSM2329017	0.305132	0.0793707	0.0704458	0.0914838	0	0.000429646	0.00480245	0.210188	0	0.066088	0	0.0406414	0	0.0505277	0.0160009	0.0630768	0	0	0	0	0.00181242	0	0	0.559499	0.82815
GSM2329018	0.0188216	0.246368	0.0331775	0.167306	0	0	0.090097	0.0329843	0	0.129729	0	0.0124606	0	0.0365828	0.0679704	0.0944762	0.00429126	0	0.0109354	0	0.0479589	0.00684063	0	0.387	0.92382
GSM2329019	0.296569	0.00543913	0.0137162	0.0214905	0.0491356	0.0163443	0.0537741	0.0880608	0	0.0502372	0	0.0766403	0	0.0974148	0.126633	0.0261928	0	0	0.0710529	0	0.0037419	0.00355676	0	0.596294	0.809861
GSM2329021	0.033037	0.171654	0	0.0750758	0	0.0458579	0.0157117	0.0160907	0	0.00721741	0	0.0308484	0	0.213859	0.148182	0.0428381	0	0.160639	0.0389888	0	0	0	0	0.422821	0.908486
GSM2329022	0.136291	0	0.353655	0.0421564	0.105932	0.00191624	0.17462	0.0271271	0	0	0	0.0369188	0	0.00705887	0.0236187	0.0491654	0	0	0.0415414	0	0	0	0	0.523559	0.860269
GSM2329023	0.163178	0.099615	0	0.0884852	0	0	0.0931317	0.0761709	0	0.119857	0	0.032758	0	0.0608986	0.130152	0.118296	0	0	0.0149481	0	0.00162203	0.000887163	0	0.564023	0.830929
GSM2329025	0.114778	0.173949	0.313718	0.0558705	0.016932	0	0.0720161	0	0	0.0175063	0.0136257	0	0.00297283	0	0.0275595	0.17276	0	0.0021875	0.0146786	0	0	0.00144575	0.01	0.20601	1.08534
GSM2329026	0	0.720408	0	0.0084368	0	0.0627676	0.0106104	0.0653383	0	0	0	0	0	0.0947143	0.0187912	0.0179714	0	0	0	0	0.000962059	0	0	0.517807	0.873395
GSM2329027	0	0.261833	0.000194691	0.0841227	0	0	0.131406	0.0559042	0	0.116438	0	0	0	0.0856565	0.111962	0.14051	0	0	0.0105798	0	0	0.00139363	0	0.409076	0.912038
GSM2329028	0.162947	0.0692414	0.0412366	0.16988	0	0.00289378	0.0767911	0.0761371	0	0.236152	0	0	0	0.000318967	0.101977	0.032845	0	0	0	0.00462315	0.024958	0	0	0.378252	0.936744
GSM2329029	0	0.272163	0	0.0177275	0	0.00481359	0.00531734	0.0725474	0.00850091	0.0654166	0	0.0464917	0	0.34843	0.0906295	0.0244371	0	0	0.043526	0	0	0	0	0.264263	0.988016
GSM2329030	0.280473	0.291132	0	0.0377132	0	0.00816645	0	0.0601269	0	0.0207171	0	0.0352292	0	0.122401	0.0427755	0.0599771	0	0	0	0.0402446	0.00104451	0	0	0.468354	0.892363
GSM2329031	0.287248	0.00545357	0.0515048	0.0675143	0.0109657	0	0.121217	0.060053	0	0.0299255	0	0.0603093	0	0.188472	0.0714608	0.0235132	0	0	0.0223628	0	0	0	0	0.578797	0.820553
GSM2329032	0.0986927	0.0102309	0.00862386	0.107117	0	0	0.137128	0.0750132	0	0.204365	0	0.0386169	0	0.0539495	0.112197	0.0781074	0.00611278	0	0.0654521	0	0.00439436	0	0	0.420582	0.907294
GSM2329033	0.02059	0.240241	0.0260071	0.0604376	0	0	0.0589635	0.0923323	0	0.0684326	0	0.00161525	0	0.327166	0.0574124	0.0285388	0	0	0.0182636	0	0	0	0	0.494238	0.869017
GSM2329034	0	0.214012	0	0.113615	0	0	0.1652	0.0401179	0	0.168758	0	0	0	0.0667714	0.146199	0.0468191	0.00844032	0	0.0300678	0	0	0	0	0.564488	0.830896
GSM2329035	0.0932253	0.178289	0.238224	0	0	0.0275199	0.0495894	0.0655608	0	0.0590762	0	0.0232056	0	0.104959	0.127864	0.0274715	0	0	0	0.00419955	0.000815318	0	0	0.485382	0.881874
GSM2329036	0	0.245932	0.184703	0.0265279	0	0	0.197816	0.0048481	0	0.0231831	0.0167612	0.00167125	0.0451444	0.0373218	0.085229	0.0655564	0	0	0.0453521	0	0	0.0199533	0	0.312732	0.968346
GSM2329037	0.250506	0.126666	0.0717644	0.0916855	0	0	0.0310956	0.0639363	0.00152696	0.0388726	0	0.00717775	0	0.147546	0.0840785	0.0664165	0	0	0.017006	0	0	0.00172223	0	0.505479	0.86224
GSM2329038	0.0241428	0.262361	0.0788756	0.206392	0	0	0.0803635	0.0399205	0	0.0473904	0	0.0140893	0	0.0209039	0.0846322	0.0749436	0	0.0278654	0.0288257	0	0	0.00929487	0	0.503095	0.863549
GSM2329039	0.212561	0.125263	0	0.0191174	0	0.0345382	0.070418	0.00448092	0	0.0223701	0.0302978	0	0	0.296465	0.0771848	0.0861207	0	0	0.0209332	0	0.00024964	0	0	0.431176	0.903361
GSM2329040	0.00597219	0.290127	0	0.0432235	0.0769072	0	0.115127	0.0415658	0	0.100889	0	0.043394	0	0.109385	0.0897458	0.0544344	0.0110146	0	0	0	0.0182149	0	0	0.473377	0.880259
GSM2329041	0.00133089	0.241602	0	0.0400854	0	0	0.0438463	0.162763	0.0353821	0.00678668	0	0.0252297	0	0.318508	0.0370193	0.0181284	0	0.0535769	0.0153807	0	0.000361152	0	0	0.381649	0.927086
GSM2329043	0	0.0483163	0.00169141	0.301736	0	0	0.218288	0.046341	0	0.208244	0.0302126	0	0	0.012234	0.0441091	0.0755915	0	0	0.013236	0	0	0	0	0.540131	0.840773
GSM2329045	0.213498	0	0	0.0893257	0	0	0.04575	0.080863	0	0.167523	0	0.0350698	0	0.216392	0.0852238	0.0568194	0	0	0	0.00953593	0	0	0	0.443701	0.895749
GSM2329046	0.155444	0	0.06486	0.223498	0	0	0.231687	0.0522946	0	0.047549	0.0393321	0	0	0.0244608	0.0505679	0.0369734	0	0.0606289	0.0127047	0	0	0	0	0.458706	0.887736
GSM2329047	0.0524026	0.111467	0	0.041811	0	0	0.0405738	0.105021	0	0.215365	0	0.0354924	0	0.174549	0.124754	0.074487	0	0	0.0240774	0	0	0	0	0.542879	0.842725
GSM2329050	0.268197	0	0.013339	0.0339024	0.0051324	0	0.091683	0.0381977	0	0.0644627	0	0.056431	0	0.240518	0.0720841	0.0846339	0	0	0.0297259	0	0	0.00169297	0	0.45842	0.887876
GSM2329052	0	0.201743	0	0.126565	0	0	0.0161087	0.117085	0	0.0822546	0	0.0487064	0	0.0307173	0.229234	0.0985913	0.024009	0	0	0.00607053	0.0189158	0	0	0.312206	0.972462
GSM2329054	0.0708141	0.38888	0	0.0399442	0	0.0392629	0.0207621	0.11061	0.0121626	0	0	0	0	0.244586	0.0497745	0.00946856	0.00712631	0	0.00660916	0	0	0	0	0.417069	0.915542
GSM2329055	0	0.636895	0.0320198	0.0250208	0.0204459	0.00171387	0.0873603	0.00010462	0	0	0	0.0288081	0	0.10942	0.0360456	0.00672446	0	0	0.0154416	0	0	0	0	0.681843	0.731729
GSM2329056	0.0039128	0.0545107	0.0235065	0.105828	0	0	0.200655	0.0622722	0	0.151634	0	0	0	0.200791	0.0841362	0.101346	0	0	0.0114072	0	0	0	0	0.493861	0.871127
GSM2329058	0.234125	0.0600633	0	0.14123	0	0	0.0645649	0.113422	0	0.136094	0	0.0247829	0	0.117417	0.0448187	0.0476802	0	0	0.0156455	0	0	0.000156095	0	0.527015	0.85007
GSM2329062	0.1032	0.323095	0	0.0360128	0	0.0463163	0.0436811	0.202265	0	0	0	0.0154251	0.0156043	0.0857298	0.0768853	0.0395964	0	0	0	0	0.0121886	0	0	0.592616	0.808025
GSM2329066	0.0323872	0.0718846	0	0.192481	0	0	0.0518335	0.0897049	0	0.19022	0	0	0	0.215451	0.0850091	0.0634597	0	0	0.0075688	0	0	0	0	0.56563	0.828813
GSM2329067	0.0099363	0.0859227	0.0860694	0	0	0.0303421	0.0874506	0.0565115	0	0.0611239	0	0.0840029	0	0.0603345	0.1069	0.124619	0.0241546	0	0.0712986	0	0.0921691	0.0191653	0	0.230881	0.987671
GSM2329068	0.135089	0.0950845	0.0631239	0.103167	0	0	0.0394138	0.023833	0	0	0	0.0389505	0	0.239393	0.117315	0.105925	0	0	0.0364198	0	0	0.00228546	0	0.470821	0.881362
GSM2329070	0.289107	0.281794	0	0.00973403	0	0	0.00699727	0.0353771	0	0.0243888	0	0.0179158	0	0.22285	0.0404302	0.05671	0	0	0.0146956	0	0	0	0	0.549096	0.836878
GSM2329071	0.256449	0.10581	0.0352866	0.143966	0	0	0.161521	0.0180126	0	0.0606937	0	0	0	0.0329631	0.124413	0.0409083	0	0	0.0180639	0	0	0.00191272	0	0.495899	0.867836
GSM2329072	0.00806611	0.325711	0	0.102744	0	0.0252425	0.0990957	0.0772009	0	0.0976557	0	0	0	0.0549897	0.0802207	0.0740387	0.0115605	0	0.0368643	0	0.00660998	0	0	0.556498	0.836035
GSM2329073	0.0684553	0.366122	0.00739517	0.0544872	0	0	0.112414	0.0356146	0	0.0334236	0.0137242	0	0	0.127671	0.126336	0.0114509	0.00071193	0	0.0421947	0	0	0	0	0.534839	0.84447
GSM2329078	0.166963	0	0.00529349	0.150292	0	0	0.11305	0.0282075	0	0.165752	0	0.0126957	0	0.0966024	0.124199	0.123208	0	0	0.0137372	0	0	0	0	0.460709	0.886743
GSM2329079	0.2397	0.245208	0	0.00563391	0	0.0503728	0.0199961	0.0639901	0	0	0.0257772	0.00307271	0	0.258898	0.0393244	0.0346867	0	0	0.013207	0	0	0.000132498	0	0.457647	0.893278
GSM2329081	0.157175	0.384652	0	0.0485641	0	0	0.0583378	0.0477308	0	0	0.00844647	0.0164281	0	0.0583507	0.0780895	0.108396	0	0.0135815	0.0169526	0	0	0.00329525	0	0.456309	0.895528
GSM2329082	0.053737	0.0312026	0.00171518	0.13941	0	0	0.0654479	0.104396	0	0.217575	0	0.00435776	0	0.226611	0.0991536	0.043942	0.00996572	0	0	0	0	0.00248697	0	0.499513	0.865703
GSM2329083	0	0.0945839	0.00906654	0.194642	0	0	0.0863916	0.0415555	0	0.134355	0	0.046005	0	0.130029	0.138061	0.0897579	0	0	0.0268135	0	0	0.00873952	0	0.507374	0.861657
GSM2329085	0.166707	0.0118536	0.1408	0.119517	0	0	0.0728581	0.0524994	0	0.00752372	0	0.0123265	0	0.285618	0.0387153	0.0846008	0	0	0.00698055	0	0	0	0	0.313868	0.965157
GSM2329086	0.205692	0.070354	0	0.183002	0	0	0.0818959	0.0527199	0	0.103417	0	0.00102335	0	0.146814	0.0726762	0.0571781	0	0	0.0252282	0	0	0	0	0.541874	0.843502
GSM2329087	0.00804447	0.117885	0	0.102356	0	0	0.0957153	0.0520336	0	0.0644398	0	0	0	0.298981	0.192845	0.0399307	0	0	0.027769	0	0	0	0	0.552162	0.83495
GSM2329088	0.0968668	0.117389	0	0.214685	0	0	0.154658	0.0302907	0	0.119551	0.0150166	0	0	0.143895	0.0169325	0.0783871	0	0	0.0101924	0	0	0.00213669	0	0.531723	0.849899
GSM2329090	0	0.102184	0	0.253278	0	0	0.183884	0.0597999	0	0.0990376	0	0	0.0117218	0.112374	0.0732044	0.0875323	0	0	0.0169835	0	0	0	0	0.485689	0.874257
GSM2329091	0.0690281	0.121433	0	0.1029	0	0	0.126515	0.057162	0	0.117801	0	0.0323696	0	0.140564	0.0946652	0.0697843	0	0	0.0619931	0	0	0.0057848	0	0.35366	0.937103
GSM2329092	0	0.346403	0.0467078	0	0	0	0.187908	0.0311253	0	0.00162107	0.0886144	0	0	0.101536	0.0812357	0.0609155	0	0	0.0370997	0	0.00255311	0.0142809	0	0.549384	0.839643
GSM2329093	0.368358	0	0	0.148136	0	0	0.0369397	0.0636643	0.0226062	0.0666976	0	0.0307185	0	0.15558	0.0687118	0.0325468	0	0	0	0.00604107	0	0	0	0.569567	0.822869
GSM2329094	0.0998563	0.175174	0	0.132068	0	0	0.113267	0.0478511	0	0.242202	0	0	0	0.0690952	0.0612992	0.0452422	0	0	0.0138753	0	0	6.94e-05	0	0.440727	0.898105
GSM2329095	0.496249	0	0	0.0780519	0.00835939	0	0.0926868	0.0225426	0	0.0461041	0.0225224	0	0	0.0558095	0.0735167	0.102747	0	0	0	0	0.00141112	0	0	0.393707	0.936391
GSM2329096	0.0214563	0.36493	0.00651559	0.0575521	0.0601189	0	0.0608495	0.10384	0	0.0617567	0	0.0158587	0	0.121575	0.0242467	0.0621456	0	0.0178009	0.0195449	0	0	0.00180864	0	0.593538	0.811943
GSM2329097	0.0257955	0.242647	0	0.0549987	0	0.010186	0.0386508	0.0925507	0.0768142	0	0.0374546	0	0	0.231457	0.0857097	0.043879	0	0.00295008	0.0111729	0	0.0391661	0.00656756	0.06	0.138283	1.03607
GSM2329099	0.533799	0	0.0109934	0.0954113	0.0122554	0.0403532	0.000814363	0.0760158	0	0.0617397	0	0.0530337	0	0.0429449	0.0341994	0.0331221	0	0	0.00531825	0	0	0	0	0.5738	0.821123
GSM2329100	0.166732	0.0102093	0.0220224	0.142929	0	0.00956909	0.134027	0.0904456	0	0.0719693	0	0.0127562	0	0.0933269	0.113627	0.102468	0	0	0.0299176	0	0	0	0	0.521767	0.856572
GSM2329101	0	0.0861121	0.000444591	0.159935	0	0	0.0784674	0.0560974	0	0.104729	0	0.0874196	0	0.150808	0.12534	0.0165757	0	0.104346	0.0297242	0	0	0	0	0.569191	0.825058
GSM2329105	0.14799	0.198778	0	0	0.0120878	0	0.0956722	0.0573385	0	0.0838066	0	0.0448849	0	0.191319	0.101219	0.0312792	0	0	0.0259745	0	0.00573563	0.00391451	0	0.517718	0.855898
GSM2329106	0	0.195672	0	0.0870385	0	0	0.037854	0.0593439	0	0.00778353	0	0.056857	0	0.451051	0.0421137	0.024003	0	0	0.0382838	0	0	0	0	0.51371	0.857525
GSM2329107	0	0.249594	0.0309351	0.0658206	0	0.0278697	0.0887125	0.0400271	0	0.0208483	0.00906357	0	0	0.289916	0.0894551	0.0612882	0	0	0.0211495	0	0	0.00532012	0	0.405708	0.914736
GSM2329108	0	0.188285	0	0.210629	0	0	0.0485629	0.0496313	0.0592875	0.138244	0	0.0160656	0	0.0999087	0.14448	0.0358674	0	0	0.00830972	0	0	0.000728692	0	0.587837	0.813392
GSM2329109	0.00029334	0.0819945	0	0.137299	0	0	0.0848641	0.0834965	0	0.0973705	0	0.0332974	0	0.247347	0.13523	0.0745928	0.00851032	0	0.0144065	0	0	0.00129706	0	0.595248	0.81312
GSM2329110	0.151683	0	0.0366617	0.140216	0	0	0.1963	0.0610234	0	0.154552	0	0	0	0.0645027	0.0893591	0.0926453	0	0	0.0125968	0	0	0.000459407	0	0.524167	0.854439
GSM2329112	0.198489	0.213064	0.14295	0.0493559	0	0	0.00630051	0.0897743	0.0028486	0.0154153	0	0.00528533	0.0025197	0.116989	0.07136	0.071174	0	0	0.0144743	0	0	0	0	0.67462	0.741851
GSM2329113	0	0.369675	0	0.0337348	0.0205001	0.0061564	0.108709	0.00148235	0	0	0.0240756	0.00230822	0.000951221	0.210117	0.0655947	0.0558683	0	0.0681015	0.0152102	0	0	0.0175164	0	0.414502	0.910864
GSM2329115	0.124239	0.530848	0	0.00206411	0.0388006	0	0.000900291	0.0762649	0	0.0164417	0	0.0149955	0	0.100538	0.0592348	0.0279989	0	0	0.00767465	0	0	0	0	0.56109	0.831696
GSM2329116	0.113265	0.245176	0	0.0209768	0.0191454	0	0.047156	0.0306742	0	0	0	0.00978461	0	0.301747	0.0633444	0.00808219	0	0.130954	0.00778906	0	0	0.00190547	0	0.525874	0.849937
GSM2329120	0.183728	0.1183	0	0.0236099	0	0.02975	0.0921078	0.0999766	0	0.0481882	0	0.070644	0	0.126707	0.0676418	0.055304	0.0162142	0	0.0580545	0	0.00977372	0	0	0.449038	0.892655
GSM2329121	0.00682893	0.0266075	0	0.2655	0	0	0.180774	0.0457629	0	0.187068	0	0	0	0.110287	0.109607	0.0444616	0	0.00419376	0.0077053	0	0	0.0112047	0	0.575847	0.819897
GSM2329122	0.0577218	0.442056	0.0204314	0.0320024	0	0	0.0560744	0.0111726	0	0.0019449	0.0367488	0	0	0.209497	0.0397908	0.0784589	0	0	0	0.00220637	0.0118943	0	0	0.517123	0.855947
GSM2329123	0.113905	0.290106	0	0.0504405	0	0.115027	0.0420344	0.117765	0	0.0912792	0	0.00617057	0	0.0655672	0.0684575	0.0392472	0	0	0	0	0	0	0	0.559833	0.828881
GSM2329124	0.0463766	0.357573	0	0.0374546	0	0.0220738	0.0328221	0.0967341	0	0.169105	0	0.0362777	0	0.0455515	0.0520079	0.0812314	0	0	0.0225138	0	0.000278739	0	0	0.505531	0.861977
GSM2329125	0.229371	0.34416	0	0.0823072	0	0.0277105	0	0.117961	0	0	0	0.0277491	0	0.102344	0.0375596	0.0231881	0	0	0	0	0.00764842	0	0	0.509601	0.865421
GSM2329127	0.229844	0.235233	0	0.040166	0	0	0.174513	0.0263774	0	0.0666303	0.0221	0	0	0.0292317	0.0559691	0.104127	0	0	0	0	0.00368367	0.0121246	0	0.523964	0.850919
GSM2329128	0.0323073	0.224601	0.0016084	0.0167393	0	0	0.0877955	0.0552122	0	0.0723428	0	0.0301055	0	0.206122	0.156638	0.0571746	0	0	0.0463726	0	0.00343294	0.00954739	0	0.593487	0.815122
GSM2329129	0	0.263212	0	0.215838	0	0	0.236676	0.0168481	0	0.0138836	0.015893	0.018376	0.00314643	0.0119314	0.0931663	0.062545	0	0.00308411	0.0392211	0	0.000445855	0.00573319	0	0.449956	0.892243
GSM2329130	0.419998	0.291906	0	0.0403694	0	0.0181117	0.00364094	0.0250892	0	0	0	0.0361649	0	0.0982839	0.0291633	0.0242162	0	0	0.0130566	0	0	0	0	0.635065	0.775744
GSM2329132	0.0600285	0.235665	0.0355604	0.0757549	0	0	0.088251	0.0785702	0	0.0575915	0	0	0	0.266605	0.0652919	0.0105721	0	0	0.0261089	0	0	0	0	0.626175	0.795624
GSM2329134	0.0935145	0.152747	0	0.0418499	0	0	0.071806	0.0855771	0	0.099582	0	0.0529082	0	0.185153	0.129955	0.0399005	0	0	0.0402778	0	0	0.00672865	0	0.602383	0.81091
GSM2329135	0.387152	0.131659	0.0197133	0.0298498	0	0.037756	0.0218793	0.0100015	0	0.00365603	0	0.0317945	0	0.179864	0.0439574	0.0822448	0	0	0.0204732	0	0	0	0	0.485168	0.879536
GSM2329136	0	0.128901	0.0597931	0.219043	0	0	0.06896	0.0587544	0	0.169813	0	0.00639964	0.00129397	0.131591	0.0813333	0.0658581	0	0	0	0.00815981	9.97e-05	0	0	0.393989	0.921379
GSM2329138	0.165204	0.0309077	0	0.0720527	0	0	0.0874758	0.129801	0	0.0813382	0	0.0161353	0	0.304969	0.0843675	0.00774077	0	0	0.0200083	0	0	0	0	0.575939	0.825277
GSM2329139	0.551274	0	0	0.0222923	0.0245228	0	0.0166123	0.0112331	0.0171627	0.0781817	0	0	0	0.141298	0.0291532	0.0895712	0	0	0.00318243	0	0.0155161	0	0	0.421488	0.926994
GSM286852	0.441712	0	0.0148859	0.0319885	0	0.0141287	0	0.241927	0.0342954	0.0255519	0	0.0542657	0	0.046415	0.0170061	0.0416741	0	0	0.0361494	0	0	0	0	0.449219	0.902826
GSM286854	0.0366672	0.0524331	0	0.155692	0	0	0.24012	0.0685236	0	0.172351	0	0	0	0.0388504	0.0989137	0.10488	0.010321	0	0.0212476	0	0	0	0	0.494544	0.869285
GSM286856	0.0748956	0.417918	0.0384615	0.0454943	0	0	0.022698	0.0400582	0.00659023	0.0089324	0	0.0383627	0	0.219177	0.0307258	0.0372813	0	0	0.0194056	0	0	0	0	0.343389	0.963934
GSM286857	0.023846	0.0456856	0	0.204924	0	0	0.135186	0.0899496	0	0.231779	0	0	0	0.0171078	0.0701329	0.176217	0	0	0.000945699	0	0	0.00422653	0	0.44832	0.893909
GSM286859	0.0060731	0.0416682	0	0.191089	0	0	0.100331	0.0379068	0	0.139478	0	0	0	0.281538	0.114145	0.0696003	0.00163788	0	0.0117635	0	0	0.00476915	0	0.617811	0.798033
GSM286862	0.0895342	0.0783859	0.00753736	0.0553796	0	0.0156061	0.00779307	0.121578	0.00412373	0.129196	0	0.116933	0	0.118782	0.114559	0.112016	0	0.0147507	0.0116155	0	0	0.00221052	0	0.322248	0.958806
GSM286863	0.0854137	0.343982	0	0.0105199	0	0.0320739	0.0505206	0.039655	0	0	0	0.0345053	0	0.187094	0.127497	0.0467509	0	0.00666152	0.0263987	0	0.00892772	0	0	0.442944	0.898633
GSM286864	0	0.315855	0.0206061	0.0740307	0.0758761	0.0132462	0.0275861	0.0428083	0	0.173022	0	0	0	0.0901569	0.0673337	0.0922422	0	0	0	0.0072363	0	0	0	0.459102	0.887665
GSM286865	0	0.0389638	0.0119408	0.231326	0	0	0.118205	0.0926113	0	0.163934	0	0.0256745	0	0.0574273	0.0730531	0.131856	0	0	0.0440696	0	0.00120279	0.00973699	0	0.504405	0.863292
GSM286869	0.0586079	0.458026	0	0.0896242	0.0122514	0	0.105608	0.0406885	0	5.86e-05	0.00383035	0.00118186	0	0.0483924	0.0797409	0.0859343	0	0	0.0160553	0	0	0	0	0.510606	0.859767
GSM286870	0.032054	0.22393	0	0.130056	0	0.0256258	0.000117447	0.0912107	0	0.0310793	0	0.0806487	0	0.219081	0.0872673	0.0338045	0	0.0139839	0.0256063	0	0.00142271	0.00411311	0	0.387194	0.924374
GSM286875	0.0551279	0.22706	0	0.073055	0	0	0.0409174	0.0525728	0	0.0572904	0.0190014	0	0	0.190161	0.167814	0.107149	0	0	0.00985108	0	0	0	0	0.436451	0.900004
GSM286877	0.000783295	0.413407	0.049732	0.0779684	0.0150342	0	0.0336704	0.0218843	0.000148611	0.0951201	0	0.0292293	0	0.132655	0.0508932	0.0403571	0	0.0245907	0.0145265	0	0	0	0	0.480511	0.877034
GSM286878	0	0.707565	0	0	0	0.0265912	0	0.0295392	0	0.0184538	0	0.0536248	0	0.0864631	0.0223019	0.0173342	0	0	0.0339137	0	0.00152183	0.00269171	0	0.404416	0.954822
GSM286879	0	0.354856	0	0	0	0.0286533	0.0767975	0.0180357	0	0.024777	0.0535937	0	0	0.282662	0.060373	0.0926549	0	0	0.00330368	0	0.00429371	0	0	0.371324	0.934456
GSM286880	0.139289	0.248634	0	0.10831	0	0.0176551	0.0234257	0.177624	0.0445892	0	0.000466144	0.0161488	0	0.0947557	0.0493446	0.0672268	0	0	0	0.0125315	0	0	0	0.468784	0.883429
GSM286881	0	0.346433	0.0464117	0.1197	0	0	0.072258	0.08653	0	0.0944567	0	0	0	0.0761239	0.0517982	0.0431033	0.0210858	0	0.0156127	0	0.0264867	0	0	0.328347	0.956093
GSM286884	0.0451436	0	0.0379902	0.175218	0	0	0.15296	0.0443071	0	0.206244	0	0.0114734	0	0.0571933	0.075232	0.165398	0.0024049	0	0.014436	0	0	0.0119986	0	0.254619	0.986381
GSM286885	0.101191	0.329168	0.0258562	0.0134052	0	0.13127	0.0330151	0.0155435	0	0	0	0.0656345	0.0031578	0.120393	0.0325396	0.0279703	0	0.0846587	0.016197	0	0	0	0	0.544528	0.8385
GSM286887	0.01763	0.322098	0	0.105891	0	0.0303041	0.0516715	0.121572	0	0.0761581	0	0.0357103	0	0.161538	0.0350619	0.0287452	0	0	0.0136203	0	0	0	0	0.223571	1.00704
GSM286889	0.246165	0.487902	0.0235081	0.0698586	0	0	0.00495929	0.0260407	0	0	0	0.0262349	0.0151254	0	0	0.0548112	0	0	0	0.0347201	0.00746943	0.00320496	0	0.296311	1.05037
GSM286890	0.103751	0.339832	0	0.132641	0	0	0.08483	0.019204	0	0.074471	0	0.0181422	0	0.0908005	0.074795	0.0537295	0	0	0.00780355	0	0	0	0	0.505042	0.862362
GSM286891	0.183339	0.0382028	0.0188002	0.0903005	0	0.022369	0.138878	0.096602	0	0.0458411	0	0.0289971	0	0.155594	0.0810146	0.0833553	0.00118466	0	0.0155216	0	0	0	0	0.292769	0.965615
GSM286892	0.00359227	0.301578	0	0.0843547	0	0	0.0922327	0.0438983	0	0.10331	0.011008	0	0	0.206621	0.0824092	0.0646547	0	0	0.00634031	0	0	0	0	0.439905	0.897338
GSM575644	0	0.36133	0	0.0475834	0	0	0.0332946	0.0275256	0	0	0	0.0426875	0	0.332094	0.0669325	0.0436767	0	0	0.0448766	0	0	0	0	0.546911	0.83778
GSM575649	0	0.0118967	0.0117107	0.196855	0	0	0.208007	0.0516817	0	0.222472	0	0.0387882	0	0.0239008	0.0675981	0.084348	0.013886	0	0.0381346	0	0.00917807	0.0215436	0	0.471138	0.881663
GSM575650	0.0062753	0	0.015124	0.00569754	0	0.0417711	0.0416961	0.138174	0	0.255786	0	0.0507412	0	0.132077	0.0829124	0.190786	0.0155873	0	0.0233718	0	0	0	0	0.568335	0.827947
GSM575652	0	0.322129	0	0.0725069	0	0.0710734	0.0258598	0.018661	0	0.0410636	0	0.10388	0	0.151972	0.0753418	0.0864478	0	0.0107064	0	0.00754851	0.000663927	0.012146	0	0.422224	0.907254
GSM575655	0	0.190475	0.063025	0	0	0.0694234	0.11093	0.0546122	0	0.101695	0	0.00851945	0	0.089921	0.11218	0.112306	0.0234072	0	0.0412156	0	0.00724639	0.0150424	0	0.385025	0.922445
GSM575657	0	0.187684	0.0268637	0.179894	0	0	0.104756	0.02839	0	0.16845	0	0.017717	0	0.0473412	0.0807514	0.131589	0.00289437	0	0	0.00597872	0.00909531	0.00859565	0	0.437247	0.898662
GSM575661	0	0.161492	0	0.0685932	0	0	0.105432	0.023057	0	0.03031	0	0.0564279	0	0.304156	0.156079	0.0527053	0	0	0.0416837	0	0	6.47e-05	0	0.490549	0.870688
GSM575662	0	0.165193	0.0242294	0.206132	0	0	0.065503	0.0718675	0	0.0671256	0	0.101143	0	0.0785465	0.113004	0.0764575	0.0145287	0	0.0118733	0	0.00116543	0.00323094	0	0.36235	0.938807
GSM575665	0.06406	0.141351	0.0414357	0.0563402	0.213119	0.0510993	0.0496018	0.0906507	0	0.0705511	0	0	0	0.0836838	0.0691561	0.0472632	0	0	0	0.0153084	0	0.00637941	0	0.478579	0.877269
GSM575673	0.0553849	0.279515	0.0535287	0.176502	0	0	0	0.134679	0	0.0757121	0	0.0101862	0	0.108799	0.034222	0.0633686	0	0	0	0.00810265	0	0	0	0.57538	0.819673
GSM575676	0.00574967	0.0426069	0.00263846	0.146286	0	0.121192	0.0608346	0.0211185	0	0.149922	0.0878101	0	0.0315014	0.091773	0.0426763	0.0301502	0	0	0.0169451	0	0	0.148796	0	0.645344	0.778753
GSM575678	0	0.326281	0	0.0391594	0.0677039	0	0.0298868	0.0153431	0.00324605	0	0	0.0451926	0	0.318484	0.0892444	0.0363537	0	0	0.0291051	0	0	0	0	0.592785	0.811255
GSM575679	0	0.180026	0.00311425	0.0499847	0	0.0894821	0.127555	0	0	0.115814	0	0	0	0.254526	0.0972951	0.034454	0	0.0120449	0.0275065	0	0.000251542	0.00794586	0	0.449513	0.892678
GSM575681	0	0.152921	0.0115189	0.107047	0	0	0.0709919	0.0893795	0	0.0837097	0	0	0	0.252847	0.126399	0.0574696	0	0	0.0429225	0	0	0.00479421	0	0.590934	0.819534
GSM575682	0	0	0.00652834	0.18107	0	0	0.237708	0.135789	0	0.170837	0	0.0469455	0	0.101033	0.0834852	0.0319586	0	0	0	0	0	0.00464467	0	0.668894	0.757219
GSM575687	0.0315572	0.180564	0.1622	0.0716963	0.0343632	0	0.021039	0.0200765	0	0.062276	0	0.00641355	0	0.240614	0.0637819	0.0992005	0	0	0	0	0	0.00621831	0	0.583324	0.814835
GSM575688	0.106455	0.214984	0	0.103082	0	0	0.0202275	0.0455139	0	0	0	0.0559619	0	0.251668	0.0931803	0.0423125	0	0	0.061621	0	0.00499447	0	0	0.488631	0.871822
GSM575689	0.0118638	0.163935	0	0.118085	0	0.0229708	0.0591535	0.0222842	0	0.101848	0	0.0229288	0.0246881	0.282471	0.137548	0	0	0	0.032224	0	0	0	0	0.624496	0.796151
GSM575693	0.00290816	0.0567486	0	0.110649	0	0	0.0770448	0.063196	0	0.0968377	0	0.0319025	0	0.385949	0.0777237	0.0466343	0	0	0.0452504	0	0.0051558	0	0	0.568869	0.826374
GSM575698	0.0880027	0.127128	0	0.102179	0.00368772	0	0.173962	0.112058	0	0.108829	0.0140502	0	0	0.0958458	0.0805772	0.0714322	0	0	0.0222481	0	0	0	0	0.534786	0.850251
GSM575700	0.00881998	0.0504165	0.00519118	0.0726128	0	0	0.171583	0.0603645	0	0.15742	0	0	0	0.167417	0.18431	0.0575762	0.0039554	0	0.057468	0	0	0.00286525	0	0.413536	0.911014
GSM275006	0.00733871	0.174087	0.099207	0.14299	0	0	0.0387539	0.101205	0	0.117495	0	0.055642	0	0.0395758	0.0825164	0.136351	0	0	0.00382409	0	0	0.00101523	0	0.475303	0.879007
GSM275021	0	0.21571	0.00859792	0.0845992	0	0.0362373	0.0460976	0.0424279	0.00237704	0.0218799	0	0.0235186	0	0.290327	0.0988704	0.0732617	0	0.0225091	0.0246343	0	0	0.00895207	0	0.5665	0.830748
GSM275055	0.0250918	0.35101	0	0.0475829	0	0.171378	0.0035432	0.100257	0	0	0	0.0465844	0	0.139858	0.0509404	0.0412433	0	0	0.016153	0	0.000920083	0.00543767	0	0.469482	0.882417
GSM275064	0	0.206398	0	0.0805975	0	0.0471511	0.0884492	0.128474	0	0.04689	0	0.00189226	0	0.236866	0.078946	0.0734542	0	0	0.0108817	0	0	0	0	0.456276	0.889302
GSM275076	0.0868605	0.00572929	0.0819829	0.193452	0	0.0361794	0.0758128	0.0685708	0	0.143842	0	0	0	0.130239	0.069768	0.0790415	0	0	0	0.000478674	0.0280431	0	0	0.555612	0.836818
GSM275077	0.0683286	0.155278	0.000964931	0.138183	0	0	0.113139	0.0546584	0	0.128556	0	0	0	0.108951	0.115897	0.102607	0.00175643	0	0.0107905	0	0.000890991	0	0	0.422453	0.905786
GSM275078	0.0416636	0.0873096	0.0188733	0.206707	0	0	0.100636	0.145164	0	0.150671	0	0	0	0.0249619	0.0877379	0.133039	0	0	0.00323679	0	0	0	0	0.513242	0.8583
GSM275081	0.126935	0.0144563	0.00997483	0.166218	0	0	0.117566	0.068204	0	0.142267	0	0.0276292	0	0.040791	0.0728932	0.174061	0.00224857	0	0.0317269	0	0.000577256	0.00445112	0	0.394605	0.918991
GSM275093	0	0.379191	0.01756	0.0373619	0	0.0585232	0.0387946	0.043819	0	0.0209918	0	0.0759483	0	0.0766913	0.112985	0.0174226	0	0.00270042	0.0760591	0	0.0291605	0.0127916	0	0.378307	0.931363
GSM275094	0.0989886	0.103779	0.0148969	0.109125	0	0	0.0627857	0.104813	0.0051255	0.0593469	0	0	0	0.179962	0.133818	0.0912526	0	0	0.0361079	0	0	0	0	0.392989	0.919936
GSM275097	0	0.314703	0	0.0400106	0	0.0454622	0.0311004	0.00139904	0	0.0392242	0	0.0647087	0	0.350797	0.0536594	0.0377143	0	0	0.0174489	0	0	0.0037719	0	0.467575	0.883766
GSM275101	0	0.475268	0.0047933	0.0963663	0	0	0.0267914	0.041072	0.0259507	0.0444279	0	0.0218488	0	0.115735	0.0965651	0.0168021	0	0	0.0243709	0	0	0.0100092	0	0.477192	0.879993
GSM275111	0.00203622	0.13433	0	0.226062	0	0	0.125341	0.0216555	0	0.0971006	0	0.0147381	0	0.172901	0.10102	0.0749849	0	0	0.0298322	0	0	0	0	0.474273	0.880049
GSM275112	0.0355667	0.0509421	0	0.166095	0	0	0.126265	0.0696057	0.00027571	0.166083	0	0	0	0.189664	0.131928	0.0335398	0	0	0.0273824	0	0	0.0026527	0	0.579654	0.821945
GSM275122	0	0.202617	0.0477253	0.0707907	0.00747077	0	0.123856	0.00297016	0	0.0631078	0.0306296	0	0	0.249001	0.129865	0.0466614	0	0	0.0217073	0	0	0.00359749	0	0.509868	0.861284
GSM275137	0.106748	0.281947	0.0410837	0.0443304	0	0.0190788	0.00298064	0.0291754	0	0.0190644	0	0.0502477	0.0114712	0.227071	0.0687586	0.0714879	0	0	0.026555	0	0	0	0	0.602333	0.802623
GSM275138	0.0483769	0	0	0.144744	0	0.0227608	0.0345517	0.0388317	0	0.131811	0	0.0373764	0	0.31266	0.0953337	0.087896	0	0	0.0411274	0	0.00453047	0	0	0.585917	0.816532
GSM275140	0	0.0799226	0.0227822	0.109902	0	0	0.20476	0.0755088	0	0.22367	0	0	0	0.0524486	0.0829097	0.105824	0.00155668	0	0.0246007	0	0.00872768	0.00738741	0	0.410303	0.91178
GSM275142	0.0496556	0.247183	0	0.0533603	0	0.124601	0	0.0232508	0	0.0599236	0	0.0879079	0	0.14768	0.114676	0.0232932	0	0	0.0670063	0	0.00111951	0.000342567	0	0.447287	0.893864
GSM275144	0	0.45399	0	0.0535244	0	0.00580547	0.00939459	0.061786	0.0213073	0.00124057	0	0.0151309	0	0.207861	0.0409037	0.110876	0.000223758	0	0.0179559	0	0	0	0	0.457569	0.890616
GSM275148	0.0852319	0.123965	0	0.0798789	0.0436318	0	0.0151479	0.0376332	0	0	0.0219611	0.0335612	0	0.355309	0.0843374	0.0731938	0	0	0.0393736	0	0.00677497	0	0	0.534466	0.846563
GSM275149	0	0.040645	0.00588688	0.236401	0	0	0.199665	0.0449498	0	0.24597	0	0	0	0.0258836	0.0527176	0.137328	0.00400593	0	0.00432467	0	0	0.00222291	0	0.47048	0.882222
GSM275153	0.164873	0.0978969	0	0.0681407	0	0.0480771	0.0388931	0.0413306	0	0.0127297	0.0162225	0	0	0.339458	0.0870352	0.0633879	0	0	0.021955	0	0	0	0	0.455249	0.889949
GSM275154	0.0176224	0.283549	0.0166935	0.0830118	0	0.0443464	0.0588577	0.15093	0	0.0976859	0	0	0	0.0667242	0.0981245	0.0661779	0.00615433	0	0.00534513	0	0.00477668	0	0	0.425721	0.905267
GSM275165	0.0223986	0.0671474	0.048107	0.122683	0	0	0.24411	0.0194373	0	0.100677	0.00322163	0	0.00118631	0.068855	0.121364	0.140729	0	0	0.0169682	0	0	0.0231165	0	0.421866	0.905814
GSM275168	0.044488	0.0922839	0.15151	0.0609893	0	0	0.106112	0.0424938	0	0.143545	0	0.00672955	0	0.128532	0.0974825	0.060761	0.0167993	0	0.0403716	0	0.00790237	0	0	0.621571	0.800124
GSM275171	0	0.202957	0.00709842	0.137401	0	0	0.118951	0.00899196	0	0.157142	0	0.0152933	0	0.1884	0.102866	0.0432685	0	0.00210279	0	0	0.00498786	0.0105415	0	0.437328	0.89861
GSM275172	0.0335572	0.16309	0.021513	0.151741	0	0	0.260458	0.0567825	0	0.115835	0	0	0	0	0.042362	0.100373	0	0.000962191	0.0373099	0	0.0107641	0.00525144	0	0.420916	0.906501
GSM275173	0	0.0166069	0.0101424	0.116428	0	0.0163528	0.286187	0	0	0.315637	0	0	0.0403353	0.0249204	0.0762865	0.0420103	0	0.000883857	0.013345	0	0.0100871	0.0307775	0	0.509904	0.859404
GSM275174	0.238018	0.100044	0.134541	0.0638981	0	0	0.0664527	0.0414725	0.0107883	0	0	0.0142906	0.00146013	0.039669	0.0872051	0.115203	0	0	0.0177661	0	0.0627003	0.00649197	0	0.507156	0.86152
GSM275176	0.0630006	0.0936476	0.0221679	0.175154	0	0	0.0932035	0.0633793	0	0.16621	0	0	0	0.0928127	0.0986192	0.125927	0	0	0.00322296	0	0.00265568	0	0	0.520727	0.855659
GSM275177	0.012734	0.068792	0.0823598	0.118325	0	0	0.206385	0.000612357	0	0.0392115	0.0170047	0	0	0.153636	0.129859	0.102508	0	0	0.0449652	0	0.00293834	0.02067	0	0.423425	0.905151
GSM275180	0.0667176	0.133595	0.0281342	0.111627	0	0.0054069	0.168128	0.126297	0	0.0456743	0	0	0	0.173587	0.0852986	0.0379557	0	0	0.0159358	0	0	0.00164311	0	0.416312	0.908532
GSM275188	0.000244094	0.0641232	0.0154112	0.0409306	0.0206348	0.0363787	0.14248	0.0143893	0	0.182623	0.00790624	0	0	0.345713	0.100765	0.0239138	0	0	0.00448687	0	0	0	0	0.585253	0.817589
GSM275192	0	0.0854031	0.00402734	0.128775	0.00912976	0	0.194528	0.0900595	0	0.189011	0	8.94e-05	0	0.0866336	0.0594537	0.0990565	0	0.00339246	0.04254	0	0.00501034	0.00289077	0	0.510887	0.862212
GSM275206	0.0198857	0.197372	0.00156784	0.0379572	0	0.0648949	0.181277	0.00844725	0	0.049543	0	0.0963037	0.00227849	0.086279	0.099395	0.0930069	0	0.00248532	0.0419166	0	0.00881323	0.00857702	0	0.44132	0.89652
GSM275208	0.0920116	0.000323283	0.00931246	0.06324	0.0473005	0	0.189831	0.0215116	0	0.146773	0	0	0	0.206139	0.0887	0.0977621	0	0	0.0345073	0	0	0.00258909	0	0.480076	0.878693
GSM275209	0.201879	0.044628	0	0.0323862	0	0.104308	0.00551209	0.233656	0.0232233	0.0505859	0	0.0300448	0	0.0717554	0.042141	0.126148	0	0.0157418	0.0179912	0	0	0	0	0.556066	0.834743
GSM275218	0.145861	0.185082	0	0.0870566	0	0	0.019322	0.0755572	0.0258902	0.0807872	0	0.0190419	0	0.159381	0.0427164	0.137293	0	0	0.0220119	0	0	0	0	0.519556	0.855543
GSM275225	0.0271818	0.105747	0	0.0287676	0.176286	0.0939395	0.077269	0	0	0.118952	0	0	0.00231218	0.126476	0.0690339	0.123983	0.00513586	0	0.0309221	0	0.0098805	0.00411523	0	0.365972	0.931345
GSM275258	0.0374681	0.259322	0	0.0363769	0	0.0213924	0.0356068	0.112943	0.0432841	0.0111733	0.0250849	0	0.00690669	0.184062	0.128514	0.074396	0.0021392	0	0.011157	0	0.0101729	0	0	0.585951	0.819099
GSM275259	0.0715048	0.0795434	0.112979	0.0131973	0	0	0.00634413	0.0382083	0.0201251	0.00860868	0.00766684	0	0	0.270334	0.00685766	0.334017	0	0	0	0.025067	0.00554654	0	0	0.46222	0.888168
GSM275288	0.0743421	0.1052	0	0.0959603	0.0573813	0	0.203688	0.0710267	0	0.121436	0.01855	0	0	0.0701272	0.0716936	0.102004	0	0	0.00859017	0	0	0	0	0.5299	0.852976
GSM275289	0	0.126197	0.00456011	0.119512	0	0	0.0754778	0.0369112	0	0.102939	0	0.0440528	0	0.229111	0.103069	0.0837898	0	0	0.064066	0	0.0103133	0	0	0.654512	0.786507
GSM275301	0	0	0.00765563	0.192348	0	0	0.285791	0.0455948	0	0.287096	0	0.0224448	0	0.0437449	0.081148	0.0322068	0	0	0	0	0	0.00197018	0	0.723228	0.709244
GSM275303	0.156535	0.123139	0	0.0785747	0	0.000703149	0.0539779	0.0235933	0	0	0	0.0492388	0	0.168029	0.183028	0.0954218	0	0	0.0630335	0	0.00472558	0	0	0.574411	0.822589
GSM1300747	0	0.104106	0	0.0365057	0.0202318	0	0.0846567	0.0649476	0	0.0888795	0	0.0570278	0	0.202361	0.172161	0.0859088	0	0	0.0742225	0	0	0.00899168	0	0.512679	0.859476
GSM274927	0	0.0867766	0.0197	0.165898	0	0	0.0542902	0.100358	0.00417435	0.109084	0	0.0218796	0	0.268259	0.0692761	0.0955833	0	0	0	0.00472114	0	0	0	0.618865	0.800646
GSM274929	0.168	0.324038	0	0.0248379	0.0323502	0	0.0720361	0.0112887	0	0.0111951	0.0061299	0	0	0.236371	0.0640047	0.0397991	0	0	0.00994913	0	0	0	0	0.529748	0.847577
GSM274963	0.105542	0.110662	0	0.0197892	0.0309381	0.0273845	0.0327074	0.308628	0.00937527	0.039827	0	0.0337172	0	0.082318	0.0406171	0.139953	0	0	0.0185412	0	0	0	0	0.596537	0.812381
GSM274976	0.200085	0.0956561	0.025396	0.0135327	0.0707604	0.115373	0.0402622	0.155053	0	0.073167	0	0.00865269	0	0.0701091	0.0376129	0.0909036	0	0	0	0	0	0.00343703	0	0.62805	0.790095
GSM274982	0	0.308137	0.0114944	0.114984	0	0.00151531	0.0288986	0.0912194	0	0.0718573	0	0.0568362	0	0.175349	0.0648032	0.0710608	0	0	0.00384526	0	0	0	0	0.542805	0.842007
GSM274991	0.0627409	0.163243	0	0.0697719	0	0.106676	0.000305937	0.0756979	0.0406574	0	0	0.0546986	0.0129295	0.209658	0.0833245	0.0898886	0	0	0.0183783	0	0.0120303	0	0	0.527181	0.853034
GSM275012	0.0057337	0.0147762	0.015565	0.1356	0	0	0.0771215	0.115177	0	0.160253	0	0.058487	0	0.157701	0.106804	0.146015	0.00295368	0	0.000825138	0	0.000811531	0.00217554	0	0.589908	0.814446
GSM275024	0.0279283	0.381367	0	0.0438556	0	0.0965471	0.0794488	0.011606	0	0.0105561	0.0280479	0	0	0.220071	0.0763489	0.008762	0	0	0.0154609	0	0	0	0	0.573969	0.822143
GSM275038	0.0438376	0.1018	0.0409833	0.224638	0	0.0112766	0.0874161	0.131738	0	0.092652	0	0.0110668	0	0.12085	0.0391965	0.0811598	0	0	0.00758697	0	0.00579895	0	0	0.61022	0.805679
GSM275043	0.0185067	0	0.0102816	0.324588	0	0.190126	0.0708507	0.0228511	0	0.0831029	0	0	0	0.0550475	0.0716028	0.137074	0	0	0.015807	0	0	0.000161799	0	0.650809	0.770838
GSM275050	0	0.0429211	0.0283895	0.0814844	0	0.087333	0.0770465	0.0506854	0	0.120432	0	0.0441187	0	0.238906	0.122666	0.0908904	0	0	0.00357801	0	0	0.0115486	0	0.523628	0.85316
GSM275068	0.0249738	0.17486	0	0.0160488	0	0.0202741	0.0106899	0.166727	0.00306156	0.0840656	0	0.0682229	0	0.280607	0.0677861	0.0372	0.0141553	0	0.020574	0	0	0.0107544	0	0.61206	0.805507
GSM275079	0.0588293	0.0898027	0	0.162578	0	0	0.143568	0.109635	0	0.149869	0	0	0	0.118244	0.100188	0.0632139	0	0	0.00407295	0	0	0	0	0.488711	0.87215
GSM275082	0.103668	0.277736	0	0.0762044	0	0.0643224	0.0839944	0.0748232	0	0.0773494	0	0	0	0.0749787	0.0723903	0.0724082	0	4.75e-05	0.0220777	0	0	0	0	0.457327	0.888745
GSM275083	0.0230661	0.164844	0.00748287	0.0370265	0.00886696	0.183525	0.0493041	0.0838522	0	0.0569747	0	0	0	0.187473	0.0790524	0.0946271	0	0	0.0195346	0	0	0.00437053	0	0.444029	0.895333
GSM275086	0.0775312	0.164825	0	0.129344	0	0	0.220058	0	0	0.0332373	0.0232889	0	0.0190544	0.0926747	0.0814593	0.107104	0.000252661	0	0.0315563	0	0.0196138	0	0	0.365355	0.931037
GSM275090	0	0.211552	0.00801773	0.0818907	0	0.020637	0.150715	0.0221381	0	0.0973233	0	0	0	0.110981	0.131986	0.10524	0	0.0191744	0.0346454	0	0	0.0056998	0	0.515344	0.860672
GSM275091	0.0821371	0.00265553	0.253625	0	0.0276268	0.0209474	0.0902695	0.052829	0	0.172509	0	0.0306571	0	0.00524934	0.098988	0.0993985	0	0	0.0591965	0	0.00391076	0	0	0.544467	0.838122
GSM275092	0.112287	0.0461387	0.0437436	0.128285	0	0.0169141	0.0650345	0.104289	0	0.123756	0	0	0	0.120598	0.124178	0.113211	0	0	0.00156557	0	0	0	0	0.459565	0.887341
GSM275095	0.0234865	0.0503943	0	0.164171	0	0.00132629	0.123192	0	0	0.131558	0	0.0552918	0	0.213506	0.105227	0.0464909	0	0	0.0835249	0	0	0.00183125	0	0.474338	0.879705
GSM275102	0.00284426	0.120407	0	0.126352	0	0	0.0915597	0.0300565	0	0.0633406	0	0.0640414	0	0.338305	0.103453	0.0298537	0	0	0.0297858	0	0	0	0	0.537985	0.844564
GSM275103	0.0111716	0.135226	0.0151591	0.227553	0	0	0.0551109	0.0637327	0	0.151794	0	0.0318453	0	0.176825	0.103014	0.0237989	0	0	0.00476922	0	0	0	0	0.402307	0.918577
GSM275105	0	0	0.00960965	0.159418	0	0	0.118833	0.0773951	0	0.283597	0	0	0	0.13859	0.155462	0.0485591	4.58e-05	0	0.00766456	0	0.00082543	0	0	0.604923	0.79909
GSM275106	0	0.152463	0.00532549	0.0863773	0	0	0.0953621	0.0398278	0	0.099959	0	0	0	0.262793	0.120868	0.124236	0	0	0.0127887	0	0	0	0	0.475904	0.879065
GSM275107	0	0.225335	0.0267825	0.229505	0	0	0.0310602	0.0952622	0	0.155921	0	0.0439674	0	0.0280349	0.100114	0.0633204	0	0	0	0	0	0.000698234	0	0.327691	0.963366
GSM275109	0.375159	0	0	0.0288376	0	0	0.0471	0.0420836	0	0.197448	0	0	0	0.138468	0.095713	0.0708443	0	0	0.00434548	0	0	0	0	0.48603	0.8738
GSM275110	0	0	0.269813	0.131509	0.00434117	0	0.136992	0.0446496	0	0.221711	0	0	0	0.0227257	0.10356	0.0550029	0.000443058	0	0.00644652	0	0	0.00280636	0	0.457871	0.893478
GSM275113	0	0.109478	0.0613985	0.124719	0	0.0298518	0.0792815	0.039726	0	0.152292	0	0	0	0.254247	0.0561933	0.0827203	0	0	0.0100923	0	0	0	0	0.489214	0.872523
GSM275114	0	0.269198	0.0349757	0.0706377	0.0828042	0.0178291	0.0194548	0	0	0	0.0252533	0	0	0.288879	0.0256316	0.0580507	0	0.0117576	0	0.0874859	0	0.0080427	0	0.420156	0.908289
GSM275115	0.00967339	0.259896	0.00633869	0.0705875	0	0.0114202	0.160194	0	0	0.128486	0	0.0547585	0	0.0762622	0.0836883	0.0668567	0	0	0.0431443	0	0.0286934	0	0	0.447481	0.893436
GSM275118	0.0729982	0.221632	0.0346074	0.0805936	0	0	0.0614572	0.0292401	0	0.0258365	0	0.0556534	0	0.297796	0.0678898	0	0	0	0.0493047	0	0	0.00299139	0	0.54289	0.841732
GSM275121	0.0241982	0.0581084	0.0705708	0.0318092	0	0.0859709	0.0414233	0.0445322	0	0.144396	0	0	0	0.299349	0.0994664	0.0605888	0.00640524	0	0.0242552	0	0	0.00892688	0	0.591873	0.817223
GSM275123	0.0081946	0.127649	0.0782306	0.231831	0	0	0.184118	0.0249544	0	0.0388542	0	0.0233318	0	0.0309155	0.100998	0.110832	0	0.0236668	0.00910599	0	0	0.00731835	0	0.423182	0.905473
GSM275126	0.111571	0.222825	0.00897257	0.121123	0	0.0326584	0.0363041	0.0191038	0	0.0518825	0	0.0420656	0	0.28805	0.036063	0.0138758	0	0	0.0155045	0	0	0	0	0.5418	0.841242
GSM275127	0.117293	0.104205	0	0.0388038	0	0.00927261	0.0170235	0.102017	0.00392111	0.0894641	0	0.0484162	0	0.2021	0.178126	0.0254875	0	0	0.0526136	0	0.0112563	0	0	0.45434	0.890437
GSM275129	0.0199127	0.0782413	0	0.0694763	0	0	0.0266844	0.118091	0	0.0848599	0	0.0282492	0	0.264668	0.153617	0.0730661	0.0184234	0	0.0541206	0	0.00144254	0.00914744	0	0.401364	0.916947
GSM275134	0	0.152346	0	0.191861	0	0	0.0921962	0.193112	0	0.0922333	0	0	0	0.105074	0.0783185	0.0824319	0	0	0.0124268	0	0	0	0	0.343144	0.945719
GSM275136	0.0219877	0.0828224	0	0.18328	0	0	0.219546	0.0301081	0	0.175185	0	0	0	0.0319543	0.125011	0.100795	0	0	0.0293105	0	0	0	0	0.55085	0.838077
GSM275147	0.150427	0.0925853	0.0126495	0.0835809	0	0	0.0741258	0.159324	0	0.16933	0	0	0	0.158108	0.0368927	0.0340852	0	0	0.0193104	0	0.00468386	0.00489777	0	0.430894	0.901981
GSM275156	0.0252716	0.12156	0	0.132246	0	0	0.0939638	0.0830647	0	0.192171	0	0.011978	0	0.114319	0.117832	0.0596375	0.0051554	0	0.0354836	0	0	0.00731662	0	0.421032	0.906872
GSM275157	0	0.386832	0	0.00398652	0	0	0.0374657	0.0235547	0	0.0300369	0	0	0.00438516	0.283764	0.0655028	0.120564	0	0.0243445	0.0195635	0	0	0	0	0.395011	0.92486
GSM275158	0	0.340751	0.0134162	0.0540821	0	0.0438625	0.0349483	0.116137	0	0.0711679	0	0	0	0.132989	0.0928264	0.0669498	0.00804402	0	0	0.0160101	0.00881606	0	0	0.449169	0.892808
GSM275159	0	0.0346056	0.0568523	0	0	0.161369	0.0508575	0.111814	0	0.17404	0	0.0349308	0	0.0429932	0.117248	0.146838	0.014986	0	0.0465435	0	0.0069222	0	0	0.398857	0.917059
GSM275162	0	0.149349	0.0376691	0.00146504	0	0	0.0688131	0.0574285	0	0.120329	0	0	0	0.371983	0.0819255	0.0845913	0	0	0.0166789	0	0.00284788	0.00692057	0	0.593415	0.812761
GSM275163	0.124111	0.171883	0.0899233	0.0297439	0.102006	0.0166292	0.122268	0.0478042	0	0.0842215	0	0	0	0.0877097	0.0355433	0.0421406	0	0.0299037	0.0155913	0	0	0.000520774	0	0.617768	0.797989
GSM275164	0.0949614	0.230818	0.0184628	0.0854484	0	0.0576416	0.0488921	0.0468201	0	0.0234447	0.0145832	0	0	0.203198	0.152348	0.0187202	0	0	0	0	0	0.00466207	0	0.5075	0.860878
GSM275166	0.0850411	0.208587	0	0.137103	0	0	0.103791	0.038896	0	0.204423	0	0	0	0	0.0899167	0.131204	0.000442577	0	0.000595888	0	0	0	0	0.334524	0.953744
GSM275167	0.00482054	0.0477643	0.00927609	0.0877574	0	0	0.232346	0.0235668	0	0.164739	0	0	0	0.223175	0.136151	0.0321468	0.00287094	0	0.0353863	0	0	0	0	0.515624	0.858392
GSM275169	0.0205124	0.0513286	0	0.041878	0.0131275	0.0246736	0.135746	0.0727772	0	0.156826	0	0.0341855	0	0	0.125369	0.211091	0.022035	0	0.0664516	0	0.0239994	0	0	0.48967	0.873527
GSM275170	0.0114699	0.021595	0.00614582	0.0728331	0	0.0430095	0.115775	0	0	0.330228	0.0407343	0	0.0288451	0.0988516	0.0423247	0.0162012	0	0	0.0105627	0	0.0295903	0.131834	0	0.627653	0.786276
GSM275178	0.0395524	0.112239	0.0233371	0.0819981	0	0	0.0922114	0.080499	0	0.207131	0	0.0562895	0	0.110942	0.0603188	0.12688	0.000555408	0	0.00804557	0	0	0	0	0.308667	0.96186
GSM275181	0.001107	0.184123	0.0116015	0.0679578	0	0.0683463	0.100342	0.0236659	0	0.123965	0	0.0308031	0	0.159133	0.128819	0.0790291	0	0	0.0207049	0	0	0.000402303	0	0.420856	0.906546
GSM275182	0.021494	0.238353	0.107641	0.000106327	0.12624	0	0.0569126	0.0244251	0	0.139824	0	0.0276563	0	0.0910461	0.0667602	0.0532427	0.000740592	0	0.0427628	0	0	0.0027947	0	0.677189	0.762836
GSM275183	0.00166289	0.0355385	0.00482472	0.267335	0	0	0.180947	0.0295773	0	0.192509	0	0	0	0.035171	0.0957934	0.111119	0	0.0173042	0.0250935	0	0	0.00312371	0	0.543734	0.840038
GSM275186	0	0.276945	0.0691529	0.130719	0	0	0.099662	0.0196537	0	0.0921745	0	0	0	0.181129	0.0786141	0.0267084	0	0	0.0247855	0	0	0.00045651	0	0.509434	0.860807
GSM275187	0.0328735	0.036931	0.0261561	0.0251359	0	0.206644	0.0979089	0.0381102	0	0.0940317	0	0	0	0.267861	0.0547119	0.0314258	0	0	0	0.0584482	0.00793609	0.0218256	0	0.368099	0.931617
GSM275189	0.0787262	0.146431	0	0.247336	0	0	0.0374045	0.0862911	0	0.201846	0	0.00680803	0	0.0116598	0.0614222	0.111508	0	0.00101495	0.00298406	0	0.00656757	0	0	0.481132	0.87641
GSM275190	0.0312908	0.0735959	0.0787011	0.15404	0	0	0.0211743	0.0555451	0	0.194604	0	0.0411991	0	0.168269	0.0542119	0.118248	0	0	0.0055612	0	0	0.00355983	0	0.577863	0.822625
GSM275193	0.0138344	0.101384	0	0.0950063	0	0.00912249	0.0874764	0.16555	0.0547669	0.025233	0	0	0	0.214305	0.125343	0.0686492	0.0167419	0	0.0193277	0	0.00325927	0	0	0.405764	0.913941
GSM275195	0.0414761	0.244104	0.0604537	0.00654882	0	0.0836555	0.149978	0.0224808	0	0.119458	0	0	0	0.153593	0.0857473	0.032073	0	0	0	0	0	0.000431868	0	0.4543	0.890066
GSM275196	0.052892	0.131765	0.00383304	0.0970447	0	0.00236182	0.26017	0.000606738	0	0.0576148	0	0.0298412	0	0.0738562	0.134155	0.112307	0	0.00584847	0.0286195	0	0.00219291	0.006892	0	0.468017	0.883693
GSM275197	0	0.146886	0.106967	0.126891	0	0.035439	0.0434751	0.0658858	0	0.088048	0	0.0219258	0	0.151463	0.103764	0.109143	0	0	0	0	0	0.000112424	0	0.3314	0.950996
GSM275198	0	0.0366043	0.00894419	0.146761	0	0	0.205468	0.0389263	0	0.169778	0	0	0	0.106719	0.0966978	0.155288	0	0.0143874	0.018433	0	0	0.00199354	0	0.513109	0.860699
GSM275200	0	0.0853148	0.0624213	0.121354	0	0.0210092	0.109328	0.0108883	0	0.210263	0	0	0	0.159003	0.100181	0.0888515	0	0.000834451	0.0259085	0	0	0.00464311	0	0.669146	0.775629
GSM275201	0.0682049	0.264142	0.0495888	0.0874753	0	0.00511668	0.149688	0	0	0.0610129	0	0	0	0.0702315	0.10825	0.0411313	0	0	0.0603728	0	0.0295256	0.00525984	0	0.436518	0.899328
GSM275202	0.01941	0.12594	0.0192126	0.198311	0.0153832	0	0.165356	0.0422282	0	0.256736	0	0	0	0.068986	0.022025	0.0583103	0	0	0.00694765	0	0	0.00115346	0	0.639023	0.781056
GSM275203	0.00215489	0.212454	0.0252481	0.0966379	0.00576839	0	0.150495	0.0279331	0	0.0685265	0	0.0397855	0	0.0512935	0.0933133	0.097049	0	0.0744837	0.0478748	0	0.000677599	0.00630449	0	0.346101	0.940549
GSM275204	0.015968	0.00455664	0.031881	0.152007	0	0.0944247	0.194983	0.0250261	0	0.141561	0	0	0	0	0.107976	0.0965747	0.0358313	0.0120084	0.0514327	0	0.0337892	0.00198005	0	0.442721	0.895811
GSM275205	0	0.128888	0	0.127595	0	0.0373855	0.0728449	0.0299515	0	0.137591	0	0.0405977	0.0154328	0.257129	0.132442	0.00531969	0	0	0.0148233	0	0	0	0	0.537537	0.844598
GSM275210	0	0.0246303	0.0187141	0.183001	0	0	0.231927	0.0486695	0	0.235785	0	0.000229769	0	0.040472	0.0946409	0.0661171	0.00673837	0	0.0449814	0	0.00409321	0	0	0.295818	0.973114
GSM275211	0.262009	0.0366237	0	0.0830785	0.083611	0	0.0298883	0.0790739	0.0302801	0.0721608	0	0.0353425	0	0.114635	0.0842289	0.0512567	0	0	0.0345881	0	0.00322352	0	0	0.494173	0.868767
GSM275214	0.00562781	0.0244482	0.00506924	0.148812	0	0	0.238302	0.0593977	0	0.16066	0	0	0	0.0876318	0.0920735	0.145544	0.00110579	0	0.0285094	0	0	0.00281994	0	0.487404	0.873724
GSM275215	0	0.101919	0.0983192	0.104958	0.181358	0.0164989	0.120421	0	0	0.0330093	0	0	0	0.0914567	0.117304	0.0341286	0.0216519	0.00703327	0.0646583	0	0.00728384	0	0	0.625985	0.803567
GSM275219	0.0452594	0.194933	0	0.0922758	0	0.0111025	0.0629826	0.00810019	0	0.0542021	0	0.0468306	0	0.375617	0.0800316	0.0198578	0	0	0.00880748	0	0	0	0	0.646061	0.778149
GSM275222	0.0159153	0.402886	0.0192111	0.122223	0	0	0.00903272	0.049854	0.0050732	0.025733	0	0.0117597	0	0.233632	0.0541681	0.0310093	0	0	0.0195024	0	0	0	0	0.549461	0.835384
GSM275223	0	0	0.0101097	0.0472512	0.00703403	0	0.250204	0.163812	0	0.22361	0	0	0	0.126705	0.111933	0.0426796	0	0	0.0136596	0	0	0.00300148	0	0.567694	0.827197
GSM275224	0.00732472	0.00647799	0	0.12004	0	0	0.136682	0.0277945	0	0.176518	0	0.0354811	0	0.271823	0.123987	0.0433249	0.00132057	0	0.0399523	0	0	0.00927471	0	0.538418	0.843534
GSM275228	0.0300841	0.216199	0.076102	0.0842989	0	0	0.0719101	0.093581	0.00970607	0.0347019	0.0118242	0	0	0.0483838	0.159699	0.0937056	0	0	0.0163177	0	0.0436756	0.00981134	0	0.280595	0.97811
GSM275230	0.0115581	0.196809	0.0108548	0.0462049	0.0292649	0	0.0425246	0.0340643	0	0.079416	0	0	0	0.310545	0.149093	0.0637558	0	0	0.0259101	0	0	0	0	0.400295	0.919051
GSM275231	0.00953446	0.0511527	0	0.101546	0	0	0.107207	0.0224539	0	0.118751	0	0	0	0.269158	0.178806	0.0991774	0	0	0.0422126	0	0	0	0	0.600477	0.807264
GSM275233	0	0.0798241	0	0.0464687	0.0116405	0	0.092558	0.0177256	0	0.0557541	0	0.0359462	0	0.457143	0.114524	0.0231861	0	0	0.0650021	0	0	0.000226935	0	0.497304	0.867231
GSM275234	0	0.446638	0	0.0448658	0	0	0.0175977	0.0506641	0.00221629	0.0286529	0	0.0163477	0	0.0900618	0.0767794	0.196436	0	0	0.0297406	0	0	0	0	0.37407	0.935578
GSM275235	0	0.283683	0.0166619	0.0615133	0	0.00283905	0.231086	0.0184545	0	0.0625837	0.0357242	0	0.0307557	0	0.0569706	0.104792	0.0140327	0	0.0435378	0	0	0.0373653	0	0.551906	0.844195
GSM275236	0.0662918	0.0548345	0	0.0984727	0	0	0.165497	0.0468626	0	0.189758	0	0	0	0.0653279	0.100414	0.19831	0.00112301	0	0.00801459	0	0	0.00509393	0	0.501039	0.86732
GSM275243	0.112562	0.214119	0	0.0585447	0	0	0.0291258	0.0472308	0	0.0434563	0	0.0470385	0	0.291207	0.094236	0.0481578	0	0	0.014322	0	0	0	0	0.43517	0.90115
GSM275244	0.0289436	0	0	0.146296	0.0615513	0	0.154235	0.0806123	0	0.202742	0	0	0	0.226638	0.062279	0.0237518	0	0	0	0	0.0129516	0	0	0.552034	0.836063
GSM275245	0.0570584	0.0426031	0	0.0653972	0.0298025	0	0.162047	0.0483596	0	0.190818	0	0.0053937	0	0.146303	0.157743	0.0661768	0	0	0.0250381	0	0	0.0032595	0	0.56674	0.829937
GSM275246	0	0.107101	0	0.0343637	0	0.0378641	0.0980423	0.0311347	0	0.0287362	0	0.0425257	0	0.445351	0.0923765	0.0621423	0	0	0.0185136	0	0	0.0018482	0	0.493463	0.869475
GSM275248	0.0260419	0.175219	0	0.0861326	0	0.0306438	0.0427004	0.0626924	0.0217371	0.0912397	0	0.0102528	0	0.290158	0.0539999	0.0782837	0	0	0.030898	0	0	0	0	0.46223	0.886187
GSM275250	0.00162906	0.20579	0	0.0106862	0.00181756	0	0.0403948	0.23914	0.0484928	0.0508613	0	0.000739011	0	0.183085	0.0501957	0.134269	0	0	0.0328997	0	0	0	0	0.408819	0.912282
GSM275251	0.0480386	0.221523	0	0.115079	0.0077876	0	0.0571829	0.0318389	0	0.105335	0	0.00589882	0	0.278438	0.0858301	0.00225625	0	0	0.0407915	0	0	0	0	0.466381	0.883768
GSM275253	0	0.250455	0.00174818	0.0650229	0.0252222	0.0683033	0.0563139	0.158566	0.00195943	0.096345	0	0	0	0.150046	0.0643559	0.0392313	0	0	0.0224307	0	0	0	0	0.443019	0.895734
GSM275254	0	0	0.0122087	0.139446	0	0	0.1722	0.0704782	0	0.180476	0	0.0200951	0	0.162736	0.126662	0.0583462	0.00334809	0	0.0402797	0	0.00334623	0.0103766	0	0.621895	0.796913
GSM275255	0.0176264	0.082753	0	0.0789083	0	0	0.120027	0.131196	0	0.205697	0	0	0	0.256644	0.0616317	0.0257884	0	0	0.0164929	0	0	0.00323571	0	0.5325	0.849125
GSM275257	0	0.1807	0.0255256	0.0671412	0	0.0939881	0.0626136	0.0432355	0	0.164444	0	0	0	0.17132	0.0759236	0.0883942	0	0	0.0213488	0	0	0.00536457	0	0.408591	0.912166
GSM275260	0.0562157	0	0	0.054696	0.00574582	0	0.0326869	0.0692691	0	0.193825	0	0.0446625	0	0.214492	0.127166	0.135648	0	0	0.0655921	0	0	0	0	0.469939	0.881859
GSM275261	0	0.149095	0	0.218649	0	0	0.113241	0.0443048	0	0.163625	0	0.0279699	0	0.0248783	0.0880821	0.114896	0.0384264	0.00114298	0.0108172	0	0	0.00487311	0	0.423039	0.906294
GSM275262	0.0776827	0.0339333	0.371675	0.114601	0	0.0409422	0.0401174	0.0186617	0	0.0891602	0	0	0	0.0626663	0.0359004	0.0750218	0	0.0158029	0.0233872	0	0	0.000447891	0	0.767497	0.650441
GSM275263	0.053007	0.126778	0.0937983	0.0769899	0	0	0.0470797	0.0604698	0	0.082998	0	0.0130023	0	0.216	0.0941706	0.102554	0	0	0.0331523	0	0	0	0	0.544133	0.843532
GSM275264	0	0.0242452	0.0102367	0	0	0.111127	0.0626329	0	0	0.0632813	0	0.0127543	0.0272944	0.180732	0.0499466	0.424294	0	0	0.0330791	0	0	0.000376222	0	0.378462	0.92981
GSM275265	0.0503377	0.0177823	0	0	0	0.0411463	0	0.0485778	0	0.0120377	0.018773	0	0	0.44352	0.0384626	0.259729	0	0	0.0696334	0	0	0	0	0.630387	0.779796
GSM275268	0.0732644	0.0583776	0	0.107507	0	0	0.100921	0.0656988	0	0.198847	0	0	0	0.198733	0.0883639	0.0889819	0.00141244	0	0.0139037	0	0.00398913	0	0	0.381472	0.925674
GSM275274	0.00832933	0.0545923	0.0794333	0.188251	0	0	0.0803528	0.0502349	0	0.159641	0	0.00351342	0	0.12569	0.13273	0.0928312	0	0.00695021	0.0125608	0	0.00101591	0.00387349	0	0.551933	0.837745
GSM275276	0.0397542	0.141845	0.0293928	0.048758	0	0	0.0775113	0.112058	0	0.159513	0	0.0116462	0	0.127249	0.10154	0.11692	0	0	0.0338131	0	0	0	0	0.520223	0.858165
GSM275277	0.0803495	0.0844822	0.0272413	0.0745823	0	0	0.186042	0.0769607	0	0.186218	0	0.000169009	0	0.111478	0.081883	0.0370541	0.0101905	0	0.0354506	0	0.00789901	0	0	0.544177	0.845974
GSM275278	0.0179766	0.0722252	0.093222	0.0101668	0.0309724	0	0.190482	0.143214	0	0.0904778	0	0	0	0.136996	0.134422	0.0402956	0	0.0128297	0.0209438	0	0.00198813	0.00378795	0	0.633687	0.79783
GSM275280	0.0419713	0.116787	0.16898	0.148778	0	0	0.063298	0.0246055	0	0.132005	0	0	0	0.154434	0.0547832	0.0680026	0	0	0.026356	0	0	0	0	0.511189	0.859034
GSM275281	0.233555	0.06728	0.0845839	0.0796004	0.0709114	0.0953915	0.0442725	0.0114546	0	0.0653466	0	0	0	0.0711474	0.0638282	0.0922872	0	0.00312281	0.015523	0	0	0.00169591	0	0.528454	0.848748
GSM275287	0.0428298	0.078094	0.00789341	0.103762	0	0.0328672	0.0129547	0.0844334	0	0.232099	0	0.0222138	0	0.248187	0.0814238	0.0399035	0	0	0.0133387	0	0	0	0	0.527777	0.849859
GSM275294	0.259248	0.144866	0.0246391	0.0489831	0.133514	0.0586961	0.0629142	0.0414977	0.00154976	0.0729279	0	0	0	0.0622273	0.0108425	0.0479441	0	0.0191114	0.0110398	0	0	0	0	0.68893	0.741615
GSM275298	0.0633924	0.332679	0	0.109274	0.00695691	0.0629489	0.0255007	0.00374879	0	0.0458648	0	0.0509594	0	0.173218	0.0812339	0.0283388	0	0	0.0158845	0	0	0	0	0.448289	0.894642
GSM275302	0	0.1591	0.000738445	0.132973	0	0	0.0894081	0.0809541	0	0.0922808	0	0	0	0.246346	0.123559	0.0521462	0	0	0.0224944	0	0	0	0	0.563255	0.833407
GSM275304	0	0.0255814	0	0.109874	0	0	0.163235	0.0582805	0	0.161595	0	0	0	0.25093	0.161379	0.0588641	0	0	0.00883151	0	0	0.00143001	0	0.61329	0.799098
GSM275306	0.0345449	0.262976	0	0.0501614	0	0	0.0673917	0.0853123	0	0.120688	0	0.00720414	0	0.119313	0.0276709	0.199223	0	0.00816923	0	0.00806459	0.00928098	0	0	0.237543	0.991079
GSM275308	0.00619473	0.0756287	0	0.221421	0	0	0.0802992	0.0730598	0	0.185295	0	0	0	0.110934	0.0916367	0.139749	0	0	0.0138811	0	0	0.0019008	0	0.42955	0.902953
GSM2328921	0.0386855	0.274901	0	0.070644	0.063459	0.119181	0.0505641	0.113279	0	0.077316	0	0.0110736	0	0.100077	0.0197939	0.0459789	0	0	0.015047	0	0	0	0	0.534347	0.845965
GSM2328922	0.0422273	0.0570997	0	0.0988164	0	0.0592248	0.0880633	0.0114587	0	0.0640589	0	0.0606334	0	0.369073	0.0718703	0	0	0	0	0.0713709	0	0.00610366	0	0.527636	0.849573
GSM2328925	0.00511725	0	0.00267445	0.232545	0	0	0.220365	0.0382601	0	0.198344	0	0.0227791	0	0.0737757	0.107848	0.0520364	0.000365047	0	0.0300827	0	0	0.0158076	0	0.554392	0.832645
GSM2328926	0	0.354906	0.00882004	0.116285	0	0.0153171	0.024885	0.0651327	0.00248283	0.125769	0	0	0	0.0600566	0.0605678	0.154423	0	0	0	0.00538679	0.0059673	0	0	0.476558	0.87828
GSM2328927	0.013314	0.0226603	0.00116844	0.274569	0.00466116	0	0.257639	0.11449	0	0	0.010644	0	0	0.102264	0.0980452	0.0298204	0.00999928	0	0.0475684	0	0.00482134	0.00833562	0	0.528788	0.851046
GSM2328931	0	0.295493	0.052101	0	0.000648057	0.146464	0.0392225	0.122727	0	0.0689376	0	0.0188182	0	0.0855079	0.0656855	0.0404488	0.013507	0	0.0356406	0	0.00163185	0.0131663	0	0.522683	0.853795
GSM2328932	0.0331181	0.110493	0	0.103377	0	0.0338448	0.0276602	0.0664286	0	0.0909593	0	0.0420489	0	0.254881	0.114454	0.0572098	0.00576354	0	0.0423744	0	0.0100427	0.00734552	0	0.508184	0.862429
GSM2328933	0	0.235586	0	0.0898081	0	0	0.134099	0.0363265	0	0.135504	0	0	0	0.0563781	0.0497785	0.194311	0	0.055087	0.0131216	0	0	0	0	0.416507	0.908311
GSM2328935	0.0738014	0.0620519	0	0.0486078	0.0485828	0.00903736	0.0380537	0.0604665	0	0.0404349	0	0.0108513	0	0.375102	0.173303	0.0219971	0	0	0.0263529	0	0.0113574	0	0	0.601192	0.803555
GSM2328937	0.0618244	0.0762418	0.101494	0.0718098	0.0531316	0	0.117622	0.0772517	0	0.220714	0	0	0	0.112042	0.0318005	0.0325167	0	0	0.0144584	0	0.00210318	0.0269895	0	0.429525	0.90268
GSM2328940	0.18684	0.106147	0	0.077292	0	0.079557	0.0276937	0.231157	0.0034572	0.0717199	0	0.00533851	0	0.12133	0.0316434	0.0483865	0	0	0.00827509	0	0	0.00116366	0	0.556281	0.832475
GSM2328942	0.0261656	0.111877	0	0.0234705	0.066909	0	0.02576	0.106637	0	0.0880803	0	0.018584	0	0.293411	0.0692149	0.134116	0	0	0.0357752	0	0	0	0	0.435257	0.899649
GSM2328943	0.108264	0.136786	0	0.0178373	0	0.200984	0.0556535	0.184236	0	0.0839694	0	0.0050183	0	0.0870892	0.0214277	0.0842275	0	0	0.014507	0	0	0	0	0.455882	0.889412
GSM2328947	0.00112813	0.0325045	0	0.125456	0	0	0.133911	0.109763	0	0.109753	0	0.0229612	0	0.276819	0.08301	0.0917768	0	0.000800549	0.0119281	0	0	0.000189123	0	0.561728	0.8327
GSM2328948	0	0.0907391	0.00775503	0.156522	0	0.025241	0.0284102	0.0369985	0	0.049215	0	0.0862792	0	0.271232	0.131033	0.0211435	0	0.036725	0.0571807	0	0	0.00152562	0	0.429598	0.903427
GSM2328954	0	0.104511	0.206844	0.0912686	0.000529218	0.00219044	0.0396318	0.0642135	0	0.0711105	0	0.0261775	0	0.24927	0.0632787	0.0610259	0	0	0.0120502	0	0	0.00789909	0	0.660465	0.766596
GSM2328957	0	0.224201	0.0524603	0.0340546	0.0810745	0.0577082	0.0884275	0	0	0.114177	0	0.0101992	0	0.0099709	0.0521525	0.0855582	0	0	0.0793497	0	0.110667	0	0	0.617603	0.811493
GSM2328958	0	0.146102	0.0949003	0.10956	0.0707886	0	0.0873345	0.0345521	0	0.166892	0	0	0	0.0489494	0.103686	0.0889941	0.011161	0	0.0302582	0	0.00682233	0	0	0.623614	0.800006
GSM2328960	0.0275402	0.103257	0.0270114	0.216291	0.0231529	0	0.104125	0.124259	0.00833135	0.0959053	0	0.00775943	0	0.120736	0.0712616	0.0489206	0	0	0.0210772	0	0	0.000371013	0	0.55683	0.835542
GSM2328961	0	0.218861	0	0.0830268	0	0	0.0219675	0.0836773	0	0.0806009	0	0.00346454	0	0.267698	0.163378	0.0525732	0	0	0.0247527	0	0	0	0	0.498156	0.866434
GSM2328962	0.148589	0.232363	0.0572632	0.0409919	0.0108341	0.00476974	0.0517065	0	0	0.0030002	0	0.0148077	0	0.296309	0.103199	0.0116007	0	0	0.0245649	0	0	0	0	0.527306	0.848941
GSM2328963	0	0.294738	0.00780314	0.00586662	0	0.0166948	0.0239786	0	0	0	0.000145633	0.0186391	0	0.33013	0.200032	0.0287667	0	0	0.0642198	0	0.00898539	0	0	0.544433	0.837984
GSM2328964	0	0.0217657	0.0384451	0.227853	0	0	0.252817	0.0261206	0	0.121779	0	0.0380841	0.00478571	0.0111782	0.112792	0.110854	0	0	0.0291142	0	0	0.00441242	0	0.222763	1.00691
GSM2328965	0.206419	0.00298185	0	0.110409	0.0694757	0.0511579	0.114384	0.0843731	0	0.119813	0	0	0	0.0790097	0.1128	0.0218647	0	0	0.0223068	0	0	0.00500513	0	0.635753	0.788086
GSM2328967	0.0257534	0.306188	0.0868582	0.0134454	0	0.0430351	0.0949433	0.0167098	0	0.0350986	0.00908905	0	0	0.22654	0.0584925	0.0681096	0	0	0.0152524	0	0	0.000484438	0	0.610333	0.799986
GSM2328970	0	0.0124191	0.000542168	0.16195	0	0	0.0554495	0.046775	0.0122879	0.0890485	0	0.0149301	0	0.42433	0.0895095	0.0504032	0.00231278	0	0.0396431	0	0	0.000399592	0	0.675188	0.754416
GSM2328972	0	0.200157	0	0.130795	0	0	0.0314417	0.0306813	0	0.0723999	0	0.0356053	0	0.398208	0.0578182	0.0221338	0	0	0.0207597	0	0	0	0	0.526806	0.850009
GSM2328976	0	0.0773101	0.00921258	0.0893162	0	0	0.109577	0.0419002	0	0.160141	0	0	0	0.264235	0.140076	0.0802048	0	0	0.0228964	0	0	0.00513155	0	0.581099	0.821513
GSM2328982	0	0.416947	0.0528039	0.00176516	0.000224586	0.118289	0.042157	0.0131089	0	0.0574177	0	0.0683806	0	0.124404	0.0474797	0.0319778	0	0.00154292	0	0.00769123	0	0.0158097	0	0.351624	0.951399
GSM2328990	0	0.0344336	0	0.0298753	0	0	0.0536988	0.0193976	0.00190127	0.012856	0	0.0144584	0	0.595768	0.0180408	0.0362423	0	0.176369	0.00695887	0	0	0	0	0.654342	0.756584
GSM2328991	0.210702	0.100358	0.140946	0.0623092	0	0.0577345	0.00517396	0.0679302	0	0.0681203	0	0.0374116	0.00467164	0.0309714	0.046038	0.132192	0	0	0.0354407	0	0	0	0	0.576731	0.817336
GSM2328996	0.0414543	0.214463	0	0.13063	0	0.0149863	0.0529693	0.108687	0	0.0961914	0	0	0	0.116264	0.0554727	0.158841	0	0	0.00806621	0	0	0.00197404	0	0.478062	0.878329
GSM2328998	0	0.232493	0	0.0436967	0	0	0.061453	0.0406578	0	0.0644526	0	0	0	0.432233	0.0351451	0.0608031	0	0	0	0.0104548	0.00950688	0.00910401	0	0.355539	0.946707
GSM2329002	0.0555764	0.122084	0.0166949	0.0861076	0.0400608	0.0157293	0.0661524	0.0485382	0	0.0846991	0	0.0529628	0	0.210486	0.107554	0.0707159	0	0	0.0187487	0	0	0.00388997	0	0.613682	0.806457
GSM2329003	0.0629808	0.151522	0.140155	0.0838525	0.061114	0	0.090364	0.0203252	0	0.0647791	0.0276225	0	0	0.0871017	0.12909	0.0732199	0	0	0.00708901	0	0	0.000784294	0	0.606558	0.802334
GSM2329004	0.0248617	0.0611801	0.00507092	0.141576	0	0	0.11142	0.0571492	0.00510785	0.0613583	0	0.0265487	0	0.283333	0.188433	0.0187565	0	0	0.0116582	0	0.00354589	0	0	0.666792	0.763378
GSM2329006	0	0.339461	0.0817473	0.0235535	0	0.108178	0.0366796	0.0596474	0	0.0202645	0	0.0167495	0	0.108339	0.0351029	0.0964786	0	0.0404521	0.0161638	0	0.0101803	0.00700246	0	0.494694	0.868378
GSM2329008	0.207283	0.201783	0.130181	0.034119	0.147199	0.0254491	0.0226975	0.042012	0	0.0108384	0	0.00732542	0.00277067	0.0425842	0.0492385	0.0624195	0	0	0.0140997	0	0	0	0	0.733327	0.694114
GSM2329012	0	0.076889	0	0.167064	0	0	0.0466154	0.0599575	0	0.113559	0	0.00160765	0	0.249437	0.142957	0.110661	0.0154473	0	0.0147428	0	0	0.00106309	0	0.329406	0.953889
GSM2329013	0	0.00543593	0.0143444	0.141687	0	0	0.0712489	0.0129097	0	0.0662994	0	0.0752153	0.005968	0.301459	0.174678	0.0933753	0	0	0.0240121	0	0.00633842	0.00702904	0	0.551981	0.833746
GSM2329016	0.342925	0.00700275	0.102295	0.0192795	0	0.0710686	0.0177352	0.00942293	0	0	0.0483506	0	0	0.172133	0.0427418	0.0585165	0	0	0	0.00972765	0.0987335	6.83e-05	0	0.593456	0.806386
GSM2329020	0	0.0915228	0	0.0799468	0	0	0.123497	0.0559126	0	0.116321	0	0.00936794	0	0.230827	0.156393	0.0565966	0	0	0.062737	0	0.00115244	0.0157246	0	0.459741	0.887255
GSM2329024	0	0.0588081	0.00607249	0.186741	0	0	0.159384	0.00561563	0	0.132452	0	0	0.102859	0.0273045	0.211316	0.0601997	0	0.0221877	0.0144798	0	0.00324808	0.00933227	0	0.476309	0.878907
GSM2329042	0	0.11978	0.0198789	0.116182	0	0.0805063	0.0622631	0.00875544	0	0.0973112	0	0.0575141	0	0.0816738	0.131556	0.168814	0.00296446	0	0.0403666	0	0.00532778	0.00710712	0	0.562825	0.834754
GSM2329044	0.100122	0.333715	0	0.0348006	0	0.0522631	0.043324	0.0160129	0	0.0598799	0	0.0509232	0	0.188797	0.0846077	0.00304285	0	0.000464563	0.0269335	0	0.0051136	0	0	0.511324	0.858547
GSM2329048	0.429621	0.0392163	0.120309	0.0403121	0	0	0.0160551	0.0372047	0	0.0243605	0	0.0260526	0	0.168119	0.0833784	0.0139824	0	0	0.00138864	0	0	0	0	0.624105	0.780923
GSM2329049	0.0932595	0.0902997	0.0981425	0.159436	0.114516	0	0.105343	0.0827074	0	0.118892	0	0	0	0.0280635	0.0158383	0.0833664	0	0	0.00641388	0	0.00372202	0	0	0.688252	0.751103
GSM2329051	0	0.138818	0.0543696	0.119332	0	0	0.0803104	0.0761509	0	0.0747409	0	0.00151687	0	0.152649	0.067517	0.188115	0.00313149	0	0	0.0110648	0.0260995	0.00618454	0	0.325014	0.949061
GSM2329053	0.0129524	0.349335	0	0.0132644	0	0.000175796	0.00314027	0.0584439	0.00380332	0.0182469	0	0.0273239	0	0.352865	0.0785552	0.0555594	0	0	0.0263349	0	0	0	0	0.627732	0.785542
GSM2329057	0.286928	0.0158541	0	0.0228161	0.21073	0	0.0839795	0.109574	0	0.0782076	0	0.00361037	0	0.076866	0.0165026	0.0770641	0	0.00569907	0.00830979	0	0	0.00385949	0	0.56092	0.830283
GSM2329059	0	0.0336599	0.0106956	0.0194494	0	0.0586099	0.000637133	0.111427	0	0.237656	0	0.083029	0	0.255315	0.0721346	0.0989146	0	0	0	0.0120612	0.00119551	0.00521607	0	0.507503	0.860829
GSM2329060	0.0141768	0.12773	0.00375424	0.0836735	0	0.0193193	0.0588238	0.0152031	0	0.122184	0	0	0	0.284825	0.131508	0.101567	0	0	0.0334147	0	0.00382073	0	0	0.491802	0.870407
GSM2329061	0	0.117523	0.00542474	0.0372528	0.0131674	0.00130584	0.0718065	0.0253185	0	0.0578939	0	0	0	0.237412	0.0965415	0.186591	0.000196742	0	0.144981	0	0	0.00458536	0	0.40984	0.911695
GSM2329063	0.0455187	0.279672	0	0.0378165	0.0220961	0	0.0505761	0.0227945	0	0.00097508	0	0.029821	0.0014388	0.281581	0.0962889	0.0993748	0	0	0.0299673	0	0	0.0020796	0	0.447743	0.894053
GSM2329064	0	0.178319	0.00190185	0.0288044	0	0.0367406	0.0167077	0.121488	0	0.166354	0	0.0496156	0	0.197442	0.106658	0.0836754	0	0	0.0122922	0	0	0	0	0.480703	0.876333
GSM2329065	0	0.113158	0.0182537	0.0670841	0	0.180928	0.086941	0.095021	0	0.0644964	0	0.0554717	0.0419159	0.0358004	0.0722123	0.099398	0.0127502	0	0.0419971	0	0.00541422	0.00915809	0	0.465264	0.885212
GSM2329069	0	0	0.0028832	0.236973	0	0	0.161728	0.0380265	0	0.178683	0	0.020041	0	0.125748	0.116577	0.0920417	0	0	0.0175138	0	0	0.00978587	0	0.631008	0.786707
GSM2329074	0.00834204	0.129921	0.00877958	0.0482379	0	0.0572087	0.0532587	0.0761576	0	0.102796	0	0	0	0.266554	0.108157	0.113438	0.0104176	0	0.0167326	0	0	0	0	0.362356	0.93478
GSM2329075	0.0640917	0.0718056	0.0189704	0.0509198	0	0.0251207	0.0587351	0.272417	0	0.0287973	0	0	0	0.08743	0.0314426	0.206837	0.00815083	0	0.0202025	0	0.0550794	0	0	0.358879	0.934749
GSM2329076	0.462251	0	0.0187652	0.0132669	0	0.08153	0.0319418	0.13856	0	0.0436053	0	0	0	0.0736302	0.0333195	0.0860818	0	0	0.0170485	0	0	0	0	0.531524	0.847014
GSM2329077	0.0716585	0.285419	0	0.0276532	0	0.0579601	0.0163661	0.0192369	0	0.0211088	0	0.00614063	0	0.243767	0.0835785	0.132504	0.014485	0	0.0201218	0	0	0	0	0.478227	0.877506
GSM2329080	0.0611236	0.30046	0.0338015	0.0405906	0	0.060973	0.100218	0.00306275	0	0.00272758	0.027966	0	0	0.253763	0.0251119	0.0833226	0	0	0.00423048	0	0	0.00264967	0	0.368845	0.936527
GSM2329084	0.0214806	0.0582657	0.00622609	0.107646	0	0	0.14287	0.0651547	0	0.126405	0	0	0	0.29803	0.0750653	0.0879095	0	0	0.0105003	0	0	0.000446571	0	0.46049	0.887063
GSM2329089	0	0.146675	0	0.0105474	0.0224437	0.0386176	0.0512532	0.0139119	0	0.0517972	0	0.0160132	0	0.476252	0.122529	0.0203764	0.00336151	0	0.0262222	0	0	0	0	0.657998	0.762616
GSM2329098	0.127486	0.0988097	0	0.127061	0	0.0347572	0.0628749	0.0516915	0	0.0981782	0	0.0172489	0	0.315241	0.0529911	0.0129459	0	0	0	0	0	0.000714491	0	0.363399	0.937163
GSM2329102	0	0	0.00057228	0.190321	0	0	0.1678	0.0647598	0	0.141159	0	0.0258399	0	0.107807	0.106301	0.137855	0.0149528	0	0.0363232	0	0.00418105	0.00212902	0	0.554276	0.836884
GSM2329103	0.0385713	0.0874998	0.0603181	0.095137	0	0	0.117633	0.0931847	0	0.0634067	0	0.00327779	0	0.222821	0.119604	0.0849725	0.00167211	0	0.0103809	0	0	0.00152086	0	0.41323	0.910079
GSM2329104	0.0132089	0.0980104	0	0.0891466	0	0.0393834	0.129412	0.0220293	0	0.187305	0	0	0	0.186357	0.0753485	0.0986904	0	0.01907	0.0420387	0	0	0	0	0.388121	0.921519
GSM2329111	0.195063	0.0895081	0	0.0463549	0	0.121715	0.010783	0.273812	0	0.0512157	0	0.0352162	0	0.0286251	0.0304992	0.0627134	0.0122804	0.0142863	0.0272607	0	0	0.000667322	0	0.545909	0.83787
GSM2329114	0	0.0613965	0.0256723	0.0904376	0	0	0.128322	0.065852	0	0.134464	0	0	0	0.226106	0.0624718	0.0939105	0	0.0818412	0.0276041	0	0	0.00192269	0	0.51713	0.860358
GSM2329117	0.00435879	0.0524104	0.00968563	0.122473	0	0	0.102494	0.0588487	0	0.0807505	0	0.0107828	0	0.360313	0.0740585	0.0742424	0	0.0209041	0.0259989	0	4.01e-05	0.00263859	0	0.576133	0.823758
GSM2329118	0	0.00591457	0.0221395	0.269827	0	0	0.0455884	0.0620781	0	0.147282	0	0.0434228	0	0.17543	0.0722396	0.0946599	0	0	0.0609159	0	0	0.000501981	0	0.652147	0.776246
GSM2329119	0.0411552	0.0509563	0.0185915	0.246166	0	0	0.158129	0.0356901	0	0.166969	0	0	0	0.0206989	0.150464	0.0705174	0	0	0.0323537	0	0.0026391	0.00566984	0	0.476774	0.878451
GSM2329126	0.0118005	0.175921	0	0.0677046	0	0	0.0219913	0.111587	0	0.0825948	0	0.0265314	0	0.310003	0.14224	0.0373594	0	0	0.0119322	0	0.000336204	0	0	0.502507	0.86399
GSM2329131	0.140673	0.174856	0.0317966	0.0443613	0.164376	0.0688858	0.0122631	0.0620957	0	0.147945	0	0	0	0.0564813	0.0102493	0.0773145	0	0	0.00188969	0	0	0.00681199	0	0.705344	0.735111
GSM2329137	0	0.2006	0.13801	0	0.0209278	0.0561224	0	0.053068	0	0.114244	0	0.0623809	0	0.190073	0.0494702	0.0523448	0	0	0.0537739	0	0.00898445	0	0.14	0.103846	1.0603
GSM2329140	0	0.199558	0	0.0792254	0	0	0.332317	0.00329428	0	0.131579	0.00718323	0	0	0.0117554	0.132529	0.0419028	0	0.0187887	0.0333216	0	0.00854625	0	0.07	0.133089	1.04162
GSM286855	0.0444147	0.239393	0	0.0337004	0	0.0384624	0.0495934	0.052488	0.00705927	0.0448255	0	0	0	0.354431	0.0853327	0.0257657	0	0	0.0245334	0	0	0	0	0.586834	0.815714
GSM286858	0.0259799	0.0390978	0	0.209921	0	0	0.102751	0.0892121	0	0.0886672	0	0.0272868	0	0.159816	0.101816	0.116594	0	0.00336009	0.0280039	0	0	0.00749424	0	0.589426	0.819231
GSM286860	0.0185016	0.264559	0.0362018	0.0244744	0	0.0561238	0.0584905	0.0435702	0	0.070239	0	0	0	0.289088	0.0642738	0.0423338	0	0	0.00508147	0	0.0248848	0.00217797	0	0.650964	0.780452
GSM286861	0.0176896	0.0831118	0	0.0306854	0.000245158	0.0121477	0.0920507	0.0303713	0	0.152377	0	0	0	0.305607	0.149802	0.0731647	0	0	0.0487671	0	0	0.00398091	0	0.590435	0.815105
GSM286867	0.0197407	0.111099	0	0.161716	0	0	0.125464	0.0444857	0	0.0665916	0	0.00611536	0	0.312797	0.101694	0.0188336	0	0	0.0314632	0	0	0	0	0.628645	0.796567
GSM286868	0.051505	0.130359	0	0.0498868	0	0.0247741	0.0627027	0.0129411	0	0.0612035	0	0.00544868	0	0.351946	0.118521	0.106033	0	0	0.0243506	0	0.000327332	0	0	0.658968	0.771597
GSM286871	0.091371	0	0.00214969	0.0145818	0	0.410112	0.0676678	0.0519706	0	0.0998156	0	0	0	0.136772	0.0488008	0.0442276	0.00759009	0	0.0132614	0	0.00405029	0.00762911	0	0.485946	0.873331
GSM286872	0	0.371964	0.0303603	0.0422789	0	0	0.0177473	0.0300652	0.00327112	0.0763539	0	0.0240291	0	0.239835	0.098803	0.055623	0	0	0.00281876	0	0	0.00685076	0	0.482083	0.875642
GSM286873	0	0.173092	0.180478	0.248421	0	0	0.134523	0.0243378	0	0.0232375	0	0.0795963	0	0.00778848	0.0418654	0.0556965	0.00417961	0.0185063	0	0	0.00453349	0.00374448	0	0.464309	0.88773
GSM286874	0.0379608	0.116572	0.121836	0.0898305	0	0	0.0749451	0.00394298	0	0.129153	0	0	0	0.146267	0.145028	0.124492	0	0	0.00847809	0	0	0.0014941	0	0.568678	0.827103
GSM286882	0.0817103	0.182453	0.0648173	0.0244017	0.0146528	0	0.0769323	0.0548926	0	0.0648039	0	0.0284722	0	0.175466	0.14566	0.0591944	0	0	0.0265441	0	0	0	0	0.533062	0.847153
GSM286883	0.095893	0.0788668	0	0.0741237	0	0.0283931	0.0918664	0.0591362	0	0.0691587	0.00801568	0	0	0.271196	0.170049	0.032475	0	0	0.020827	0	0	0	0	0.364624	0.93665
GSM286888	0.00529825	0	0.00490517	0.112756	0	0	0.358947	0.0642039	0	0.145468	0	0.0739909	0	0.0689497	0.0728295	0.0483778	0.00201111	0	0.0177853	0	0.00901779	0.0154597	0	0.345689	0.949969

## Sheet: Table S10
Supplementary Table-S10: The 34‐gene classification signature.
Gene Symbol
NNMT
PTGDS
HNMT
ASAH1
ENPP2
DPYD
OAT
ALDH2
DEGS1
TDO2
KYNU
PLA2G7
GUCY1A1
PAPSS2
GUCY1B1
PLPP3
CMPK2
PIK3CG
PTGIS
KMO
PLPP1
MTMR6
AKR1C3
PAPSS1
PRPS2
NMRK1
NANS
IMPDH2
PAICS
SRM
PFKP
GLO1
POLD2
PNP

[truncated: 1 more sheets: Table S11]
